# Supplementary material for: Global research in schizophrenia and serotonin: a bibliometric analysis
Source: Front Psychiatry. 2024 Aug 2;15:1436906. doi: 10.3389/fpsyt.2024.1436906 (PMC11329940; doi:10.3389/fpsyt.2024.1436906)
Supplement: Supplementary file 2 [file Table2.xlsx]

## Sheet: Description 
Manuscript	Global Research in Schizophrenia and Serotonin: A Bibliometric Analysis
What is this?	Source data for all figures and tables in the manuscript

## Sheet: Universities
id	organization	documents	citations	total link strength
1	"victor babes" university of medicine and pharmacy timisoara, 2nd e. murgu sq, timisoara, 300041, romania	1	6	3
2	'bb brodie' dept. of neuroscience, university of cagliari, 09124-i cagliari, italy	1	22	2
3	'lucio bini' mood disorders center, new york, ny, united states	1	94	3
4	'mario negri' inst. pharmacol. res., milan, italy	1	5	0
5	's heeren loo zorggroep, amersfoort, netherlands	1	67	11
6	'sveti ivan' psychiatric hospital, zagreb, croatia	1	40	3
7	00133 roma, via luigi volpicelli 8, italy	1	23	0
8	00136, rome, via prisciano 26, italy	1	24	1
9	04531-004 são paulo, sp, rua pedroso alvarenga, 1046 - cj 45, brazil	1	48	3
10	05409-011 são paulo sp, rua oscar freire 1758 / 35-b, brazil	1	8	1
11	1026 mhri 0720, ann arbor, mi 48109-0720, 205 zina pitcher place, united states	1	88	3
12	10623 berlin, jebensstrasse 3, germany	1	45	2
13	10623 berlin, jebensstraße 3, germany	1	11	2
14	11 medical park drive, pomona, 10970, ny, united states	1	50	4
15	11 medical park drive, pomona, ny 10970, suite 106, united states	1	54	1
16	112 skaggs hall, university of utah, salt lake city, ut 84112, united states	1	16	2
17	116a(b) va medical center, brecksville, oh 44141, 10,000 brecksville rd., united states	1	24	3
18	116c sfvamc, san francisco, ca 94122, 4150 clement street, united states	1	8	0
19	1177 yonge street, m4t 2y4., toronto, ont., canada	1	21	1
20	12830 el camino real suite #400, san diego, 92130, ca, united states	1	7	4
21	1475 budapest 10, p.o. box 27, hungary	1	7	0
22	182 00 prague 8, k ovčínu 10, czech republic	1	2	1
23	19009 rafina, 15 kritis st., greece	1	9	3
24	1st department of neurology, eginition hospital, medical school, national and kapodistrian university of athens, athens, greece	1	11	3
25	1st department of obstetrics and gynecology, centre of postgraduate medical education, ul. żelazna 90, warszawa, 02-004, poland	1	5	3
26	1st department of obstetrics and gynecology, medical university of warsaw, warsaw, poland	1	0	1
27	1st dept of anatomy of semmelweis medical university., 1450 budapest, üllo and #x030b;i út 93, hungary	1	29	2
28	1st laboratory, medicinal research laboratories, taisho pharmaceutical co. ltd., ohmiya, saitama 330-8530, 1-403 yoshino-cho, japan	1	8	0
29	1st laboratory, medicinal research laboratories, taisho pharmaceutical co. ltd., ohmiya, saitama 330-8530, japan	1	14	1
30	1st laboratory, medicinal research laboratories, taisho pharmaceutical co., ltd., ohmiya, saitama 330-8530, 1-403, yoshino-cho, japan	1	2	1
31	2 richland medical park, columbia, sc 29203, united states	1	8	5
32	2, st wilfrids court, monkgate, york yo31 7uq, united kingdom	1	0	0
33	21 montagu square, london, w1h 1re, united kingdom	1	3	0
34	22050-000 rj, av copacabacana 749/802, brazil	1	7	2
35	22q and you center, chop, philadelphia, united states	1	1	7
36	2300 turnhout, pater van mierlostraat 18, belgium	1	33	3
37	238 burnett hall, department of psychology, university of nebraska-lincoln, lincoln, 68588-0308, ne, united states	1	32	0
38	238 burnett hall, dept. of psychology, university of nebraska-lincoln, lincoln, ne 68588-0308, united states	1	6	0
39	23andme, inc., sunnyvale, ca, united states	1	11	11
40	28035 madrid, doctor juan josé lópez ibor 2, spain	1	21	3
41	2nd department of internal medicine, kyoto prefectural university of medicine, kyoto, japan	1	17	2
42	2nd department of psychiatry and psychiatric rehabilitation, medical university of lublin, poland	1	20	3
43	2nd department of psychiatry, faculty of medicine, pavol jozef safarik university, louis pasteur university hospital, kosice, 041 90, slovakia	1	0	4
44	2nd division, department of medicine, kyoto university school of medicine, kyoto, japan	1	17	2
45	2nd neurological department, university of athens, university hospital ‘attikon’, haidari, athens, united states	1	455	1
46	3-d pharmaceutical consultants inc, san diego, ca, united states	1	44	3
47	3-d pharmaceutical consultants, san diego, ca, united states	1	31	3
48	3-south, 116af, west los angeles va healthcare center, los angeles, ca 90073, 11301 wilshire blvd., united states	1	42	3
49	34390 nisantasi istanbul, valikonaǧi cad. 109/4 sorak ap., turkey	1	0	1
50	3d pharmaceutical consultants, inc., san diego, ca 92130, 13272 glencliff way, united states	1	66	2
51	3d-pharmaceutical partners, san diego, 92130, ca, united states	1	86	4
52	3rd department of psychiatry, aristotle university of thessaloniki, thessaloniki, greece	2	85	3
53	3rd faculty of medicine, charles university in prague, prague, czech republic	1	0	3
54	3rd faculty of medicine, charles university, prague 10, 100 00, czech republic	1	14	5
55	3rd faculty of medicine, charles' university, 100 00-prague 10, czech republic, czech republic	1	11	2
56	3rd medical faculty of charles university, prague, czech republic	1	33	1
57	3rd medical faculty, charles university, prague, czech republic	2	412	4
58	3rd psychiatric clinic, university of rome 'la sapienza', rome, italy	1	22	1
59	406 bethune building, queen elizabeth ii hsc, halifax, ns b3h 2y9, 1278 tower road, canada	1	8	3
60	42304 netanya, hanegev 6, israel	1	18	1
61	443 university of santo tomas hospital, clinical division, sampaloc, manila, philippines	1	2	4
62	487 carl building, box 3287, duke university medical center, durham, nc 27710, united states	1	61	1
63	4th department of internal medicine, faculty of medicine, pavol jozef safarik university, louis pasteur university hospital, kosice, 041 90, slovakia	1	0	4
64	5 boroughs nhs trust, sherdley unit, whiston hospital, prescot, merseyside l35 5dr, united kingdom	1	5	0
65	5 boroughs partnership nhs foundation trust, united kingdom	1	17	2
66	50500 mikkeli, tuukkalantie 17, finland	1	30	4
67	55535 pylaia thessaloniki, 6 odysseos st., greece	1	18	1
68	5777 east mayo boulevard, phoenix, 85054, az, united states	1	22	0
69	69117 heidelberg, meyerhofstrasse 1, germany	1	164	1
70	6th psychiatric department, otto-wagner-spital, vienna, austria	1	3	1
71	78530 buc, 1067 rue louis bleriot, france	1	9	6
72	8057 zürich, rothstrasse 54, switzerland	1	13	3
73	82024 taufkirchen, bahnhofsstr. 19b, germany	1	0	0
74	90.810-000 porto alegre, rio grande do sul (rs), ave. icaraí cristal 74 (clinic), brazil	1	13	2
75	9500 gilman drive, mc 0603, la jolla, 92093-0603, ca, united states	1	31	3
76	a. carlsson research ab, göteborg, sweden	1	143	1
77	a. i. karaev institute of physiology, azerbaijan academy of sciences, baku, azerbaijan	1	1	1
78	a. n. alekseev moscow city clinical psychiatric hospital no. 1., moscow, russian federation	1	3	2
79	a.i. virtanen institute for molecular sciences, university of eastern finland, kuopio, finland	2	18	20
80	a.i.g. collaborative research institute for aging and brain sciences, fukuoka university, fukuoka, japan	1	1	2
81	a.m. granov russian research center for radiology and surgical technologies, ministry of health of the russian federation, pesochny, st. petersburg, 197758, russian federation	1	2	5
82	a.o. ospedale niguarda ca' granda, programma 2000, milan, italy	1	53	0
83	aacap communications department, washington, dc 20016, 315 wisconsin avenue, n. w., united states	1	23	0
84	aalborg psychiatric hospital, aalborg university hospital, aalborg, denmark	1	97	5
85	aalborg university, department of health science and technology, niels jernes vej 14, aalborg, 9220, denmark	1	51	14
86	aarhus university hospital, regional center for child and adolescent psychiatry, risskov, aarhus, denmark	1	81	5
87	aarhus university hospital, risskov, aarhus, denmark	1	48	4
88	aarhus university hospital, risskov, denmark	1	23	11
89	aarhus university, aarhus, denmark	1	125	7
90	abarabnel mental health center, bat-yam, israel	1	108	3
91	abarbanel mental health center, 15 kkl street, bat-yam, 59100, israel	1	4	5
92	abarbanel mental health center, bat yam, 59100, israel	1	6	2
93	abarbanel mental health center, bat yam, israel	1	15	1
94	abarbanel mental health center, bat-yam and sackler fac. of medicine, tel-aviv university, ramat-aviv, israel	1	62	1
95	abarbanel mental health center, bat-yam, israel	3	99	11
96	abbott diagnostics division, 65205 wiesbaden, max-planck-ring 2, germany	1	60	2
97	abbott healthcare products bv (formerly solvay pharmaceuticals), c.j. van houtenlaan 36, cp weesp, 1381, netherlands	1	21	12
98	abbott laboratories, abbott park, il 60064, united states	1	46	7
99	abbott laboratories, abbott park, il, united states	1	207	2
100	abbott laboratories, european research and development, wiesbaden, germany	1	42	4
101	abbott laboratories, neuroscience development, abbott park, il 60064-6075, gprd r48b ap04-1, 100 abbott pk. rd., united states	1	19	0
102	abbott laboratories, neuroscience development, gprd, abbott park, il 60064-6075, 100 abbott park road, united states	1	136	0
103	abbott, astrazeneca, barr, united states	1	3	3
104	abbott, department r4cp, north chicago, il 60064, bldg. ap10, 100 abbott park road, united states	1	0	0
105	abbott, united states	1	0	10
106	abbvie deutschland gmbh & co. kg, dept. of pharmacology, knollstr., ludwigshafen, 67061, germany	1	21	12
107	abbvie deutschland gmbh and co kg, neuroscience research, 67061 ludwigshafen, knollstrasse 50, germany	1	60	2
108	abbvie, 2525 dupont ave, irvine, 92612, ca, united states	1	9	2
109	abbvie, madison, nj, united states	2	7	5
110	abbvie, neuroscience development, ludwigshafen, germany	1	2	2
111	abbvie, neuroscience development, north chicago, il 60064-6075, united states	1	60	2
112	abraham ribicoff research facilities, con-necticut mental health center, new haven, ct, united states	1	72	2
113	abraham ribicoff research facilities, connecticut mental health center, new haven, ct 06519, 34 park st., united states	1	24	6
114	abraham ribicoff research facilities, connecticut mental health center, new haven, ct, united states	2	729	6
115	abraham ribicoff research facility, connecticut mental health centre, yale university medical school, new haven, ct, united states	1	229	3
116	abran-associação brasileira de nutrologia/brazilian association of nutrology, sao paulo, catanduva, brazil	1	4	4
117	abt. klin. psychiat. psychotherapie, medizinische hochschule hannover, oe 7117, d-30625 hannover, carl-neuberg-str. 1, germany	1	17	4
118	abteilung neuropharmakologie, universität tübingen, tübingen, d-72074, mohlstrasse 54/1, germany	1	160	1
119	acad. dept. child adol. psychiat., inst. of psychiatry, denmark hill, london, united kingdom	1	95	1
120	acad. u. in rehab. psychiatry, preston, vic. 3072, 131 wood street, australia	1	20	1
121	academic center for ect and neuromodulation (accent), university psychiatric center ku leuven (catholic university of leuven), leuven, belgium	1	12	7
122	academic center, james connolly memorial hospital, dublin 15, ireland	1	3	2
123	academic computing, univ. texas southwestern med. ctr., dallas, tx, united states	1	275	6
124	academic department for old age psychiatry, euroa centre, prince of wales hospital, sydney, nsw 2031, barker street, australia	1	53	2
125	academic department for old age psychiatry, euroa centre, prince of wales hospital, sydney, nsw, australia	1	53	2
126	academic department for old age psychiatry, prince of wales hospital, randwick, nsw, australia	1	45	2
127	academic department of child and adolescent psychiatry, university of manchester, booth hall children's hospital, blackley, manchester, united kingdom	1	298	12
128	academic department of psychiatry and behavioural sciences, manchester university, williamson building oxford rd., manchester, m13 9lr, united kingdom	1	7	4
129	academic department of psychiatry, kolling institute, northern clinical school, faculty of medicine and health, the university of sydney, nsw, australia	1	4	9
130	academic department of psychiatry, st george hospital and community services, kogarah, nsw 2217, 7 chapel street, australia	1	16	2
131	academic department of psychiatry, st mary's hospital medical school, london w1 1ny, praed street, united kingdom	1	21	0
132	academic department of psychiatry, st mary's hospital medical school, london, w2 1ny, praed street, united kingdom	1	22	2
133	academic department of psychiatry, trinity college dublin, ireland	1	6	1
134	academic department of psychiatry, university college, middlesex school of medicine, london, w1n 8aa, united kingdom	1	22	2
135	academic department of psychological medicine, st. bartholomew's and royal london school of medicine and dentistry, london, united kingdom	1	39	4
136	academic discipline of psychiatry, school of medicine, university of queensland, brisbane, australia	1	6	4
137	academic division of geriatrics and neuropsychiatry, department of psychiatry, university of pittsburgh school of medicine, united states	1	3	2
138	academic frontier project for private university, comparative cognitive science institution, meijo university, nagoya, japan	1	67	2
139	academic hospital, vrijc universiteit, department of neurology, 1007 mb amsterdam, po box 7057, netherlands	1	94	1
140	academic medical center, department of psychiatry, amsterdam, netherlands	1	42	11
141	academic medical center, department of psychiatry, university of amsterdam, amsterdam, netherlands	1	27	2
142	academic medical center, university of amsterdam, academic psychiatric centre, early psychosis department, arkin, amsterdam, netherlands	1	60	2
143	academic medical centre, university of amsterdam department of psychiatry, amsterdam, 1105 az, meibergdreef 9, netherlands	1	47	1
144	academic medicine education institute, duke-nus medical school, singapore, singapore	1	2	10
145	academic psychiatry, translational and clinical research institute, newcastle university, newcastle upon tyne, united kingdom	1	2	18
146	academic psychiatry, wolfson research centre, campus for ageing and vitality, newcastle upon tyne, ne4 5pl, united kingdom	1	142	28
147	academic sub-department of psychological medicine, north wales hospital, denbigh, clwyd ll16 5ss, united kingdom	1	3	1
148	academic unit of electrical engineering, universidad autónoma de zacatecas, carretera zacatecas-guadalajara km.6. ejido la escondida, zacatecas, 98160, mexico	1	2	1
149	academic unit of psychiatry and addiction medicine, australian national university medical school, canberra hospital, po box 11, garran, 2605, act, australia	1	11	2
150	academic unit of psychiatry and addiction medicine, the australian national university school of medicine and psychology, canberra hospital, canberra, act, australia	1	1	4
151	academic unit of psychiatry, university of bristol, bristol, united kingdom	2	626	13
152	academic unit of psychological medicine, australian national university, australia	1	79	2
153	academy of cognitive therapy, united states	1	0	3
154	academy of medical science, serbian medical society, belgrade, serbia	1	9	2
155	academy of psychosomatic medicine, new york, ny, united states	1	24	3
156	acadia pharmaceuticals gmbh, basel, switzerland	3	32	10
157	acadia pharmaceuticals inc, 12830 el camino real, suite 400, san diego, 92130, ca, united states	1	9	0
158	acadia pharmaceuticals inc, san diego, 92130, ca, united states	1	4	1
159	acadia pharmaceuticals inc, san diego, ca, united states	2	93	1
160	acadia pharmaceuticals inc, san diego, united states	1	16	3
161	acadia pharmaceuticals inc., 11085 torreyana road, ste. 100, san diego, 92121, ca, united states	1	116	0
162	acadia pharmaceuticals inc., princeton, nj, united states	1	0	3
163	acadia pharmaceuticals inc., san diego, ca 92121, 3911 sorrento valley blvd, united states	2	70	0
164	acadia pharmaceuticals inc., san diego, ca 92121, 3911 sorrento valley blvd., united states	1	35	1
165	acadia pharmaceuticals inc., san diego, ca 92121, 3911 sorrento valley boulevard, united states	4	106	6
166	acadia pharmaceuticals inc., san diego, ca, united states	4	22	7
167	acadia pharmaceuticals, inc, princeton, nj, united states	1	2	3
168	acadia pharmaceuticals, inc, san diego, ca, united states	1	2	3
169	acadia pharmaceuticals, inc., san diego, ca 92121, united states	1	7	7
170	acadia pharmaceuticals, inc., san diego, ca, united states	1	18	3
171	acadia pharmaceuticals, san diego, ca, united states	3	274	7
172	accelerator program for discovery in brain disorders using stem cells (adbs), department of psychiatry, national institute of mental health & neuro sciences (nimhans), karnataka, bangalore, india	1	1	3
173	accident and emergency department, whipps cross hospital, barts health nhs trust, london e11 1nr, whipps cross road, united kingdom	1	24	1
174	ace pharmaceuticals bv, schepenveld 41, 3891 zk zeewolde, netherlands	1	21	12
175	acea biosciences inc., san diego, ca, united states	1	24	3
176	acetylon pharmaceuticals inc., boston, ma 02118, united states	1	46	7
177	achucarro basque center for neuroscience, leioa, bizkaia, spain	1	9	6
178	achucarro center for neuroscience, ikerbasque, basque foundation for science, bilbao, spain	1	7	4
179	acibadem university medical school, department of neurology, istanbul, turkey	1	0	1
180	actogenix nv, 9052 zwijnaarde, technologiepark 4, belgium	1	133	1
181	acupuncture research center, china medical university, taichung 40402, taiwan	1	6	4
182	ad libitum medical services, berlin, d-10437, senefelderstrasse 14, germany	1	200	1
183	ad libitum medical services, berlin, germany	1	200	1
184	adachi clinic, japan	1	25	10
185	adachi mental clinic, sapporo, 004-0867, japan	1	16	5
186	adamed ltd, pieńków 149, czosnów, 05-152, poland	1	11	3
187	adamed ltd., czosnõw, poland	1	23	3
188	adamed pharma s.a., czosnow, poland	1	29	1
189	adamed pharma s.a., pienkow, 6a mariana adamkiewicza street, czosnów, 05-152, poland	1	4	2
190	addenbrooke's hospital, cambridge, united kingdom	3	91	17
191	addex therapeutics, geneva, switzerland	1	38	2
192	addiction and pharmacology research laboratory, california pacific medical center research institute, ca, united states	1	3	0
193	addiction biology and honorary consultant psychiatrist, imperial college london and central north west london nhs foundation trust, london, united kingdom	1	151	25
194	addiction division, camh, toronto, on, canada	1	0	11
195	addiction division, department of psychiatry, university hospitals of geneva, geneva, switzerland	1	4	5
196	addiction pharmacology research laboratory, california pacific medical center research institute, san francisco, ca, united states	1	45	0
197	addiction policy, dalla lana school of public health, university of toronto, toronto, on, canada	1	93	39
198	addiction psychiatry program, department of psychiatry, university of toronto, toronto, on, canada	1	85	1
199	addiction psychiatry residency, yale university, school of medicine, united states	1	21	7
200	addiction psychiatry, foederatio medicorum helveticorum, geneva, switzerland	1	4	5
201	addiction research center, national cheng kung university, tainan, taiwan	1	105	1
202	addiction research center, nida/nih, baltimore, md 21224, p.o. box 5180, united states	1	9	0
203	addiction research centre, national cheng kung university, tainan, taiwan	1	45	3
204	addiction research group (grad), neuroscience research program, hospital del mar medical research institute (imim), barcelona, 08003, spain	1	12	4
205	addiction research group, schulich school of medicine & dentistry, university of western ontario, london, n6c 5a1, ontario, canada	1	69	3
206	addiction research program, massachusetts general hospital, boston, ma 02114, 25 staniford st, united states	1	155	6
207	addiction research program, massachusetts general hospital, boston, ma, united states	1	155	6
208	addiction research unit, osaka psychiatric research center, osaka psychiatric medical center, osaka, japan	1	29	3
209	addiction treatment unit no. 1, 35100 padova, via berchet 20, italy	1	201	3
210	addiction treatment unit no. 2, padova, italy	1	201	3
211	addictions and mental health strategic clinical network, ab, canada	1	5	4
212	addis ababa university, college of health sciences, school of medicine, department of psychiatry, tikur anbessa hospital, 6th floor college of health sciences building, po 9086, addis ababa, ethiopia	1	3	9
213	additional support for learning service, communities and families, city of edinburgh council, edinburgh, united kingdom	1	0	4
214	address reprint requests to frank p. bymaster, lilly res. labs., neuroscience research division, lilly corporate center, indianapolis in 46285-0510, united states	1	42	1
215	adelaide medical school, the university of adelaide, adelaide, sa, australia	1	4	5
216	adelaide rural clinical school, university of adelaide, adelaide, australia	1	4	2
217	adhd outpatient program & development psychiatry program, hospital de clínicas de porto alegre, porto alegre, brazil	1	15	10
218	adir, 92415 courbevoie cedex, 1, rue carle hébert, france	1	78	4
219	adis a wolters kluwer business, north shore 0754, auckland, 41 centorian drive, private bag 65901, new zealand	1	36	0
220	adis international limited, auckland 10, 41 centorian drive, mairangi bay, new zealand	1	41	1
221	adis international limited, auckland 10, 41 centorian drive, new zealand	1	42	1
222	adis international limited, auckland 1311, 41 centorian drive, mairangi bay, new zealand	1	99	1
223	adis international limited, auckland 1311, 41 centorian drive, new zealand	1	125	1
224	adis international limited, auckland, 41 centorian drive, private bag 65901 mairangi bay, new zealand	1	21	0
225	adis international limited, auckland, new zealand	7	665	7
226	adis international limited, mairangi bay, auckland 10, 41 centorian drive, new zealand	4	349	1
227	adis international limited, mairangi bay, auckland 1311, 41 centorian drive, new zealand	1	271	1
228	adis international ltd., auckland 1311, 41 centorian drive, new zealand	1	36	1
229	adis, 0754 auckland, 41 centorian drive 65901, north shore, mairangi bay, new zealand	1	3	0
230	adis, 0754 auckland, 41 centorian drive, private bag 65901, new zealand	1	35	0
231	adis, 0754 auckland, private bag 65901, mairangi bay, north shore, new zealand	1	35	0
232	adis, a wolters kluwer business, north shore 0754, auckland, 41 centorian drive, private bag 65901, mairangi bay, new zealand	4	90	0
233	adis, auckland, 41 centorian drive, north shore 0754, new zealand	1	4	0
234	adis, auckland, north shore 0754, 41 centorian drive private bag 65901, mairangi bay, new zealand	1	65	0
235	adis, mairangi bay, north shore 0754, auckland, 41 centorian drive, new zealand	1	1	0
236	adis, north shore 0754, auckland, 41 centorian drive, mairangi bay, new zealand	1	65	0
237	adis, north shore 0754, auckland, 41 centorian drive, private bag 65901, mairangi bay, new zealand	1	29	0
238	adis, wolters kluwer business, mairangi bay, north shore 0754, auckland, 41 centorian drive, new zealand	1	107	0
239	adis, wolters kluwer business, north shore 0754, auckland, 41 centorian drive, new zealand	1	25	0
240	adis, wolters kluwer business, north shore 0754, auckland, 41 centorian drive, private bag 65901, mairangi bay, new zealand	1	7	0
241	adler school of professional psychology, chicago, il, united states	1	7	5
242	adoc doo, beograd, serbia	1	1	2
243	adolescent and youth service, northside clinic, st leonards, australia	1	0	3
244	adolescent inpatient department, geha psychiatric hospital, rabin medical center, petah tiqva 49 100, p.o. box 102, israel	1	180	2
245	adolescent inpatient unit, geha mental health center, petach tikva 49100, po box 102, israel	1	0	1
246	adolescent inpatient unit, shalvata mental health center, petah tiqwa, israel	1	56	4
247	adolescent mental health team, newham, london, united kingdom	1	1	1
248	adolescent psychiatric clinic, satakunta hospital district, fi-28100 pori, hansakatu 5, finland	1	6	3
249	adolescent psychiatric clinic, turku university hospital, fi-20700 turku, kunnallissairaalantie 20, finland	1	6	3
250	adolescent psychiatry clinic, fi-28100 pori, hansakatu 5, finland	1	3	2
251	adolescent psychiatry, ege university faculty of medicine, izmir, turkey	1	14	4
252	adolescent substance abuse committee, american academy of child and adolescent psychiatry, washington, dc, united states	1	53	1
253	adolescent unit, department of psychiatry, hospital general universitario gregorio marañón, centro de investigación biomédica en red de salud mental (cibersam), c.p:28009, c/ibiza 43, spain	1	4	32
254	adult admission unit, john umstead hospital, butner, nc 27509, united states	1	36	0
255	adult and geriatric psychiatry, medical university of south carolina, charleston, sc, united states	1	20	2
256	adult department, tavistock clinic, london, united kingdom	1	2	2
257	adult detoxification and rehabilitation services, center for addiction services, st. francis medical center, pittsburgh, pa, united states	1	19	1
258	adult intensive therapy unit, john radcliffe hospital, headington, oxford ox3 9du, united kingdom	1	0	0
259	adult mental health directorate, nottinghamshire healthcare trust, nottingham, united kingdom	1	23	5
260	adult mental health rehabilitation unit, northwestern mental health, melbourne health and sunshine hospital, western health, st albans, vic, australia	1	5	3
261	adult mental health rehabilitation unit, northwestern mental health, melbourne health, sunshine hospital, st albans, vic, australia	1	0	1
262	adult mental health service, southern healthcare network, vic, australia	1	80	2
263	adult psychiatry branch intramural research program, national institute of mental health, saint elizabeths hospital, washington, dc, united states	1	17	1
264	adult psychiatry branch, division of special mental health research, intramural research program, national institute of mental health, st elizabeths hospital, washington, dc, united states	1	95	0
265	adult psychiatry branch, united states	1	133	3
266	adult psychiatry department, university hospital, 31-501 kraków, 21a kopernika str., poland	1	1	2
267	adult psychiatry service, university hospital of geneva, geneva, switzerland	1	10	1
268	adult psychiatry, mayo clinic, rochester, mn 55905, 200 first street sw, united states	1	61	1
269	advance research and development laboratory, bumrungrad international hospital, bangkok, thailand	1	1	6
270	advanced accelerator applications germany, bonn, germany	1	2	5
271	advanced diagnostic system research laboratory, fujita health university graduate school of health sciences, toyoake, 470-1192, japan	1	12	8
272	advanced diagnostic system research laboratory, fujita health university, graduate school of health sciences, toyoake, japan	1	22	4
273	advanced eye center, postgraduate institute of medical education and research, chandigarh, 160012, india	1	0	1
274	advanced instrumental screening center, “victor babes” university of medicine and pharmacy, 2 eftimie murgu square, timisoara, 300041, romania	1	15	3
275	advanced molecular diagnostics unit, sant'andrea hospital, sapienza university of roma, rome, italy	1	18	8
276	advanced pharmacognosy research laboratory, department of pharmaceutical technology, jadavpur university, kolkata, 700032, india	1	8	10
277	advanced pkpd modelling and simulation, janssen research and development, a division of janssen pharmaceutica nv, beerse, belgium	1	12	4
278	advanced specialty training program in reproductive psychiatry, the johns hopkins university school of medicine, 550 n. broadway, suite 305c, baltimore, 21205, md, united states	1	4	7
279	advanced therapy medicinal product (atmp) department, breast cancer research center, motamed cancer institute, acecr, tehran, iran	1	10	9
280	adviser to the british national formulary, united kingdom	1	0	1
281	aerodigestive center, center for motility and functional gastrointestinal disorders, division of gastroenterology, hepatology and nutrition, boston children’s hospital, 300 longwood ave, hun ground, boston, 02115, ma, united states	1	6	1
282	afb international, 3 research park drive, st. charles, mo, united states	1	14	3
283	afdeling psychosen, ucp/cc60, university medical center groningen, groningen 9700rb, postbus 30001, netherlands	1	33	7
284	affective disord. prog. dept. p., veterans association, connecticut healthcare system, west haven, ct, united states	1	60	2
285	affective disorder unity, clinical hospital, federal university of pernambuco, brazil	1	28	3
286	affective disorders program, london health sciences centre, london, ont. n6a 4g5, canada	1	10	0
287	affective disorders program, silver hill hospital, new canaan, ct 06840, 208 valley road, united states	1	24	9
288	affective disorders research program, silver hill hospital, new canaan, ct, united states	1	0	1
289	affective disorders, unit, casa di cura parco dei tigli, padoua, italy	1	10	1
290	affiliated hospital of guangdong medical university, zhanjiang, china	1	0	4
291	affiliated hospital of shandong university of traditional chinese medicine, ji’nan, 250014, china	1	8	4
292	affiliated hospital of the institute of neurology, anhui university of chinese medicine, hefei, china	1	30	1
293	affiliated mental health centre & hangzhou seventh people’s hospital, zhejiang university school of medicine, zhejiang, hangzhou, 310013, china	1	9	1
294	affiliations: departments of medicine (salter, yousuf), rheumatology (jessome) and neurology (tarnopolsky), mcmaster university, hamilton, ont.	1	5	0
295	afmsd, delhi, india	1	5	2
296	ag katamnese - projektmanagement k., psychiat. klin. der lmu münchen, münchen, germany	1	5	1
297	ag katamnese, projektmanagement k., psychiat. klin. der lmu münchen, 80336 münchen, nussbaumstr. 7, germany	1	5	1
298	aged and residential care services, austin health, heidelberg, vic. 3081, po box 5444, australia	1	5	1
299	aged and residential care services, austin health, heidelberg, vic., australia	1	5	1
300	aged mental health research unit, school of psychology and psychiatry, monash university, melbourne, australia	1	6	4
301	aged psychiatry, monash university, melbourne and caulfield aged psychiatry service, melbourne, australia	1	6	4
302	ageing and mental health research group, school of human and health sciences, university of huddersfield, huddersfield, united kingdom	1	31	2
303	ageing group, centre for public health, school of medicine, dentistry and biomedical sciences, queen's university, belfast, united kingdom	1	925	73
304	agence nationale de sécurité du médicament et des produits de santé, saint-denis, france	1	3	9
305	aghios charalambos mental health center, heraklion, 71305, crete, greece	1	52	1
306	aging mind and brain initiative, university of iowa carver college of medicine, iowa city, ia 52242, united states	1	138	2
307	aichi medical university, neuropsychiatric department, nagakute, japan	1	25	10
308	aids psychiatry service, meyer 4-119, johns hopkins hospital, baltimore, md 21287-7419, 600 north wolfe street, united states	1	7	0
309	aino university, ibaraki, 567-0012, japan	1	12	8
310	aisrap, mt. gravatt campus, griffith university, qld 4111, australia	1	80	1
311	aix marseille univ, cnrs, école centrale marseille, umr 7249, institut fresnel, cerimed, 27, boulevard jean moulin, marseille, 13005, france	1	1	4
312	aix marseille univ, school of medicine - la timone medical campus, ea 3279, ceress – health service research and quality of life center, marseille, france	1	8	2
313	aix-marseille univ, cnrs, crn2m, marseille, france	1	7	13
314	aix-marseille univ, cnrs, int, inst neurosci timone, marseille, france	1	7	13
315	aix-marseille univ, school of medicine - la timone medical campus, ea 3279: ceress - health service research and quality of life center, 27 boulevard jean moulin, marseille, 13005, france	1	15	16
316	ajou university, school of medicine, suwon, south korea	1	117	6
317	akashi tsuchiyama hospital, hyogo 674-0074, 2744-30, shimizu, uozumi, akashi, japan	1	66	1
318	akdeniz university, department of family medicine, antalya 07058, turkey	1	1	1
319	akershus university hospital, oslo, norway	1	5	8
320	akita kaiseikai hospital, akita 010-0063, 1-7-5 ushijimanishi, japan	1	26	3
321	akron children's hospital, akron, oh, united states	1	57	2
322	al-manara cap centre, kcmh, kuwait	1	0	4
323	al-manara cap centre, kuwait centre for mental health (kcmh), jamal abdul-nassir st, shuwaikh, kuwait	1	0	4
324	al-manara cap centre, kuwait centre for mental health (kcmh), shuwaikh, kuwait	1	2	1
325	al-manara cap centre, kuwait centre for mental health (kcmh), state of, shuwaikh, kuwait	1	3	1
326	alabama department of mental health and mental retardation, montgomery, al, united states	1	10	5
327	alabama psychiatric service, birmingham, al, united states	1	6	6
328	alanya can hospital, department of neurology, alanya, turkey	1	9	0
329	albany co. dept. of mental health, albany, ny, united states	1	3	6
330	albany college of pharmacy, albany, ny 12208, 106 new scotland avenue, united states	1	46	2
331	albany college of pharmacy, albany, ny, united states	1	46	2
332	albany medical college, department of neurology, albany, ny, united states	1	36	1
333	albemarle catalysts company b.v., nieuwendammerkade 1–3, 1022 ab amsterdam, netherlands	1	21	12
334	albert einstein college of medicine	1	6	4
335	albert einstein college of medicine (aecom), 1300 morris park ave, bronx, 10461, ny, united states	1	2	3
336	albert einstein college of medicine, anxiety and depression program, montefiore medical center, bronx, ny, united states	1	1	1
337	albert einstein college of medicine, bronx, ny, united states	10	2865	39
338	albert einstein college of medicine, bronx, united states	3	137	12
339	albert einstein college of medicine, united states	1	6	4
340	albert einstein college of medicine/children's hospital at montefiore, bronx, ny, united states	1	7	1
341	albert einstein school of medicine, united states	1	33	7
342	albert road clinic, department of psychiatry, university of melbourne, melbourne, vic, australia	1	1	5
343	alberta children's hospital mental health program, calgary, ab, canada	1	43	12
344	alberta children's hospital research institute, cumming school of medicine, univeristy of calgary, calgary, ab, t2n 4n1, canada	1	31	5
345	alberta children's hospital research institute, cumming school of medicine, university of calgary, calgary, ab, canada	1	10	9
346	alberta children’s hospital research institute, university of calgary, calgary, t2n 4n1, ab, canada	1	15	8
347	alberta hospital, edmonton, alberta, t5j 2j7, edmonton box 307, canada	1	6	1
348	alborz university of medical sciences, dietary supplements and probiotic research center, karaj, iran	1	86	6
349	alcohol addiction program, latium region referral center, sapienza university of rome, roma, 00185, italy	1	16	17
350	alcohol unit, bari, italy	1	9	17
351	alcohol unit, cosenza, italy	1	9	17
352	alcohol unit, milan, italy	1	9	17
353	alcohol unit, nicosia, italy	1	9	17
354	alcohol unit, pordenone, italy	1	9	17
355	alcohol unit, salerno, italy	1	9	17
356	alcohol unit, torino, italy	1	9	17
357	alcoholo unit, savona, italy	1	9	17
358	alekseev psychiatric clinical hospital no. 1, moscow health department, moscow, russian federation	1	0	2
359	alekseev psychiatric clinical hospital no. 1, moscow, russian federation	1	0	1
360	alexian bros. behav. health hospital, hoffman estates, il, united states	1	317	6
361	alexianer hospital aachen, aachen, germany	2	7	17
362	alexianer hospital, krefeld, germany	1	95	1
363	alfred child/adol. mental hlth. serv, moorabbin, vic. 3189, 999 nepean highway, australia	1	8	2
364	alfred p. sloan school of management, massachusetts inst. of technology, national bureau of economic research, cambridge, ma 02142, united states	1	5	1
365	alfred psychiatry research centre, alfred hospital, melbourne, vic 3004, old baker building, australia	1	41	0
366	alfred psychiatry research centre, alfred hospital, prahran, vic. 3181, commercial road, australia	1	59	3
367	alfred psychiatry research centre, department of psychological medicine, monash university, melbourne, vic, australia	1	7	4
368	alfred psychiatry research centre, monash university, department of psychological medicine, prahran, vic. 3004, commercial road, australia	1	28	1
369	alfred psychiatry research centre, old baker building, alfred hospital, prahran, 3181 vic, commercial road, australia	1	33	3
370	alfred psychiatry research centre, school of psychology, alfred and monash university, melbourne, vic, australia	1	33	3
371	alfred psychiatry research centre, the alfred and monash university, school of psychology, psychiatry and psychological medicine, melbourne, 3004, commercial road, australia	1	172	3
372	alfred psychiatry research centre, the alfred hospital, monash university, melbourne, 3181, australia	1	115	3
373	algemeen psychiatrisch centrum, amsterdam, 1054 ag, 2e c. huygensstraat 37, netherlands	1	76	2
374	alice-salomon-hochschule, university of applied sciences (asfh), berlin, germany	1	25	6
375	alimentary pharmabiotic centre, university college cork, cork, ireland	1	51	6
376	alimentary pharmacobiotic centre, department of psychiatry, university college cork, cork, ireland	1	15	1
377	alkermes, inc., waltham, ma, united states	1	4	1
378	all children's hospital, john hopkins medicine, 600 n wolfe st # 157, baltimore, 21287, md, united states	1	28	9
379	all india institute of medical sciences in raipur, india	1	2	0
380	alla chem llc, hallandale beach, fl, united states	1	8	6
381	alla chem llc, hallandale beach, united states	1	12	4
382	allana college of pharmacy, pune 411 001, azam campus, india	1	25	2
383	allegheny neurological assoc., pittsburgh, pa, united states	1	1	2
384	allentown, pa, united states	1	0	1
385	allergan, madison, nj, united states	2	73	10
386	allergy center, istituto giannina gaslini, genoa, italy	1	7	3
387	allergy clinic, casa di cura villa montallegro, via p. boselli 5, genoa, 16146, italy	1	7	3
388	allgemeine psychologie, universität konstanz, 78434 konstanz, germany	1	13	3
389	alliance for hum. res. protection, c/o hospital audiences inc., new york, ny 10012, 548 broadway, united states	1	9	0
390	alliant international university, sacramento, ca, united states	2	1	0
391	almirall research center, 08024 barcelona, cardener 68-74, spain	1	2	0
392	alpert medical school of brown university, department of neurology, providence, ri 02906, united states	1	38	1
393	alpert medical school of brown university, department of psychiatry and human behavior, providence, ri, united states	1	1	5
394	alpert medical school of brown university, women's medicine collaborative, providence, ri 02904, 146 west river street, united states	1	29	0
395	alpert medical school, brown university, united states	1	62	7
396	alpha-2 pharmaceutica ab, tel aviv 69379, 8 rosemblum street, israel	1	48	0
397	altheadx, san diego, ca, united states	1	18	3
398	altrecht institute for mental health care, den dolder and utrecht, netherlands	1	7	2
399	alumnus, indira gandhi medical college, nagpur, mh, india	1	7	2
400	alzheimer center amsterdam, neurology, vrije universiteit amsterdam, amsterdam umc location vumc, amsterdam, netherlands	1	1	9
401	alzheimer centre, palazzolo s/o, brescia, brescia, italy	1	31	6
402	alzheimer centre, palazzolo s/o, brescia, italy	1	77	5
403	alzheimer disease research unit, massachusetts general hospital-east, cny 6028, charlestown, ma 02129, 149 13th street, united states	1	31	0
404	alzheimer research/clinical programs, north charleston, sc 29406-6076, 5900 core rd., united states	1	29	0
405	alzheimer's association, chicago, il, united states	1	681	8
406	alzheimer's disease and memory disorders center	1	0	1
407	alzheimer's disease and memory disorders center, baylor college of medicine, houston, tx, united states	1	11	0
408	alzheimer's disease research centre, department of neurobiology, care sciences and society, karolinska institute, stockholm, sweden	1	45	7
409	alzheimer's disease research unit, mcgill center for studies in aging, department of neurology, montreal, que., canada	1	49	2
410	alzheimer's disease research unit, mcgill centre for studies in aging, douglas hospital, verdun, que., canada	1	60	2
411	alzheimer's disease research unit, yale university school of medicine, new haven, ct, united states	1	32	4
412	alzheimer's res. and clin. programs, medical university of south carolina, north charleston, sc 29406, 5900 core road, united states	1	7	2
413	alzheimer's res. and clin. programs, medical university of south carolina, north charleston, sc, united states	1	7	2
414	alzheimer's research and clinical programs, medical university of south carolina, charleston, sc, united states	1	0	1
415	alzheimer's research center, department of pharmacology and toxicology, medical college of georgia, augusta, ga 30912, united states	1	42	3
416	alzheimer's research, merck research laboratories, west point, pa 19486, 770 sumneytown pike, united states	1	36	2
417	alzheimer's society (uk), devon house, london, united kingdom	2	177	4
418	alzheimer's society, united kingdom	1	4	2
419	amazon web services, portland, or, united states	1	0	1
420	ambulatory services, body dysmorphic disorder program, butler hospital, providence, ri, united states	1	25	2
421	amedeo avogadro university, novara, italy	1	17	19
422	amen clinics, costa mesa, ca, united states	1	5	1
423	american academy of neurology, st. paul, mn 55116, 1080 montreal avenue, united states	1	0	0
424	american board of pediatrics, chapel hill, nc, united states	1	47	10
425	american college of medical toxicology, 10645 n tatum blvd., suite 200-111, phoenix, 85028, az, united states	1	0	7
426	american diabetes association, alexandria, va, united states	1	866	27
427	american foundation for suicide prevention, new york, ny, united states	1	57	21
428	american psychiatric institute for research and education, american psychiatric association, united states	1	46	1
429	american psychiatric institute for research and education, arlington va 22209-3901, 1000 wilson boulevard, united states	1	10	0
430	american psychiatric institute for research and education, arlington, va 22209, 1000 wilson boulevard, united states	1	6	4
431	american psychiatric institute for research and education, practice research network, arlington, va 22209, 1000 wilson blvd., united states	1	46	1
432	american psychiatric institute for research and education, united states	1	0	1
433	american society of clinical psychopharmocology, united states	1	0	3
434	american university of the caribbean, st maarten	1	0	4
435	american university, beirut medical center, beirut, lebanon	1	25	2
436	amgen inc., one amgen center drive, thousand oaks, ca, united states	1	81	1
437	amgen inc., south san francisco, ca 94080, 1120 veterans boulevard, united states	1	152	2
438	amgen, small molecule drug discovery, thousand oaks, ca 91320-1789, 1840 dehavilland dr, united states	1	55	2
439	amity institute of pharmacy, amity university madhya pradesh, gwalior, india	1	0	3
440	amrita centre for nanosciences and molecular medicine, amrita institute of medical science and research centre, amrita vishwa vidyapeetham, kerala, kochi, 682041, india	1	4	1
441	amrita school of pharmacy, amrita vishwa vidyapeetham, aims health sciences campus, kochi, india	1	34	0
442	amrita school of pharmacy, amrita vishwa vidyapeetham, kerala, kochi, 682041, india	1	4	1
443	amstelland hospital, amstelveen, netherlands	1	37	0
444	amsterdam brain and cognition, university of amsterdam, amsterdam, netherlands	2	94	5
445	amsterdam brain and cognition, university of amsterdam, netherlands	1	35	1
446	amsterdam neuroscience, mood, anxiety, psychosis, sleep & stress program, amsterdam, netherlands	2	4	17
447	amsterdam neuroscience, neurodegeneration, amsterdam, the netherlands alzheimer center amsterdam, department of neurology, amsterdam neuroscience, vrije universiteit amsterdam, amsterdam umc, amsterdam, netherlands	1	1	9
448	amsterdam public health research institute, mental health, amsterdam, netherlands	1	3	8
449	amsterdam public health, aging & later life, de boelelaan 1109, amsterdam, 1081 hv, netherlands	1	1	2
450	amsterdam umc location university of amsterdam, medical psychology, amsterdam, netherlands	1	3	8
451	amsterdam umc location vrije universiteit amsterdam, psychiatry, de boelelaan, amsterdam, 1117, netherlands	1	3	8
452	amsterdam umc, department of anatomy and neurosciences, amsterdam neuroscience, amsterdam, netherlands	1	5	5
453	amsterdam umc, location vrije universiteit amsterdam, department of medicine for older people, de boelelaan 1109, amsterdam, 1081 hv, netherlands	1	1	2
454	amsterdam umc, vrije universiteit amsterdam, department of psychiatry, amsterdam neuroscience, amsterdam, netherlands	1	5	5
455	amsterdam umc, vrije universiteit amsterdam, netherlands	1	6	11
456	amsterdam umc, vrije universiteit amsterdam, radiology and nuclear medicine, amsterdam neuroscience, netherlands	1	0	2
457	amsterdam umc, vrije universiteit, psychiatry, amsterdam neuroscience, netherlands	1	12	7
458	amsterdam umc, vrije universiteit, psychiatry, amsterdam public health research institute, netherlands	1	12	7
459	amylin pharmaceuticals, united states	1	108	5
460	an-nan hospital, china medical university, tainan, taiwan	1	63	32
461	analysis & pharmacokinetics research, drug discovery research, astellas pharma inc., 21 miyukigaoka, tsukuba-shi, 305-8585, ibaraki, japan	1	8	2
462	analysis and pharmacokinetics research laboratories, astellas pharma inc., tsukuba, ibaraki, japan	1	15	1
463	analysis group, inc, boston, ma 02199, 111 huntington avenue, united states	1	2	1
464	analysis group/economics, cambridge, ma 02138, one brattle square, united states	1	2	0
465	analytic and translational genetics unit, massachusetts general hospital, boston, ma, united states	1	925	73
466	analytical and translational genetics unit, massachusetts general hospital, boston, 02142, ma, united states	1	44	13
467	anatomical, histological, forensic medicine, and orthopedic sciences (saimlal) department, sapienza university, rome, italy	1	12	3
468	anatomy department, university of cambridge, united kingdom	1	0	1
469	anatomy, animal physiology and biophysics dept, university of bucharest, romania	1	6	3
470	and carley k. vint, b.sc., is research technician, clarke institute of psychiatry, 250 college street, toronto, ontario m5t 1r8, canada	1	124	4
471	and donald j. cohen, m.d., is professor of pediatrics, psychiatry, and psychology, and director, child study center, yale university, new haven, ct, usa	1	39	3
472	and the departments of neurology, radiology, and psychiatry, harvard medical school, boston	1	59	2
473	and university of lisbon, lisbon school of medicine (fmul), instituto de medicina molecular, lisbon, portugal	1	17	18
474	andalusian centre of molecular biology and regenerative medicine (cabimer), university pablo olavide, university of seville, seville, spain	1	4	7
475	andranik chavushyan, institute of molecular biology nas ra, yerevan, armenia	1	2	4
476	andrew duncan clinic, royal edinburgh hospital, edinburgh eh10 5hf, morningside terrace, united kingdom	1	29	0
477	andrology, women’s endocrinology and gender incongruence unit, department of experimental and clinical biomedical sciences “mario serio”, university of florence, florence, italy	1	2	0
478	andrology, women’s endocrinology and gender incongruence unit, florence university hospital, viale pieraccini 6, florence, 50139, italy	1	5	1
479	andrzej frycz modrzewski university, krakow, poland	1	9	5
480	anesthesia and pain management, toronto general hospital, university health network, toronto, on, canada	1	2	5
481	anesthesiology and critical care, hospital of the university of pennsylvania, philadelphia, pa, united states	1	1	5
482	anesthesiology department, mt. sinai hospital, chicago, il 60608, united states	1	3	1
483	anesthesiology, wayne state university school of medicine, detroit, mi 48201, united states	1	2	2
484	angelini (acraf spa), rome, pomezia, italy	1	159	3
485	angelini pharma s.p.a., viale america 70, rome, 00181, italy	1	4	2
486	anhui institute of translational medicine, hefei, china	1	0	9
487	anhui mental health center, hefei, china	2	8	13
488	anhui province key laboratory of cognition and neuropsychiatric disorders, hefei, china	2	8	13
489	animal physiology, university of tübingen, d-72076 tübingen, auf der morgenstelle 28, germany	1	8	1
490	animal sciences group, wageningen univ. and research centre, box 65, edelhertweg 15, 8200 ab l., netherlands	1	797	3
491	ankara university, faculty of medicine, department of pharmacology, molecular biology and technology development unit, ankara, turkey	1	4	2
492	ankara university, faculty of medicine, department of psychiatry, ankara university brain research center (aubaum), ankara, turkey	1	3	3
493	ann arbor va medical center psychiatry service, ann arbor, mi, united states	1	7	3
494	ann arbor vamc, ann arbor, mi, united states	1	0	2
495	anna freud national centre for children and families, london, united kingdom	1	5	7
496	anne lingford-hughes phd mrcpsych is reader in biological psychiatry and addiction, the university of bristol, united kingdom	1	0	1
497	annenberg school for communication, university of pennsylvania, philadelphia, 19104, pa, united states	1	0	9
498	anokhin institute of normal physiology, moscow, russian federation	1	1	1
499	anorexia and eating disorder unit, child and adolescent psichiatry unit, bambino gesù children’s hospital, irccs, piazza di sant’onofrio 4, rome, 00165, italy	1	0	5
500	antalya training and research hospital, neurology clinic, antalya, turkey	1	1	1
501	antara psychiatric centre, department of psychiatry, kolkata, 700 145, west bengal, india	1	5	2
502	antes center for mental health care, poortugaal, netherlands	1	23	6
503	antipsychotic research laboratory, illawarra health and medical research institute, wollongong, 2522, nsw, australia	1	15	1
504	antipsychotic research laboratory, illawarra health and medical research institute, wollongong, nsw, australia	4	32	13
505	antipsychotics research laboratory, illawarra health and medical research institute, university of wollongong, wollongong, nsw 2522, australia	1	75	3
506	antwerpen, waalse kaai 5, belgium	1	33	3
507	anxiety and depression research program, institute of psychiatry, federal university of rio de janeiro (ipub/ufrj), rio de janeiro, brazil	1	22	3
508	anxiety and depression research program, institute of psychiatry, universidade federal do rio de janeiro (ipub/ufrj), rio de janeiro, rj, brazil	1	5	1
509	anxiety and depression research program, institute of psychiatry, universidade federal of rio de janeiro (ipub-ufrj), rio de janeiro, brazil	1	23	4
510	anxiety and depression research program, institute of psychiatry, universidade federal of rio de janeiro (ipub/ufrj), niterói, rj 24230190, rua otávio carneiro 93, brazil	1	39	2
511	anxiety and depression research program, institute of psychiatry, universidade federal of rio de janeiro, rio de janeiro-rj, cep: 22410-003, rua visconde de pirajá 547, brazil	1	23	4
512	anxiety and mood disorders program, intramural research program, national institute of mental health, bethesda, md, united states	1	24	6
513	anxiety disord. clin./psychol. serv., va boston healthcare system, boston, ma, united states	1	474	4
514	anxiety disorder program, hospital de clínicas de porto alegre (hcpa), porto alegre (rs), brazil	1	3	1
515	anxiety disorders clinic, centre for addiction and mental health, toronto, on m5t 1r8, 250 college street, canada	1	22	2
516	anxiety disorders clinic, centre for ocd and related disorders, new york state psychiatric inst., new york, ny, united states	1	95	10
517	anxiety disorders clinic, new york state psychiatric institute, new york, ny 10032, 1051 riverside drive, united states	1	122	1
518	anxiety disorders clinic, ubc hospital, 2221 westbrook mall, vancouver, bc v6t 2b5, canada	1	2	1
519	anxiety disorders in children and adolescent program, department and institute of psychiatry, university of são paulo, são paulo - sp, cep: 05403-010, rua dr. ovídio pires de campos, brazil	1	20	2
520	anxiety disorders outpatient program for children and adolescents, protaia, hospital de clínicas de porto alegre, porto alegre, rs, 90035-903, ramiro barcelos street, brazil	1	7	5
521	anxiety disorders program, hospital de clínicas de porto alegre (hcpa), universidade federal do rio grande do sul (ufrgs), porto alegre (rs), brazil	1	1	3
522	ap-hm, aix-marseille univ, school of medicine - la timone medical campus, ea 3279: ceress - health service research and quality of life center, 27 boulevard jean moulin, marseille, 13005, france	1	1	14
523	ap-hp department of adolescent psychopathology and medicine, maison de solenn, university paris descartes, paris, france	1	152	40
524	ap-hp hôpital fernand widal, inserm u705, umr 8206, paris, france	1	1	4
525	ap-hp hôpital raymond poincaré, 104 bd raymond poincaré, garches, 92380, france	1	0	0
526	ap-hp, department of psychiatry of mondor university hospital, dhu pepsy, university of paris-est-créteil, créteil, france	1	264	3
527	ap-hp, department of psychiatry, louis mourier hospital, colombes, inserm u894 université paris diderot, sorbonne paris cité faculté de médecine, france	1	39	20
528	ap-hp, department of psychiatry, louis mourier hospital, colombes, inserm u894, université paris diderot, sorbonne paris cité, faculté de médecine, france	2	54	36
529	ap-hp, gh saint-louis - lariboisière–f. widal, pôle de psychiatrie et de médecine addictologique, paris cedex 10, 75475, france	1	11	5
530	ap-hp, groupe henri mondor-albert chenevier, pôle de psychiatrie, 94000 créteil cedex, 40, rue de mesly, france	1	211	2
531	ap-hp, groupe henri mondor-albert chenevier, pôle de psychiatrie, créteil, f-94000, france	1	20	4
532	ap-hp, hepato-gastroenterology and nutrition, antoine-béclère hospi-tal, clamart, france	1	20	11
533	ap-hp, hôpital corentin-celton, dmu psychiatrie et addictologie, département de psychiatrie, france	1	11	8
534	ap-hp, hôpital louis mourier (paris vii), service de psychiatrie, 92700 colombes, 178 rue des renouillers, france	1	26	3
535	ap-hp, hôpitaux universitaires henri mondor, dhu pepsy, pôle de psychiatrie et d’addictologie, créteil, france	1	34	7
536	apc microbiome institute, university college cork, cork, ireland	2	338	5
537	apc microbiome ireland, university college cork, cork, ireland	4	451	36
538	apc microbiome ireland, university college cork, cork, t12 k8af, ireland	1	66	2
539	apc microbiome ireland, university college cork, ireland	1	52	3
540	apc, st. moritz, switzerland	1	5	3
541	aphp, henri mondor-albert chenevier hospitals, department of psychiatry, creteil, france	1	497	3
542	aphp, paul brousse hospital, department of psychiatry and addictology, villejuif, f-94800, france	1	4	2
543	apoteket ab, stockholm, sweden	1	42	4
544	apotex inc., toronto, on, canada	1	32	0
545	appalachian behavioral healthcare, cambridge psychiatric hospital, cambridge, oh 43725, 66737 old 21 road, united states	2	63	3
546	appalachian behavioral healthcare, cambridge psychiatric hospital, cambridge, oh, united states	1	57	1
547	appalachian behavioral healthcare, southeast psychiatric hospital, athens, oh, united states	1	6	2
548	applied biotechnology research center, baqiyatallah university of medical sciences, tehran, iran	1	108	5
549	applied microbial and health biotechnology institute, cape peninsula university of technology, symphony way, bellville, cape town, 7535, south africa	1	0	2
550	applied molecular genomics group, vib department of molecular genetics, university of antwerp, antwerp, belgium	1	37	4
551	applied pharmacology to membrane biology and signal transduction mechanisms research group (biofarma, school of pharmacy, university of santiago de compostela, e-15782 santiago de compostela, spain	1	34	5
552	applied schizophrenia division, university of melbourne, sunshine hospital, melbourne, vic., australia	1	30	1
553	aprn, valley mental health, salt lake city, ut 84101, 1020 s. main st., united states	1	31	1
554	apt foundation methadone program, department of psychiatry, yale university school of medicine, united states	1	21	7
555	aptiv solutions, raleigh, nc, united states	1	12	3
556	arabian gulf university, bahrain	1	1	1
557	arara 30026, p.o. box 1217, israel	1	48	1
558	arbor scientia, carlsbad, ca 92008, 1930 palomar point way, suite 103, united states	1	26	2
559	arbor scientia, carlsbad, ca 92008, united states	1	74	1
560	arbour counseling center, lowell, ma, united states	1	25	4
561	area de psicobiologia, universitat jaume i, castelló, spain	1	20	2
562	area of neurosciences, department of biology of reproduction, cbs, universidad autonoma metropolitana-iztapalapa, mexico city, mexico	1	23	3
563	area psychosis, new york state psychiatric institute, new york, ny, united states	1	4	7
564	arena pharmaceuticals, san diego, ca 92121, 6166 nancy ridge drive, united states	1	50	0
565	arian salamat counseling and nursing cervices center, tehran, iran	1	83	6
566	arian salamat counselling and nursing services centre, tehran, iran	1	63	5
567	aristo pharma gmbh, wallenroder str. 8-10, berlin, 13435, germany	1	50	2
568	aristotelian university, thessaloniki, greece	1	17	19
569	aristotle university of thessaloniki, school of medicine, 3rd department of psychiatry, 55535 pylaia, thessaloniki, 6 odysseos street, greece	1	5	0
570	aristotle university of thessaloniki, thessaloniki, greece	1	27	0
571	arizona alzheimer's disease consortium, phoenix, az, united states	1	102	5
572	arizona chemical b.v., transistorstraat 16, 1322 ce almere, netherlands	1	21	12
573	arizona health care cost containment system, phoenix, az, united states	1	0	2
574	arizona state university, tempe, 85287, az, united states	1	8	9
575	arizona state university, tempe, az, united states	1	11	2
576	arlington, va 22209, 1000 wilson blvd., united states	1	16	0
577	arnold and marie schwartz college of pharmacy and health sciences, long island university, brooklyn, ny, united states	1	22	4
578	arnold lodge (rsu), leicester, united kingdom	1	14	6
579	arq psychotruama research group, diemen, netherlands	1	28	2
580	arthritis program, university health network, toronto, on, canada	1	2	5
581	arvid carlsson institute, institute of clinical neuroscience, göteborg university, göteborg, medicinaregatan 11, sweden	1	64	4
582	asante behavioral health, medford, or, united states	1	9	1
583	asclepios bioresearch (uk) ltd., london ec3m 8aa, 10 philpot lane, united kingdom	1	76	1
584	asklepios-med bt., h-6722 szeged, kossuth lajos sgt. 23, hungary	1	79	7
585	asl salerno 1 - mental health center, n. 4, cava de' tirreni (salermo), italy	1	37	1
586	asociación psiquiátrica de américa latina (apal), df, brasília, brazil	1	2	4
587	aspag, csm licata, licata, italy	1	4	3
588	assertive outreach team and psychiatric intensive care unit, birmingham and solihull mental health foundation trust, united kingdom	1	3	2
589	assistance publique des hopitaux de paris (ap-hp), ghu saint-louis – lariboisiere – fernand widal, dmu neurosciences, departement de psychiatrie et de medecine addictologique, inserm umrs 1144, universite de paris, paris, france	1	1	14
590	assistance publique des hôpitaux de marseille (ap-hm), pôle universitaire de psychiatrie, marseille, france	2	54	36
591	assistance publique hpitaux de paris, european georges pompidou hospital, pharmacology and toxicology department, paris, france	1	12	3
592	assistance publique hôpitaux de marseille, service epidémiologie et economie de la santé, marseille, france	1	8	2
593	assistant professor of psychiatry and behavioral sciences, division of child and adolescent psychiatry, the johns hopkins medical institutions, baltimore, md, 600 n. wolfe street, united states	1	61	1
594	assistant surgeon, nagapattinam, tamilnadu, esi dispensary, india	1	5	1
595	assiut university hospital, department of neurology and psychiatry, assiut, p.o.box 71516, egypt	1	17	0
596	assoc. of private health insurances, cologne, germany	1	21	2
597	associate laboratory i4hb - institute for health and bioeconomy, faculty of pharmacy, university of porto, porto, 4050-313, portugal	1	6	2
598	associate professor, division of child and adolescent psychiatry, the johns hopkins medical institutions, baltimore, md, 600 n. wolfe street, united states	1	61	1
599	associates 2000 pa, rochester, mn, united states	1	22	4
600	association for the improvement of mental health programmes, geneva, switzerland	2	10	46
601	association l'elan retrouvé, paris, france	1	3	3
602	association of argentinean psychiatrists, argentina	1	242	81
603	association of psychiatrists in nigeria, nigeria	1	242	81
604	associazione di psicofarmacologia, milan, italy	1	32	2
605	associação brasileira de psiquiatria (abp), rio de janeiro, rj, brazil	1	2	4
606	asst lariana, como, italy	1	4	3
607	assurerx health, inc., department of science, mason, oh 45040, 6030 s. mason-montgomery road, united states	1	65	3
608	astellas pharma global development, global medical science, cns and pain, northbrook, il, united states	1	13	0
609	astellas research institute of america llc, skokie, il, united states	1	25	3
610	aston medical school, aston university, birmingham, united kingdom	1	1	2
611	aston pharmacy school, aston university, birmingham, united kingdom	1	1	8
612	astra arcus ab, preclin. research and development, s-151 85 södertälje, sweden	1	28	2
613	astra arcus ab, södertälje, sweden	1	14	1
614	astra neuroscience research unit, london, wc1n1pj, 1 wakefield street, united kingdom	1	29	1
615	astrazeneca ab, södertälje, sweden	1	35	1
616	astrazeneca gmbh, wedel, germany	1	16	4
617	astrazeneca medical department, madrid, spain	1	25	3
618	astrazeneca neuroscience imed, cambridge, ma, united states	1	11	1
619	astrazeneca pharmaceuticals lp, wilmington, de, united states	1	14	3
620	astrazeneca pharmaceuticals, cns discovery, wilmington, de 19850, po box 15437, united states	1	35	3
621	astrazeneca pharmaceuticals, wilmington, de, united states	1	147	2
622	astrazeneca plc, sodertalje, sweden	1	7	7
623	astrazeneca, macclesfield, cheshire, alderley park, united kingdom	1	77	1
624	astrazeneca, r and d montréal, in-vitro biology and dmpk department, ville st. laurent, que., canada	1	76	1
625	astrazeneca, södertälje, sweden	1	97	4
626	astrazeneca, wilmington, de, united states	2	99	7
627	at whipps cross university hosptial nhs trust, united kingdom	1	2	2
628	athens dromokaition psychiat. hosp., athens, greece	1	23	1
629	athens university medical school, department of psychiatry, univ. mental hlth. res. institute, athens, greece	1	42	9
630	athens university medical school, psychiatric clinic, eginition hospital, 11528 athens, vas. sophias 74, greece	1	10	0
631	athens university medical school, psychiatric clinic, eginition hospital, 11528 athens, vass. sophias 74, greece	1	8	0
632	athens university medical school, psychiatric clinic, eginition hospital, athens 11528, vas sophias 74, greece	1	8	0
633	athens university medical school, psychiatric clinic, eginition hospital, gr-11528 athens, vas sophias 74, greece	1	25	0
634	athens university medical school, psychiatric clinic, eginition hospital, greece	1	17	1
635	athens university, department of psychiatry, eginition hospital, athens, greece	1	3	0
636	athens university, medical school, eginition hospital, athens 115 28, vas. sophias 74, greece	1	14	0
637	athinoula a. martinos center for biomedical imaging, charlestown, ma, united states	1	64	1
638	athinoula a. martinos center for biomedical imaging, department of radiology, massachusetts general hospital, harvard medical school, charlestown, 02129, ma, united states	1	47	1
639	athinoula a. martinos center for biomedical imaging, department of radiology, massachusetts general hospital, harvard medical school, ma, united states	1	21	1
640	atkinson morley regional neuroscience centre, st george's university hospitals nhs foundation trust and institute of medical and biomedical education, st. george's university of london, united kingdom	1	25	10
641	atkinson morley regional neuroscience centre, st. george's university hospitals nhs foundation trust, london, united kingdom	1	36	2
642	atlant, korsakoff centre of expertise, kuiltjesweg 1, beekbergen, 7361 tc, netherlands	1	1	2
643	atlanta center for cognitive therapy, atlanta, ga, united states	1	1	6
644	atlanta center for medical research, atlanta, ga, united states	1	2	1
645	atlanta department of veterans affairs medical center, decatur, ga, united states	1	29	5
646	atlanta institute of medicine & research, atlanta, ga, united states	1	18	5
647	atlanta va medical center, decatur, ga, united states	1	47	6
648	atlanta veteran’s affairs medical center, atlanta, ga, united states	1	3	19
649	atlanta, ga 30322, 36 eagle row, united states	1	4	32
650	atlanta, ga, united states	1	26	4
651	atlanta, ga., united states	1	10	1
652	atp clinical research, costa mesa, ca, united states	1	6	15
653	attending faculty psychiatrist, banner-university medical center, phoenix, az, united states	1	11	2
654	attending oral medicine specialist oral medicine unit, chaim sheba medical center, ramat-gan, israel	1	1	4
655	attending oral medicine specialist, department of oral medicine, sedation and maxillofacial imaging, hebrew university-hadassah, school of dental medicine, jerusalem, israel	1	1	4
656	attention deficit disorder program, institute of psychiatry, federal university of rio de janeiro, rio de janeiro, brazil	1	22	3
657	augenärzte am städel, hans-thoma-straße 24, frankfurt am main, 60596, germany	1	5	5
658	austin hospital, university of melbourne, heidelberg, vic, australia	1	1	5
659	austin state hospital, austin, tx, united states	1	308	3
660	austin-repatriation hospital, department of psychiatry, repatriation hospital site, heidelberg, vic. 3084, banksia street, australia	1	7	1
661	austin/repatriation medical centre, heidelberg, vic. 3084, studley road, australia	1	52	2
662	austin/repatriation medical centre, melbourne, vic., australia	1	12	0
663	australia	1	0	0
664	australia international health institute, carlton, vic, australia	1	8	4
665	australian and new zealand intensive care research centre, school of public health and preventive medicine, monash university, melbourne, vic, australia	1	8	7
666	australian catholic university - sydney, sydney, australia	1	3	7
667	australian genome research facility, melbourne, vic. 3050, australia	1	41	3
668	australian institute for suicide research and prevention, griffith university, world collaborating centre for suicide research and training, brisbane, qld, australia	1	80	1
669	australian institute of tropical health and medicine, james cook university, townsville, qld, australia	1	8	3
670	australian national university, canberra hospital, garran, act 2605, australia	1	2	0
671	australian nuclear science and technology organization (ansto), nsw, australia	1	63	2
672	australian research centre for the health of women and babies (arch), robinson institute, school of paediatrics and reproductive health, the university of adelaide, north adelaide, sa 5006, ground floor, norwich centre, 55 king william road, australia	1	43	3
673	austria	1	0	0
674	austrian association of psychiatry and psychotherapy, austria	1	242	81
675	autonoma university of madrid, madrid, spain	1	168	6
676	aventis pharma, vitry-sur-seine, france	1	13	4
677	aventis pharmaceuticals, cns pharmacology, bridgewater, nj 08807, route 202-206, united states	1	30	0
678	aventis, route 202-206, p.o. box 6800, bridgewater, nj 08807-0800, united states	1	200	2
679	avera behavioral health center, sioux falls, sd, united states	1	4	4
680	avery d. weisman psychiatry consultation service, massachusetts general hospital, boston, united states	1	35	5
681	avicennet, tehran, iran	1	0	6
682	avineuro llc, moscow, russian federation	1	33	3
683	avineuro pharmaceuticals inc., san diego ca, united states	1	33	3
684	avineuro pharmaceuticals, inc., hallandale beach, fl, united states	1	8	6
685	avineuro pharmaceuticals, inc., hallandale beach, united states	1	12	4
686	avon and wiltshire mental health partnership nhs trust, bristol, united kingdom	1	2	2
687	avon and wiltshire partnership nhs mental health trust, bristol, united kingdom	1	0	7
688	axe neurosciences, centre de recherche du chu de québec, université laval, québec city, qc, canada	2	42	16
689	az alma, eeklo, belgium	1	9	13
690	azad university, tehran, iran	1	0	1
691	azerbaijan psychiatric association, azerbaijan	1	242	81
692	azienda ospedaliera, ospedale niguarda ca' granda, dipartimento di salute mentale, centro per l'individuazione e l'intervento precoce nelle psicosi-programma2000, milan, italy	1	29	1
693	azienda ospedaliero-universitaria s. anna ferrara, ferrara, italy	1	36	1
694	azienda sanitaria per i servizi sanitari? provincia autonoma di trento, dipartimento di salute mentale, via degasperi, 79, trento, 38123, italy	1	49	5
695	azienda sanitaria universitaria giuliano-isontina–asugi, uco clinica psichiatrica, trieste, italy	1	1	6
696	azienda unità sanitaria locale di forlì, ospedale 'g.b. morgagni - l. pierantoni', department of dermatology, 47100 forlì, italy	1	14	1
697	azienda unità sanitaria locale di forlì, ospedale 'g.b. morgagni - l. pierantoni', department of mental health, 47100 forlì, piazza solieri 1, italy	1	14	1
698	azrieli faculty of medicine, bar ilan university, 8 henrietta szold st, safed, 1311502, israel	1	57	2
699	azusa pacific university, united states	1	25	4
700	b-2340 beerse, turnhoutseweg 30, belgium	1	26	0
701	b. c. roy technology hospital, indian institute of technology, kharagphur - 721302, india	1	0	0
702	b., s./t. mental hlth. nhs trust, cromwell house, eccles, salford, m30 0gt, cromwell road, united kingdom	1	547	3
703	b., s./t. mental hlth. nhs trust, salford, united kingdom	1	547	3
704	b.-m. squibb pharmaceut. res. inst., department of neuroscience, wallingford, ct 06492, 5 research parkway, united states	1	97	1
705	b.-m. squibb pharmaceut. res. inst., neuroscience biology, wallingford, ct, united states	1	97	1
706	b.b. brodie dept. of neuroscience, university of cagliari, 09100 cagliari, via porcell 4, italy	1	0	2
707	b.b. brodie dept. of neuroscience, university of cagliari, cagliari, italy	1	0	2
708	b.s.a. college of engineering & technology, uttar pradesh, mathura, india	1	4	2
709	back of the yards algae sciences, chicago, il, united states	1	11	2
710	bacon hall, tufts university, medford, ma 02155, 530 boston avenue, united states	1	99	2
711	bakar computational health sciences institute, university of california, san francisco, san francisco, ca, united states	1	10	4
712	baker idi heart and diabetes institute, melbourne vic 8008, po box 6492 st kilda road central, australia	1	22	0
713	bakirkoy ruh sagligi ve sinir hastaliklari egitim ve arastirma hastanesi, bakirköy, istanbul, turkey	1	4	0
714	bakirköy mental hospital, istanbul, turkey	1	47	1
715	bakirköy prof. mazhar osman res./train. hosp. for psychiat.,, 34747 bakirköy istanbul, turkey	1	6	6
716	ballarat health services, ballarat, vic. 3350, australia	1	1	0
717	baltimore, md, united states	1	0	0
718	bambino gesù children's hospital irccs, rome, italy	1	39	2
719	bandim health project, indepth network, bissau, apartado 861, guinea-bissau	1	129	2
720	bangalore - 560 080, karnataka, sadashiva nagar, india	1	49	6
721	bangladesh association of psychiatrists, bangladesh	1	242	81
722	banner alzheimer's institute, arizona alzheimer's disease consortium, phoenix, az, united states	1	102	5
723	banner alzheimer's institute, department of psychiatry, university of arizona, united states	1	102	5
724	banner alzheimer's institute, phoenix, az 85006, 901 east willetta st, united states	1	13	0
725	banner alzheimer's institute, phoenix, az, united states	1	11	2
726	banner-university medical center, phoenix, az, united states	1	11	2
727	banting and best diabetes centre (bbdc), university of toronto, toronto, canada	1	0	4
728	banting and best diabetes centre, university of toronto, toronto, on, canada	1	55	5
729	baptist memorial hospital, memphis, tn, united states	1	85	2
730	bar-ilan university, ramat gan, israel	1	14	9
731	barbados association of psychiatrists, barbados	1	242	81
732	barbara & corbin j. robertson jr. chair in psychiatry, menninger department of psychiatry, division of community psychiatry, family & community medicine, baylor college of medicine, houston, 77030, tx, united states	1	1	2
733	barcelona clinic schizophrenia unit, hospital clinic of barcelona, spain	1	9	31
734	barcelona clinic schizophrenia unit, institute of neurosciences, university of barcelona, idibaps, barcelona, catalonia, spain	1	7	6
735	barcelona clínic schizophrenia unit (bcsu), neuroscience institute, hospital clínic de barcelona, institut d'investigacions biomèdiques august pi i sunyer (idibaps), centro de investigación biomédica en red en salud mental (cibersam), department of medicine, university of barcelona, barcelona, spain	1	6	4
736	barcelona clínic schizophrenia unit, hospital clínic de barcelona, barcelona, spain	1	31	28
737	barcelona genotyping node, cegen-crg, parc de recerca biomedica de barcelona, barcelona, spain	1	18	16
738	barcelona imaging group sl, e-08193-barcelona, gabriel y galan, 21, spain	1	9	1
739	barcelonaβeta brain research center, pasqual maragall foundation, barcelona, 08005, spain	1	18	2
740	bariatric surgery program, university health network, toronto, m5t 2s8, on, canada	1	10	7
741	barkikoy prof. mazhar osman research/training hospital for psychiatry, neurology/neurosurg., 34747 bakirköy, istanbul, turkey	1	6	6
742	barnet enfield and haringey mental health nhs trust, london, united kingdom	1	3	2
743	barnet hospital, barnet, hertfordshire, united kingdom	1	22	7
744	barnet, enfield and haringey mental health nhs trust, st.ann’s hospital, st.ann’s road, london, n15 3 th, united kingdom	1	6	12
745	barrow hospital, barrow gurney, bristol bs19 3sg, united kingdom	1	1	0
746	barrow neurological institute, department of neurobiology, dignity health, st. joseph’s hospital and medical center, phoenix, az, united states	1	11	2
747	barrow neurological institute, phoenix, az, united states	1	0	1
748	barrow neurological institute, thomas rd, phoenix, 85013, az, united states	1	8	9
749	barts health nhs trust, london, united kingdom	1	7	1
750	barwon health and the geelong clinic, melbourne university, australia	1	89	9
751	barwon health, geelong, vic, australia	1	4	2
752	barzilai medical center, ashkelon, israel	1	21	3
753	basel ch-4002, lichtstrasse 35, wsj-360.405, switzerland	1	41	1
754	basel pharmacoepidemiology unit, division of clinical pharmacy and epidemiology, department of pharmaceutical sciences, university of basel, spitalstrasse 26, basel, 4031, switzerland	1	49	4
755	bashkir state university, ufa, 450076, russian federation	1	6	4
756	basic research and advanced investigations in neurology, experimental research centre, hospital de clínicas de porto alegre, brazil	1	20	3
757	basic research and advanced investigations in neurosciences, brain laboratory, hospital de clínicas de porto alegre, brazil	1	7	5
758	basic research and advanced investigations in neurosciences, experimental research center, hospital de clínicas de porto alegre, porto alegre, brazil	1	3	5
759	basque institute of legal medicine, spain	1	27	4
760	bateman horne center, salt lake city, ut, united states	1	3	1
761	baycrest centre for geriatric care, toronto, ont. m6a 2e1, 3560 bathurst st., canada	1	289	1
762	bayer cropscience ag, bcs-r-1 chemistry insecticides, d-40789 monheim, alfred-nobel-strasse 50, germany	1	109	2
763	bayer schering pharma ag, gdd-gtr-td- tasip, d-13342 berlin, muellerstr. 178, germany	1	47	3
764	bayer vital gmbh, leverkusen, germany	1	52	4
765	baylor college of medicine, department of neurology, 7200 cambridge st, houston, 77030, tx, united states	2	0	0
766	baylor college of medicine, department of psychiatry, houston, tx, united states	1	2	5
767	baylor college of medicine, houston, texas, united states	1	1	2
768	baylor college of medicine, houston, tx, united states	4	147	9
769	baylor college of medicine, houston, united states	1	38	12
770	baylor college of medicine, parkinson's disease center and movement disorders clinic, department of neurology, houston, tx 77030, 6550 fannin, united states	1	125	1
771	baylor college of medicine, parkinson's disease center and movement disorders clinic, department of neurology, houston, tx, united states	1	125	1
772	baylor medical college, houston, tx, united states	1	42	3
773	baylor university, school of medicine, united states	1	24	7
774	baylor university, state university of new york, james a. haley vamc, stony brook, ny, united states	1	24	2
775	baylor university, waco, tx, united states	1	5	2
776	bbmrinl: infrastructure for the application of metabolomics technology in epidemiology, leiden, netherlands	1	36	9
777	bc children’s hospital research institute, university of british columbia, 950 west 28th ave., vancouver, v5z 4h4, bc, canada	1	3	4
778	bc mental health and addictions research institute, department of psychiatry, university of british columbia, vancouver, bc, canada	1	10	2
779	bc neuropsychiatry program, bc, canada	1	8	1
780	bcpp, s413 pharmacy building, iowa city, ia 52242, united states	1	147	3
781	be'er ya'akov mental health center, be'er ya'akov, israel	1	88	5
782	be'er yaakov mental health center, magen prison, ramleh 72100, p.o. box 2058, israel	1	108	3
783	beatson oncology centre, western infirmary, glasgow g11 6nt, united kingdom	1	2	0
784	bebensee schizophrenia research unit, department of psychiatry, university of alberta, edmonton, alta. t6g 2r7, canada	1	62	0
785	beckley foundation, beckley park, oxford, united kingdom	1	203	3
786	beckley foundation, oxford, beckley park, united kingdom	1	165	5
787	bedford va medical center, bedford, ma, united states	1	87	7
788	bedfordshire centre for mental health research, university of cambridge, cambridge, united kingdom	1	9	6
789	beecham pharmaceuticals, cns, united kingdom	1	98	10
790	beekeeping development application and research center, sivas cumhuriyet university, sivas, turkey	1	10	18
791	beer yaakov mental health center, beer yaakov 70350, israel	1	6	4
792	beer yaakov mental health center, beer yaakov 70350, po box 1, israel	1	20	2
793	beer yaakov mental health center, beer yaakov, israel	2	73	6
794	beer yaakov mental health center, sackler faculty of medicine, tel aviv university, israel	1	115	10
795	beer yaakov-ness ziona mental health center, 74100 ness ziona, po box 1, israel	1	23	2
796	beer yaakov-ness ziona mental health center, beer yaakov, israel	1	39	3
797	beer-sheba mental health center, beersheba, p.o. box 4600, israel	1	3	1
798	beer-sheva mental health center, beer-sheva, 84170, po box 4600, israel	1	16	1
799	beer-yaacov - ness-ziona mental health center, bat-yam, israel	1	4	5
800	beer-yaakov mental health center, beer yaakov 70350, po box 1, israel	1	4	1
801	beer-yakov mental health center, affiliation of the sackler faculty of medicine, tel-aviv university, tel aviv, israel	1	13	4
802	beer-yakov mental health center, beer-yakov, israel	1	51	3
803	beersheba mental health center, beersheba, p.o. box 4600, israel	1	457	1
804	beersheva mental health center, beer-sheva, 84170, po box 4600, israel	1	7	1
805	beersheva mental health center, beersheva, israel	1	8	5
806	beersheva mental health center, beersheva, po box 4600, israel	1	124	0
807	beersheva mental health center, ben gurion university of the negev, beershevaisrael	1	17	3
808	beersheva mental health center, faculty of health sciences, ben-gurion university of the negev, beersheva, israel	1	170	3
809	behav. neurosci. grp., sch. psychol., university of leicester, leicester le1 7rh, university road, united kingdom	1	6	3
810	behav. neuroscience research center, charles r. drew univ. med. and sci., los angeles, ca, united states	1	6	3
811	behav. psychopharmacology res. lab., mclean hospital, harvard medical school, belmont, ma 02478, 115 mill street, united states	1	25	5
812	behav. psychopharmacology res. lab., mclean hospital, harvard medical school, belmont, ma, united states	1	25	5
813	behavior management treatment program, north texas state hospital, vernon, tx, united states	1	9	1
814	behavioral and clinical neuroscience institute, department of experimental psychology, university of cambridge, cambridge cb2 3eb, united kingdom	1	1272	0
815	behavioral endocrinology branch, nimh, building 10, bethesda, md 20892-1277, 10 center drive, united states	1	20	0
816	behavioral health and clinical neurosciences division, northwest hepatitis c resource center, portland va medical center, portland, or 97239, 3710 sw us veteran's hospital rd, united states	1	76	6
817	behavioral health and clinical neurosciences division, nw hepatitis c resource center, portland va medical center, portland, or 97239, united states	1	104	2
818	behavioral health and clinical neurosciences division, portland va medical center, department of psychiatry, portland, or 97239, united states	1	104	2
819	behavioral health and clinical neurosciences division, portland veterans affairs medical center (vamc), portland, or, united states	1	76	6
820	behavioral health and neurosciences division, portland va medical center, portland, or, united states	1	32	4
821	behavioral health care line, new mexico va health care system, albuquerque, nm, united states	1	17	3
822	behavioral health care line, visn 2, veterans administration, syracuse, ny, united states	1	3	4
823	behavioral health service line, veterans affairs pittsburgh health system, pittsburgh, pa, united states	1	6	2
824	behavioral health service, department of veterans affairs medical center, philadelphia, pa 19104, east-116a, university avenue, united states	1	21	3
825	behavioral health services, denver health medical center, denver, co, united states	1	7	2
826	behavioral health services, lutheran hospital, cleveland clinic, 1730 w. 25th street 5e, cleveland, 44113, oh, united states	1	23	1
827	behavioral health services, mcdonald army health center, fort eustis, va, united states	1	3	5
828	behavioral neuroimaging laboratory, mclean hospital, belmont, ma, united states	1	7	4
829	behavioral neurology unit, department of neurology, beth israel deaconess medical center, boston, ma, united states	1	147	5
830	behavioral neuropharmacology and neuroimaging laboratory on addictions, clinical research institute on addictions, department of pharmacology and toxicology, jacobs school of medicine and biosciences, state university of new york at buffalo, buffalo, 14203, ny, united states	1	16	17
831	behavioral neuroscience and drug development, institute of pharmacology, polish academy of sciences, 31-343 kraków, 12 smetna street, poland	1	66	1
832	behavioral neuroscience division, department of psychological sciences, university of connecticut, storrs, 06269-1020, ct, united states	1	20	2
833	behavioral neuroscience laboratory, mental health research institute of victoria, parkville, vic. 3052, 155 oak street, australia	1	30	1
834	behavioral neuroscience laboratory, mental health research institute, parkville, 3052, australia	1	0	5
835	behavioral neuroscience laboratory, mental hlth. res. inst. of victoria, parkville, vic. 3052, 155 oak st., australia	1	61	0
836	behavioral neuroscience section, department of cell biology and neurosciences, istituto superiore di sanità, viale regina elena, 299, rome, i-00161, italy	1	39	2
837	behavioral pharmacology laboratory, department of psychology, university of south carolina, columbia, sc, united states	1	14	1
838	behavioral research and aids, national institute of mental health, bethesda, md, united states	1	148	1
839	behavioral sciences institute, alain hospital, al ain, po box 1006, united arab emirates	1	10	3
840	behavioral sciences institute, alain hospital, al ain, united arab emirates	1	49	3
841	behavioral sciences research center, isfahan university of medical sciences, isfahan, iran	1	10	9
842	behavioural and brain sciences unit, gosh institute of child health, university college london, london, united kingdom	1	142	28
843	behavioural and clinical neuroscience institute and department of psychology, cambridge university, cambridge, united kingdom	1	152	40
844	behavioural and clinical neuroscience institute, department of psychology, university of cambridge, cambridge, united kingdom	1	10	3
845	behavioural and clinical neuroscience institute, university of cambridge, cambridge, cb2 3eb, united kingdom	1	55	5
846	behavioural and clinical neuroscience institute, university of cambridge, cambridge, united kingdom	1	17	3
847	behavioural and clinical neuroscience institute, university of cambridge, downing street, cambridge, cb2 3eb, united kingdom	1	4	4
848	behavioural and clinical neuroscience institute, university of cambridge, downing street, cb2 3eb, united kingdom	1	38	2
849	behavioural and clinical neuroscience institute, university of cambridge, united kingdom	1	52	7
850	behavioural and clinical neuroscience unit (bcni), university of cambridge, cambridge, united kingdom	1	90	3
851	behavioural basis of health, school of applied psychology, griffith university, southport, qld 4215, parklands drive, australia	1	76	2
852	behavioural basis of health, school of psychology, griffith university, southport, australia	1	76	2
853	behavioural genetics group, mrc centre for neuropsychiatric genetics and genomics, neuroscience and mental health research institute, cardiff university, cardiff, united kingdom	1	12	1
854	behavioural genetics group, schools of medicine and psychology, cardiff university, cardiff, united kingdom	1	19	2
855	behavioural neurobiology laboratory, swiss fed. inst. of technol. zurich, ch-8603, schwerzenbach, schorenstrasse 16, switzerland	1	43	1
856	behavioural neuroscience laboratory, brain and mind research institute, university of sydney, camperdown, sydney, nsw, australia	1	88	0
857	behavioural neuroscience laboratory, florey institute of neuroscience and mental health, university of melbourne, vic 3010, at genetics lane on royal parade, australia	1	5	1
858	behavioural neuroscience laboratory, mental health research institute of victoria, melbourne, 155 oak street, australia	1	82	5
859	behavioural neuroscience laboratory, mental health research institute of victoria, melbourne, australia	1	30	1
860	behavioural neuroscience laboratory, mental health research institute of victoria, melbourne, vic. 3052, 155 oak street, parkville, australia	1	57	2
861	behavioural neuroscience laboratory, mental health research institute of victoria, melbourne, vic., australia	1	30	1
862	behavioural neuroscience laboratory, mental health research institute of victoria, parkville, vic 3052, 155 oak street, australia	3	48	5
863	behavioural neuroscience laboratory, mental health research institute of victoria, parkville, vic, australia	1	8	5
864	behavioural neuroscience laboratory, mental health research institute of victoria, parkville, vic. 3052, 155 oak street, australia	7	164	13
865	behavioural neuroscience laboratory, mental health research institute of victoria, parkville, vic. 3052, australia	1	18	1
866	behavioural neuroscience laboratory, mental health research institute of victoria, parkville, vic., australia	3	84	8
867	behavioural neuroscience laboratory, mental health research institute, melbourne, vic 3052, 155 oak street, australia	1	33	2
868	behavioural neuroscience laboratory, mental health research institute, parkville, melbourne, australia	1	77	2
869	behavioural neuroscience laboratory, mental health research institute, parkville, vic 3052, 155 oak street, australia	1	15	2
870	behavioural neuroscience laboratory, mental health research institute, parkville, vic, australia	1	2	2
871	behavioural neuroscience laboratory, mental health research institute, university of melbourne, melbourne, vic 3010, australia	1	10	1
872	behavioural neuroscience laboratory, mental health research institute, university of melbourne, parkville, vic, australia	1	10	2
873	behavioural neuroscience laboratory, mental hlth. res. inst. of victoria, parkville, australia	1	43	3
874	behavioural neuroscience laboratory, mental hlth. res. inst. of victoria, parkville, vic. 3052, 155 oak street, australia	2	75	4
875	behavioural neuroscience laboratory, school of psychology, psychiatry and psychological medicine, monash university, melbourne, vic, australia	1	39	6
876	behren's inc., united states	1	0	1
877	beighton hospital, sheffield s20 1nz, seveneir's road, united kingdom	1	15	1
878	beijing anding hospital, beijing institute for brain disorders, capital medical university, beijing, 100088, china	1	2	16
879	beijing anding hospital, capital medical university, beijing, china	1	8	10
880	beijing capitol university, department of physiology, beijing, china	1	54	3
881	beijing center for health development studies, beijing, china	1	16	3
882	beijing children's hospital, capital medical university, beijing, 100191, china	1	6	6
883	beijing huilongguan hospital, beijing, 102200, china	1	2	16
884	beijing huilongguan hospital, peking university huilongguan clinical medical school, beijing, china	1	9	1
885	beijing key laboratory of cancer invasion and metastasis research, department of histology and embryology, school of basic medical sciences, advanced innovation center for human brain protection, capital medical university, beijing, 100069, china	1	5	4
886	beilinson medical center, gehah psychiatric hospital, petah tiqva 49 100, po box 102, israel	1	41	0
887	bekhterev national medical research center for psychiatry and neurology, st. petersburg, 192019, russian federation	1	2	3
888	bekhterev national research medical center for psychiatry and neurology, russian ministry of health, st. petersburg, russian federation	1	1	1
889	bekhterev psychoneurological research institute, st. petersburg, russian federation	1	10	7
890	belarusian state medical university, department of psychiatry and medical psychology, dolginovsky tract, 152, minsk, 220053, belarus	1	16	3
891	belfast city hospital trust, belfast bt9 7ab, lisburn road, united kingdom	1	28	0
892	belfast, northern ireland, united kingdom	1	8	0
893	belgium	6	138	0
894	belle idée hospital, 1225 chêne bourg, 2 chemin du petit bel air, switzerland	1	13	2
895	bellevue hospital center, new york, ny 10016, 462 first avenue, 17s #21, united states	1	12	0
896	bellevue hospital children's comprehensive psychiatric emergency program, department of child and adolescent psychiatry, nyu school of medicine, 462 1st avenue, new york, 10016, ny, united states	1	44	3
897	bellin health psychiatric center, green bay, wi, united states	1	0	3
898	belmont private hospital, department of psychiatry, belmont private hospital, brisbane, qld, australia	1	1	3
899	belmont, ma 02478-1041, 115 mill st., united states	1	0	4
900	ben gurion university of negev, beer sheva 84105, po box 653, israel	1	21	3
901	ben gurion university, department of medicine h, faculty of health sciences, beer sheva, israel	1	119	2
902	ben taub general hospital, houston, 77030, tx, united states	1	0	0
903	ben-gurion university of the negev, department of clinical pharmacology, faculty of health sciences, beer-sheva 84105, po box 653, israel	1	5	3
904	ben-gurion university of the negev, department of geriatrics and memory clinic, mental health center, beersheva 84170, po box 4600, israel	1	1	1
905	ben-gurion university of the negev, psychiatry research unit, department of clinical biochemistry, beer-sheva 84170, po box 4600, israel	1	5	3
906	ben-gurion university of the negev, school for community health professions, faculty of health sciences, beer-sheva 84105, po box 653, israel	1	5	3
907	bendheim parkinson's disease center, mount sinai school of medicine, new york, ny, united states	1	702	4
908	benito menni, mental health care institute, barcelona, antoni pujadas 38, spain	1	24	1
909	benito menni, mental health care institute, barcelona, spain	1	12	2
910	benito menni, mental health care institute, hospital de granollers, barcelona, spain	1	258	2
911	berand ltd., novaucd, belfield innovation park, university college dublin, dublin 4, ireland	1	21	12
912	bereich experimentelle psychiatrie, universitätsklinik carl gustav carus an der technischen universität dresden, d-01307 dresden, fetscherstrasse 74, germany	1	16	0
913	berenson-allen center for noninvasive brain stimulation, behavioral neurology unit, department of neurology, beth israel deaconess medical center, boston, ma, united states	1	147	5
914	berenson-allen center for noninvasive brain stimulation, beth israel deaconess medical center, harvard medical school, boston, ma, united states	3	83	16
915	bergen center for brain plasticity, haukeland university hospital, bergen, norway	1	4	5
916	bergen new bridge medical center, paramus, nj, united states	1	2	1
917	berkshire consulting group, lenox, ma, united states	1	4	4
918	berlex biosciences, richmond, ca 948806, 2600 hilltop drive, united states	1	0	0
919	berlin lithium clinic, germany	1	43	2
920	berlin school of mind and brain, bernstein center for computational neuroscience (bccn), clinic for psychiatry and psychotherapy, charité - universitätsmedizin, berlin, germany	1	152	40
921	berlin school of mind and brain, humboldt-universität zu berlin, germany	1	8	4
922	bernard becker medical library, washington university, st. louis, mo, united states	1	61	5
923	bernard lerer, m.d., is director, biological psychiatry laboratory, hadassah-hebrew university medical center, israel	1	60	5
924	bernhard baron memorial research laboratories, institute of obstetrics and gynaecology, queen charlotte's maternity hospital, london, united kingdom	1	8	2
925	bernstein center for computational neuroscience, berlin, germany	1	8	4
926	bernstein focus for neurotechnology and bernstein center for computational neuroscience, göttingen, germany	1	18	10
927	berrywood hospital, duston, northampton, united kingdom	1	3	3
928	bertalanffy center for the study of systems science, vienna, 1040, austria	1	14	4
929	bertek, research triangle park, nc, united states	1	22	6
930	bertis r&d division, bertis inc., seongnam, south korea	1	2	3
931	best practice project management, inc., bethesda, md 20824, po box 30219, united states	1	57	21
932	beth israel deaconess medical center, boston, 02215, ma, united states	1	86	4
933	beth israel deaconess medical center, boston, ma 02215, one deaconess road, united states	1	50	1
934	beth israel deaconess medical center, boston, ma, united states	3	31	14
935	beth israel deaconess medical center, department of surgery, harvard medical school, boston, ma, united states	1	54	2
936	beth israel deaconess medical center, harvard medical school, boston, ma, united states	2	61	53
937	beth israel medical center, albert einstein college of medicine, new york, ny, united states	1	39	1
938	beth israel medical center, department of pain medicine and palliative care, new york, ny 10003, 16th street at first avenue, united states	1	18	0
939	beth israel medical center, department of psychiatry, new york, ny, united states	1	0	1
940	beth israel medical center, new york, ny 10003, first avenue at 16th street, united states	1	39	1
941	beth israel medical center, new york, ny, united states	1	1	0
942	bethesda, md 20814, 5430 grosvenor lane, united states	1	352	3
943	bethesda, md 20817, 9125 aldershot drive, united states	1	7	3
944	bethesda, md, united states	1	69	3
945	bethlem royal and maudsley nhs trust, maudsley hospital, london se5 8az, united kingdom	1	3	0
946	bethlem royal hospital, pharmacy department, beckenham, kent, united kingdom	1	0	0
947	betsi cadwaladr university health board, wrexham academic unit, wrexham, united kingdom	1	203	2
948	beyondblue: the national depression initiative, hawthorn west, vic 3122, po box 6100, australia	1	43	3
949	bgc trust medical college, chittagong, bangladesh	1	1	3
950	bgi education center, university of chinese academy of sciences, shenzhen, 518083, china	2	368	36
951	bgi-shenzhen, shenzhen, 518083, china	2	368	36
952	bhowanipur, kolkata 700025, 17/2/4b chakraberia road south, india	1	12	2
953	big biomedical data research laboratory, department of endodontics, orofacial sensory taste and smell clinic, department of oral medicine sedation and maxillofacial imaging, faculty of dental medicine, hebrew university-hadassah, school of dental medicine, jerusalem, israel	1	1	4
954	bikur holim hospital, jerusalem, israel	1	4	2
955	bilecik seyh edebali university, department of biotechnology, bilecik seyh edebali university, biotechnology application and research center, turkey	1	0	1
956	bilecik seyh edebali university, department of molecular biology, genetics bilecik seyh edebali university, biotechnology application and research center, turkey	1	0	1
957	bilecik şeyh edebali university, biotechnology application and research center, turkey	1	0	2
958	bilecik şeyh edebali university, department of biotechnology, turkey	1	0	2
959	bilecik şeyh edebali university, department of molecular biology and genetics, turkey	1	0	2
960	binghamton university, new york, ny, united states	1	71	4
961	bio-environmental psychiatry research group e05, instituto de investigación sanitaria ibs, granada, spain	1	2	2
962	bio-imaging lab, department of biomedical sciences, university of antwerp, antwerp, belgium	1	86	0
963	bio-x center, key laboratory for the genetics of developmental and neuropsychiatric disorders, shanghai jiao tong university, shanghai 200030, china	1	13	4
964	bio-x center, shanghai jiao tong university, hao ran building, shanghai 200030, 1954 hua shan road, china	1	12	3
965	bio-x center, shanghai jiao tong university, haoran building, shanghai 200030, 1954 huashan road, china	1	62	5
966	bio-x center, shanghai jiao tong university, shanghai, 200030, 1954 huashan road, china	1	14	2
967	bio-x center, shanghai jiao tong university, shanghai, 200030, china	1	22	4
968	bio-x center, shanghai jiao tong university, shanghai, china	4	144	17
969	bio-x institutes, key laboratory for the genetics of development and neuropsychiatric disorders (ministry of educ.), shanghai jiao tong university, shanghai 200030, 1954 huashan road, china	1	7	5
970	bio-x institutes, key laboratory for the genetics of developmental and neuropsychiatric disorders (ministry of education), shanghai jiao tong university, 1954 huashan road, shanghai, 200030, china	1	9	1
971	bio-x institutes, key laboratory for the genetics of developmental and neuropsychiatric disorders (ministry of education), shanghai jiao tong university, shanghai, china	1	6	5
972	bio-x institutes, key laboratory for the genetics of developmental and neuropsychiatric disorders, ministry of education, shanghai jiao tong university, shanghai, 200030, china	1	9	4
973	bio-x life science center, shanghai jiao tong university, shanghai 200030, 1954 huashan road, china	1	13	4
974	bio-x life science research center, shanghai jiao tong university, hao ran building, shanghai 200030, 1954 hua shan road, china	1	5	4
975	bio-x life science research center, shanghai jiao tong university, p.o. box 501, hao ran b., china	1	27	3
976	bio-x life science research center, shanghai jiao tong university, shanghai 200030, china	2	98	5
977	bioaraba health research institute, vitoria, 01009, spain	1	16	4
978	bioassociat, israel	1	14	0
979	biobank, institute born-bunge, university of antwerp, universiteitsplein 1, antwerp, 2610, belgium	1	41	3
980	biobanking and biomolecular resources research infrastructure consortium poland, (bbmri.pl), 7 dębinki street, gdańsk, 80-211, poland	1	8	3
981	biobehavior program, state university of new york at buffalo, new york, ny, united states	1	38	1
982	biobehavioral program, sch. of med. and biomed. sciences, building 5, buffalo, ny 14214-3016, 3435 main st., united states	1	80	1
983	biobehavioral program, sch. of medicine/biomedical sciences, state university of new york, buffalo, ny 14214-3016, hayes c ste. 1, 3435 main st., united states	1	227	1
984	biobehavioral program, state university of new york, buffalo, ny, united states	1	80	1
985	biochemical geneticist, department of medical genetics, university of alberta, 8-39 medical sciences building, 8613 – 144 street, edmonton, t6g 2h7, ab, canada	1	19	10
986	biochemical laboratory, rijngeestgroep, oegstgeeset, netherlands	1	190	3
987	biochemical research center, korea institute of science and technology, seoul 130-650, south korea	1	42	1
988	biochemicals research center, korea institute of science and technology, cheongryang, seoul 130-650, po box 131, south korea	1	16	2
989	biochemistry and molecular genetics department, hospital clinic of barcelona, institut d’investigacions biomèdiques august pi i sunyer (idibaps), barcelona, 08036, spain	1	0	1
990	biochemistry and molecular pharmacology laboratory, institute of biomedical sciences, brazil	1	10	6
991	biochemistry and proteomics group, department of chemistry and biomolecular science, clarkson university, 8 clarkson avenue, potsdam, 13699-5810, ny, united states	1	23	1
992	biochemistry department, centre hospitalier universitaire grenoble-alpes, grenoble, france	1	15	2
993	biochemistry, wayne state university school of medicine, detroit, mi 48201, united states	1	2	2
994	biocruces bizkaia health research institute, barakaldo, bizkaia, spain	3	16	14
995	biocruces bizkaia health research institute, barakaldo, spain	2	43	17
996	biocruces bizkaia health research institute, bizkaia, barakaldo, 48903, spain	2	0	7
997	biocruces bizkaia health research institute, bizkaia, barakaldo, spain	1	8	8
998	biocruces bizkaia health research institute, bizkaia, spain	1	3	2
999	biocruces bizkaia health research institute, spain	1	27	4
1000	biocruces health research institute, barakaldo, bizkaia, e-48903, spain	1	88	11
1001	biocruces health research institute, barakaldo, bizkaia, spain	1	9	31
1002	biocruces health research institute, bizkaia, e-48903 barakaldo, spain	1	63	5
1003	biocruces health research institute, bizkaia, spain	1	51	1
1004	bioelectromagnetics, lawson health research institute, department of medical biophysics, london, ont., n6a 4v2, canada	1	50	1
1005	bioethics programs, department of social and preventive medicine, university of montreal, montreal, qc, canada	1	0	2
1006	biofarma research group, centro de investigación en medicina molecular y enfermedades crónicas (cimus), university of santiago de compostela, santiago de compostela, spain	1	12	2
1007	biofarma research group, centro singular de investigación en medicina molecular y enfermedades crónicas (cimus), universidade de santiago de compostela, avenida de barcelona 22, santiago de compostela, 15782, spain	1	11	0
1008	biofarma research group, depto farmacoloxía, farmacia e tecnoloxía farmacéutica, facultad de farmacia, centro de investigación cimus, universidad de santiago de compostela, santiago de compostela, spain	1	4	4
1009	biofunctional informatics, graduate school of allied health sciences, tokyo medical and dental university, tokyo, japan	1	149	7
1010	bioinformatics and drug design group, department of computational science, national university of singapore, singapore 117543, 3 science drive 2, singapore	1	13	0
1011	bioinformatics and drug design group, department of pharmacy, national university of singapore, 117543 singapore, singapore	1	1	2
1012	bioinformatics and medical informatics team, biomedical research foundation, academy of athens, athens, greece	1	19	6
1013	bioinformatics core facility - biocore, ntnu norwegian university of science and technology, trondheim, norway	1	2	8
1014	bioinformatics division, school of biosciences and technology, vit university, vellore, 632014, tamil nadu, india	1	0	1
1015	bioinformatics research centre, aarhus university, aarhus, denmark	1	925	73
1016	bioinformatics/biostatistics platform ihu-a-icm, brain and spine institute, paris, france	1	7	13
1017	biol. psychiat. psychotic disord. r., dept. psychiat., univ. cincinnati c., cincinnati, oh 45267-0559, united states	1	19	0
1018	biolinerx ltd., jerusalem, 19 hartum street, israel	1	28	3
1019	biological and precision psychiatry, copenhagen research center for mental health, mental health centre copenhagen, copenhagen university hospital, copenhagen, denmark	1	5	2
1020	biological anthropology and comparative anatomy research unit, medical school, the university of adelaide, adelaide, australia	1	24	7
1021	biological anthropology and comparative anatomy research unit, school of biomedical sciences, the university of adelaide, adelaide, sa, australia	1	348	6
1022	biological psychiatry branch, national institute of mental health, bethesda, 20205, md, united states	1	90	2
1023	biological psychiatry branch, national institute of mental health, bethesda, md 20892-1272, united states	1	11	0
1024	biological psychiatry branch, national institute of mental health, bethesda, md, united states	2	135	3
1025	biological psychiatry branch, national institute of mental health, bethesda, united states	1	756	6
1026	biological psychiatry branch, national institute of mental health, building 10, bethesda, md 20892-1272, 10 center drive, united states	1	48	1
1027	biological psychiatry branch, national institute of mental health, msc 1272, bethesda, md 20892-1272, 10 center drive, united states	1	57	1
1028	biological psychiatry branch, national institute of mental health, national institutes of health, bethesda, md, united states	1	48	1
1029	biological psychiatry branch, national institute of mental health, nih clinical center, bethesda, maryland, 20892, building 10, room 3n212, united states	1	102	1
1030	biological psychiatry branch, national institute of mental health, nih, bethesda, md, united states	1	89	1
1031	biological psychiatry branch, national institute of mental health, united states	1	2	1
1032	biological psychiatry branch, natl. inst. of mental health, nih, bldg. 10, bethesda, md 20892, 10 center drive, united states	1	0	0
1033	biological psychiatry branch, nimh, bldg. 10, bethesda, md 20892 1272, 10 center drive msc 1272, united states	1	89	1
1034	biological psychiatry division, medical university innsbruck, a-6020 innsbruck, anichstrasse 35, austria	1	135	14
1035	biological psychiatry group, univ. clin. child adol. psychiat., 45147 essen, virchowstr. 174, germany	1	25	0
1036	biological psychiatry group, university psychiatry clinics, essen, germany	1	8	1
1037	biological psychiatry international joint laboratory of henan, zhengzhou university, zhengzhou, china	1	6	3
1038	biological psychiatry laboratory, department of psychiatry, hadassah - hebrew univ. med. center, ein karem, jerusalem 91120, israel	1	126	0
1039	biological psychiatry laboratory, department of psychiatry, hadassah - hebrew university medical center, ein karem, jerusalem 91120, israel	1	115	10
1040	biological psychiatry laboratory, department of psychiatry, hadassah - hebrew university medical center, jerusalem, israel	1	115	10
1041	biological psychiatry laboratory, department of psychiatry, hadassah - hebrew university medical centre, ein karem, jerusalem 91120, israel	1	98	1
1042	biological psychiatry laboratory, department of psychiatry, hadassah hebrew univ. medical center, jerusalem 91120, pob 24035, israel	1	53	4
1043	biological psychiatry laboratory, department of psychiatry, hadassah-hebrew univ. med. center, jerusalem, israel	1	78	11
1044	biological psychiatry laboratory, department of psychiatry, hadassah-hebrew univ. medical center, jerusalem, israel	1	32	0
1045	biological psychiatry laboratory, department of psychiatry, hadassah-hebrew university medical center, ein karem, jerusalem 91120, israel	1	25	1
1046	biological psychiatry laboratory, department of psychiatry, hadassah-hebrew university medical center, jerusalem 91120, israel	1	88	5
1047	biological psychiatry laboratory, department of psychiatry, hadassah-hebrew university medical center, jerusalem, israel	3	261	10
1048	biological psychiatry laboratory, irccs istituto centro san giovanni di dio fatebenefratelli, via pilastroni, 4, brescia, 25125, italy	1	25	2
1049	biological psychiatry program, department of psychiatry, univ. of cincinnati coll. of med., cincinnati, oh 45267-0559, p.o. box 670559, united states	1	37	0
1050	biological psychiatry program, department of psychiatry, univ. of cincinnati coll. of med., cincinnati, oh, united states	2	79	2
1051	biological psychiatry program, depts. psychiat. pharmacol. cell b., univ. of cincinnati coll. of med., cincinnati, oh, united states	1	53	1
1052	biological psychiatry program, univ. of cincinnati coll. of med., cincinnati, oh 45267, p.o. box 670559, 231 bethesda ave., united states	1	70	1
1053	biological psychiatry program, univ. of cincinnati college of med., cincinnati, oh 45267-0559, p.o. box 670559, united states	1	315	0
1054	biological psychiatry program, university of cincinnati, college of medicine, cincinnati, oh 45267-0559, 231 bethesda ave., united states	1	151	0
1055	biological psychiatry program, university of cincinnati, college of medicine, cincinnati, oh 45267-0559, 231 bethesda avenue, united states	1	9	1
1056	biological psychiatry program, university of cincinnati, college of medicine, cincinnati, oh, united states	1	42	3
1057	biological psychiatry research center, beijing huilongguan hospital, beijing, china	1	6	5
1058	biological psychiatry section, hines va hospital, hines, il, united states	1	12	6
1059	biological psychiatry unit, hadassah-hebrew univ. medical center, 91120 jerusalem, israel	1	52	5
1060	biological psychiatry unit, irccs istituto centro san giovanni di dio fatebenefratelli, brescia, italy	3	104	26
1061	biological psychiatry, atlantic city, united states	1	0	1
1062	biological psychiatry, cincinnati neuroscience program, univ. of cincinnati college of med., cincinnati, oh, united states	1	47	0
1063	biological research center, hungarian academy of sciences, szeged, hungary	1	17	2
1064	biological research department, neuroscience strategic business unit, hoechst-roussel pharmaceuticals inc, somerville, new jersey 08876, route 202-206, p.o. box 2500, united states	1	86	1
1065	biological research institute drs. orlando j. castejón and haydée viloria de castejón, faculty of medicine, zulia university and fundacion castejón, apartado 526, maracaibo, 4002, venezuela	1	0	0
1066	biological sciences platform, sunnybrook research institute, toronto, on, canada	1	1	2
1067	biological sciences research center, department of psychiatry, university of north carolina, chapel hill, nc 27514, united states	1	60	0
1068	biologie du développement, cnrs umr 7622, université p/m curie, paris, france	1	0	3
1069	biology department and volen center, brandeis university, waltham, ma 02454, united states	1	556	0
1070	biology department, neurosciences centre of excellence for drug discovery, glaxosmithkline plc, harlow, essex cm19 5aw, new frontiers science park, third avenue, united kingdom	1	48	2
1071	biology, neurosciences cedd, glaxosmithkline medicines research centre, verona, italy	1	28	3
1072	biomag laboratory, engineering center, helsinki university central hospital, helsinki, finland	1	62	3
1073	biomag laboratory, huslab, helsinki university central hospital, helsinki, finland	1	30	3
1074	biomarker and clinical pharmacology unit, va long beach healthcare system, university of california irvine, long beach, ca 90822, 5901 east seventh street, united states	1	3	5
1075	biomarker group, drug development research laboratories, sumitomo dainippon pharma, co., ltd., 33-94 enoki-cho, suita, osaka, 564-0053, japan	1	3	2
1076	biomarkers unit, center for gender-specific medicine, istituto superiore di sanità, viale regina elena, rome, 299 - 00161, italy	1	0	5
1077	biomed innovation center, wan fang hospital, taipei medical university, taipei, 116, taiwan	1	10	9
1078	biomedical and pharmaceutical research unit, qu health, qatar university, doha, qatar	1	4	2
1079	biomedical centre martin, jessenius faculty of medicine in martin, comenius university in bratislava, martin, 036 01, slovakia	1	0	4
1080	biomedical engineering group, department tscit, ets ingenieros de telecomunicación, university of valladolid, spain	1	20	7
1081	biomedical engineering program, institute for graduate studies and research in engineering, federal university of rio de janeiro (coppe/ufrj), brazil	1	51	18
1082	biomedical ethics unit, faculty of medicine, mcgill university, montreal, que., canada	1	4	0
1083	biomedical imaging research institute (biri), department of biomedical sciences and imaging, cedars-sinai medical center, ca, united states	1	37	5
1084	biomedical research center for mental health (cibersam), madrid, spain	1	108	33
1085	biomedical research center, qatar university, p.o. box 2713, doha, qatar	1	8	8
1086	biomedical research center, university hospital in hradec kralove, sokolska 581, kralove, hradec, 50005, czech republic	1	10	4
1087	biomedical research centre in mental health net (cibersam), santiago apóstol hospital, university of the basque country, vitoria, spain	1	14	3
1088	biomedical research centre, sheffield hallam university, howard st, sheffield, s1 1wb, united kingdom	1	9	2
1089	biomedical research centre, sheffield hallam university, owen buiding, sheffield s1 1wb, howard street, united kingdom	1	38	1
1090	biomedical research centre, sheffield hallam university, sheffield s1 1wb, howard st, united kingdom	1	49	1
1091	biomedical research centre, sheffield hallam university, sheffield s1 1wb, howard street, united kingdom	1	28	0
1092	biomedical research centre, sheffield hallam university, sheffield s1 1wb, united kingdom	1	6	0
1093	biomedical research centre, university hospital hradec kralove, hradec kralove, czech republic	1	32	3
1094	biomedical research centre, university hospital hradec kralove, sokolska 581, hradec kralove, 500 05, czech republic	2	5	10
1095	biomedical research centre, university hospital, sokolska 581, hradec kralove, 500 05, czech republic	1	144	3
1096	biomedical research institute sant pau, iib sant pau, barcelona, spain	1	9	31
1097	biomedical research institute, foundation for research and technology hellas, ioannina 45110, greece	1	897	5
1098	biomedical research institute, sant pau (iib-sant pau), barcelona, spain	1	8	1
1099	biomedical research network on diabetes and related metabolic diseases (ciberdem), instituto de salud carlos iii, madrid, spain	1	4	7
1100	biomedical research networking center for mental health (cibersam), santander, 39011, spain	1	113	1
1101	biomedical sciences research centre, university of st andrews, st andrews, united kingdom	1	1	3
1102	biomedical sciences research complex, eastchem school of chemistry, university of st andrews, st andrews, scotland, ky16 9st, united kingdom	1	19	5
1103	biomedical writing programs, university of the sciences in philadelphia, philadelphia, pa, united states	1	7	1
1104	biometec, university of catania school of medicine, catania, italy	1	13	4
1105	biometrics division, indian agricultural statistics research institute, new delhi 110 012, india	1	24	4
1106	biometrics research program, pittsburgh, 15213, pa, united states	1	9	3
1107	biomolecular science research centre, sheffield hallam university, sheffield, s11wb, united kingdom	1	2	16
1108	biomolecular sciences research centre, sheffield hallam university, howard street, sheffield, s10wb, united kingdom	1	3	1
1109	biomolecular sciences research centre, sheffield hallam university, sheffield, united kingdom	2	47	1
1110	bioniche development, inc., mclean, 22106-6207, va, united states	1	31	0
1111	biophysics institute, csic-upv/ehu, university of the basque country upv/ehu, leioa, 48940, spain	1	22	4
1112	biopsyc biopsychosocial corporation, vienna, austria	1	1	14
1113	biopsychology program, psychology department, university of michigan, united states	1	13	3
1114	biopsychology research group, university clinic for child and adolescent psychiatry, 45147 essen, virchowstr. 174, germany	2	19	4
1115	biosciences institute, newcastle university, newcastle upon tyne, united kingdom	1	2	18
1116	biosciences institute, são paulo state university (unesp), campus of botucatu, brazil	1	10	6
1117	bioss centre for biological signaling studies, university of freiburg, freiburg, germany	1	135	1
1118	biostat solutions, inc., mt. airy, md, united states	1	24	5
1119	biostatiscian, rheumatism foundation hospital, heinola, finland	1	36	4
1120	biostatistics and bioinformatics unit, institute for research in biomedicine (irb barcelona), c/ baldiri reixac 10-12, barcelona, 08028, spain	1	20	3
1121	biostatistics center, massachusetts general hospital, boston, ma, united states	1	155	6
1122	biostatistics collaboration unit, yonsei university college of medicine, seoul, south korea	1	3	4
1123	biostatistics consultation center, the university of iowa college of public health, iowa city, ia 52242, 200 newton road, united states	1	11	3
1124	biostatistics consultation center, university of iowa college of public health, iowa city, ia, united states	1	16	4
1125	biostatistics consulting center, national cheng kung university hospital, college of medicine, national cheng kung university, tainan, taiwan	1	6	7
1126	biostatistics core, department of psychiatry and biobehavioral sciences, david geffen school of medicine, los angeles, united states	1	75	2
1127	biostatistics department, university of washington, seattle, wa, united states	1	6	4
1128	biostatistics group, division of epidemiology and health sciences, manchester university, manchester, united kingdom	1	298	12
1129	biostatistics section, department of preventive and societal medicine, college of medicine, omaha, ne, united states	1	37	1
1130	biostatistics section, university of nebraska medical center, omaha, ne, united states	1	15	2
1131	biostatistics unit, kaiser permanente washington health research institute, seattle, wa, united states	1	6	4
1132	biostatistics, acadia pharmaceuticals, san diego, ca, united states	1	7	4
1133	biostructure and bioimaging institute, national research council, via t. de amicis 95, naples, 80145, italy	1	33	4
1134	biotech research & innovation centre (bric), university of copenhagen, copenhagen, 2200, denmark	1	35	4
1135	biotechmed centre, department of mechanics of materials and structures, university of technology, 11/12 narutowicza street, gdańsk, 80-223, poland	1	8	3
1136	biotechnological and applied clinical sciences department, university of l'aquila, italy	1	123	3
1137	biotechnologie et signalisation cellulaire, umr7242 cnrs, université de strasbourg, illkirch-graffenstaden, france	1	9	0
1138	biotechnology department, college of science, university of baghdad, baghdad, iraq	1	1	0
1139	biotechnology research and application center, cukurova university, adana, 01330, turkey	1	4	5
1140	biotechnology research center, al-nahrain university, baghdad, iraq	1	0	2
1141	biotechnology research center, pharmaceutical technology institute, mashhad university of medical sciences, mashhad, iran	1	81	5
1142	biousian biosystems inc, lexington, ma 02124, 51 follen rd, united states	1	148	1
1143	biovail	1	0	10
1144	biovid corporation, princeton, nj, united states	1	14	3
1145	bioxcel therapeutics, 555 long wharf dr., 12th fl, new haven, 06511, ct, united states	1	8	9
1146	bipolar and depressive disorders unit, hospital clinic, hospital clinic, institute of neurosciences, university of barcelona, idibaps, cibersam, barcelona, catalonia, spain	1	7	6
1147	bipolar and depressive disorders unit, hospìtal clinic de barcelona, c. villarroel, 170, barcelona, 08036, spain	1	2	15
1148	bipolar and depressive disorders unit, institute of neuroscience, hospital clinic, university of barcelona, idibaps, cibersam, 170 villarroel st, 12-0, catalonia, barcelona, 08036, spain	1	5	3
1149	bipolar and depressives disorders unit, hospital clínic, university of barcelona, institut d'investigacions biomèdiques august pi i sunyer (idibaps), mental health research networking center (cibersam), madrid, spain	1	54	11
1150	bipolar and schizophrenia clinics, department of psychiatry/psychology, the cleveland clinic foundation, cleveland, oh 44195, 9500 euclid avenue, united states	1	17	0
1151	bipolar clinic and research program, massachusetts general hospital, boston, ma, united states	1	1	7
1152	bipolar collaborative network, bethesda, md, united states	1	2	1
1153	bipolar disorder program, centro de pesquisas, hospital de clínicas de porto alegre, porto alegre, brazil	1	20	2
1154	bipolar disorder program, university of barcelona hospital clinic, idibaps, barcelona, catalonia, spain	1	523	11
1155	bipolar disorder research program, cambridge health alliance, cambridge, ma, united states	1	12	3
1156	bipolar disorder research program, cambridge hospital, cambridge, ma 02139, 1493 cambridge st., united states	1	77	2
1157	bipolar disorder unit, hospital clinic of barcelona, university of spain, spain	1	9	31
1158	bipolar disorders clinic, black dog institute, sydney, australia	1	62	7
1159	bipolar disorders clinic, centre for addiction and mental health, university of toronto, toronto, ont., canada	1	22	2
1160	bipolar disorders program, clinical institute of neuroscience, university clinic hospital of barcelona, 08036 barcelona, villarroel 170, spain	1	20	2
1161	bipolar disorders program, department of psychiatry, federal university of rio grande do sul, porto alegre, brazil	1	523	11
1162	bipolar disorders program, hospital clinic idibaps, university of barcelona, barcelona, spain	1	0	2
1163	bipolar disorders program, hospital clinic, university of barcelona, 08036 barcelona, villarroel 170, rosselló 140, spain	1	15	0
1164	bipolar disorders program, hospital clinic, university of barcelona, barcelona, spain	1	20	2
1165	bipolar disorders program, hospital clínic, university of barcelona, spain	1	48	0
1166	bipolar disorders programme, hospital clinic, university of barcelona, barcelona, catalonia, spain	1	135	14
1167	bipolar disorders programme, hospital clinic, university of barcelona, idibaps, cibersam, barcelona, catalonia, spain	1	36	0
1168	bipolar disorders programme, institute of neuroscience, hospital clínic barcelona, idibaps, cibersam, university of barcelona, barcelona, catalonia, spain	1	152	40
1169	bipolar disorders research clinic, payne whitney clinic, new york presbyterian hospital, new york, ny, united states	1	9	1
1170	bipolar disorders unit, hospital clinic, university of barcelona, 08036 barcelona (es), c/villaroel 170, spain	1	51	1
1171	bipolar disorders unit, hospital clínic, university of barcelona, barcelona, spain	1	31	28
1172	bipolar disorders unit, institute of neuroscience, hospital clínic, university of barcelona, idibaps, cibersam, barcelona, catalonia, spain	1	6	12
1173	bipolar psychotic disord. prog. l., mclean hospital, belmont, ma, united states	1	94	3
1174	bipolar/psychotic disord. res. prog., department of psychiatry, univ. of cincinnati coll. of med., cincinnati, oh, united states	1	44	4
1175	birla institute of technology and science, pilani, rajasthan, 333031, india	1	5	5
1176	birmingham and solihull mental health foundation trust, heartlands hospital, birmingham, united kingdom	1	87	2
1177	birmingham and solihull mental health nhs foundation trust, united kingdom	1	1	2
1178	birmingham and solihull mental health nhs foundation trust., united kingdom	1	3	3
1179	birmingham children's hospital, parkview clinic, birmingham b13 8qe, 60 queensbridge road, moseley, united kingdom	1	14	0
1180	birmingham early intervention service, birmingham women's and children's nhs foundation trust, united kingdom	1	3	2
1181	birmingham early interventions service, birmingham women's and children's nhs foundation trust, birmingham, united kingdom	1	10	20
1182	bjørknes college, lovisenberggata 13, oslo, 0456, norway	1	41	2
1183	bk21 four community-based intelligent novel drug discovery education unit, college of pharmacy and research institute of pharmaceutical sciences, kyungpook national university, 80 daehak-ro, daegu, 41566, south korea	1	0	1
1184	black dog institute, prince of wales hospital, hospital road, randwick, nsw, australia	1	20	3
1185	black dog institute, prince of wales hospital, randwick, australia	1	239	2
1186	black dog institute, prince of wales hospital, randwick, nsw 2031, australia	2	45	3
1187	black dog institute, prince of wales hospital, randwick, nsw, australia	1	22	1
1188	black dog institute, prince of wales hospital, randwick, sydney, 2031, australia	1	18	1
1189	black dog institute, prince of wales hospital, sydney, nsw, australia	3	117	5
1190	black dog institute, randwick, nsw, australia	1	17	1
1191	black dog institute, sydney, australia	3	28	6
1192	black dog institute, sydney, nsw, australia	2	49	2
1193	black dog institute, university of new south wales, sydney, nsw 2052, australia	1	43	3
1194	black dog institute, university of new south wales, sydney, nsw, australia	1	10	1
1195	blackpool fy3 8np, 7 whinney heys road, united kingdom	1	4	1
1196	blacktown hospital, blacktown, nsw, australia	1	0	1
1197	bldg. 10, nimh, clinical center, bethesda, md 20892-1264, 10 center drive, united states	1	57	1
1198	blizard institute, barts and the london school of medicine and dentistry, queen mary university of london, london, united kingdom	1	113	36
1199	blood bank, hospital g. brotzu, cagliari, italy	1	13	4
1200	blood-brain barrier group, pennington biomedical research center, baton rouge, la 70808, united states	1	54	3
1201	bloomberg school of public health, johns hopkins university, baltimore, 21205, md, united states	1	2	9
1202	blue ridge poison center, division of medical toxicology, department of emergency medicine, charlottesville, va 22908-0774, p.o. box 800744, united states	1	17	1
1203	blue ridge poison center, university of virginia, charlottesville, va, united states	1	18	8
1204	bnai zion medical center, haifa 31048, 47 golomb st., israel	1	31	2
1205	boardman, oh 44512, 721 boardman-poland road, united states	1	7	2
1206	boehringer ingelheim pharma kg, 88397 biberach an der riss, birkendorfer strasse 65, germany	1	120	3
1207	boehringer ingelheim pharma kg, biberach an der riss, germany	1	120	3
1208	boehringer ingelheim pharma, gmbh and co. kg, d-88397 biberach, germany	1	438	0
1209	boehringer ingelheim pharmaceuticals, burlington, ont., canada	1	120	3
1210	boehringer ingelheim pharmaceuticals, ridgfield, ct, united states	1	120	3
1211	boehringer ingelheim, research and development, laval, qc h7s 2g5, 2100 rue cunard, canada	1	0	0
1212	boehringer ingelheim, ridgefield, ct, united states	1	22	6
1213	bolivian society of psychiatry, bolivia	1	242	81
1214	bollinger professor of alzheimer's disease (ad), louisiana state university health sciences center, new orleans, la, united states	1	17	7
1215	bolsista de produtividade cnpq nível 1d, brazil	1	54	2
1216	bolton salford and trafford mental health nhs trust, university of manchester, manchester, united kingdom	1	0	0
1217	bolton, salford and trafford mental health nhs trust, salford, manchester m30 ogt, cromwell house, united kingdom	1	162	1
1218	bombay hosp. and med. res. center, churchgate mumbai (bombay), 400 020, 302, charleville societey, a road, india	1	5	1
1219	bordeaux international neuroscience master, university of bordeaux, bordeaux, france	1	24	13
1220	bordeaux university, usr cnrs 3413 sanpsy, research unit, bordeaux, 33000, france	1	28	4
1221	born naturopathic assoc., inc., united states	1	0	0
1222	boston children's hospital/harvard medical school, department of psychiatry, 300 longwood avenue, boston, 02115, ma, united states	1	10	0
1223	boston children’s hospital, harvard medical school, 300 longwood avenue, boston, ma, united states	1	30	5
1224	boston collaborative drug surveillance program, boston university, lexington ma, united states	1	19	3
1225	boston collaborative drug surveillance program, boston university, school of public health, lexington, ma, united states	1	49	4
1226	boston college, chestnut hill, ma, united states	2	347	1
1227	boston consulting group, 8001 zürich zh, münstergasse 2, switzerland	1	48	1
1228	boston consulting group, boston, ma 02109, exchange place, united states	1	48	1
1229	boston pilgrim hospital, united lincolnshire healthcare nhs trust, sibsey road, boston, lincolnshire, pe21 9qs, united kingdom	1	2	8
1230	boston psychoanal. soc. and inst., boston, ma, united states	1	0	4
1231	boston university school of medicine, boston, ma 02118, united states	1	19	4
1232	boston university school of medicine, boston, ma, united states	2	38	5
1233	boston university school of medicine, section of general internal medicine, boston va medical center, boston, ma, united states	1	21	4
1234	boston university school of public health, boston, massachusetts, united states	1	5	6
1235	boston university, boston, ma, united states	1	6	0
1236	boston university, ma, united states	1	2	0
1237	boston university, united states	1	97	0
1238	bowles center for alcohol studies, university of north carolina, chapel hill, nc 27599, united states	1	83	5
1239	box 080, mrc sgdp centre, institute of psychiatry, camberwell, london se5 8af, de crespigny park, united kingdom	1	71	1
1240	box 1230, department of psychiatry, mount sinai school of medicine, new york, ny 10029-6574, united states	1	11	1
1241	box 3270, duke university medical center, durham, nc 27710, united states	1	643	2
1242	box 42, new york, ny 10032, 1051 riverside drive, united states	1	56	0
1243	box 58, shanghai institute of physiology, chinese academy of sciences, shanghai, 20003i, 320 yueyang road, china	1	55	5
1244	box p050, department of psychological medicine, institute of psychiatry, london, se5 8af, de crespigny park, united kingdom	1	15	2
1245	braceland ctr. mental health/aging, institute of living, hartford hosp. mental health network, hartford, ct 06106, 400 washington street, united states	1	2	0
1246	bradford school of pharmacy, university of bradford, bradford, west yorkshire bd7 1dp, united kingdom	3	259	2
1247	brain aging and mental health, department of psychiatry, new york state psychiatric institute, columbia university irving medical center, united states	1	1	0
1248	brain and behaviour institute, department of psychiatry and neuropsychology, universiteit maastricht, netherlands	2	112	2
1249	brain and behaviour institute, maastricht university, department of psychiatry, 6202 az maastricht, po box 5800, netherlands	1	6	1
1250	brain and behaviour research center, university of haifa, haifa 31905, israel	1	198	16
1251	brain and cognition clinic, institute for cognitive sciences studies, tehran, iran	1	0	4
1252	brain and cognition discovery foundation toronto, toronto, m4w 3w4, on, canada	1	3	4
1253	brain and cognition discovery foundation, toronto, canada	1	273	26
1254	brain and cognition discovery foundation, toronto, m4w 3w4, on, canada	1	0	4
1255	brain and cognition research institute, wuhan university of science and technology, china	1	64	2
1256	brain and cognitive science-wcu program, seoul national university college of natural sciences, seoul, south korea	1	13	8
1257	brain and cognitive science-wcu program, seoul national university, college of natural sciences, shilim-dong, gwanak-gu, seoul 151-746, south korea	1	8	6
1258	brain and consciousness research center, taipei medical university - shuang ho hospital, new taipei city, taiwan	1	90	5
1259	brain and mental health lab, school of psychological sciences and monash institute of cognitive and clinical neurosciences, monash university, melbourne, vic, australia	1	92	2
1260	brain and mind centre, central clinical school, sydney medical school, university of sydney, camperdown, australia	1	15	2
1261	brain and mind centre, the university of sydney, australia	1	1	14
1262	brain and mind research institute, camperdown nsw 2050, 100 mallett street, australia	1	4	32
1263	brain and mind research institute, sydney, nsw, australia	2	135	12
1264	brain and mind research institute, university of sydney, camperdown, nsw 2050, australia	1	69	0
1265	brain and mind research institute, university of sydney, sydney, nsw 2050, 94 mallett street, camperdown, australia	1	2	1
1266	brain behavior laboratory, neurodevelopment and psychosis section, department of psychiatry, philadelphia, pennsylvania, united states	1	4	6
1267	brain behavior laboratory, rappaport faculty of medicine, technion institute of technology, hadera, israel	1	3	0
1268	brain behavior laboratory, sha'ar menashe mental health center, hadera, israel	1	22	3
1269	brain behavior laboratory, sha'ar menashe mental health center, technion institute of technology, haifa, israel	1	4	0
1270	brain center rudolf magnus, university medical center utrecht, utrecht, netherlands	1	5	5
1271	brain convergence research center, korea university anam hospital, seoul, south korea	1	2	3
1272	brain degeneration and therapeutics group, brain and neuroscience communities of research, universiti teknologi mara (uitm), shah alam, 40450, malaysia	1	92	2
1273	brain disorders program, austin health, heidelberg west, vic., australia	1	2	2
1274	brain health imaging centre, camh, toronto, on, canada	1	0	11
1275	brain health nexus, cohen veterans network, boston, ma, united states	1	5	12
1276	brain imaging and analysis center, duke university medical center, united states	1	120	3
1277	brain imaging center and sprague pet laboratory, department of psychiatry and human behavior, univesity of california irvine, irvine, ca 90822, 5901 east seventh street, united states	1	3	5
1278	brain imaging center west (bicw), research center juelich, juelich 52425, germany	1	81	4
1279	brain imaging center west, institute of medicine, research center jülich, jülich, germany	1	40	4
1280	brain imaging project, national institute of radiological sciences, chiba, japan	1	149	7
1281	brain imaging project, national institute of radiological sciences, inage-ku, chiba-shi, chiba 263-8555, 9-1-4-chome, anagawa, japan	1	23	2
1282	brain imaging project, natl. inst. of radiological sciences, chiba, japan	1	103	3
1283	brain imaging project, natl. inst. of radiological sciences, inage-ku, chiba 263-8555, 4-9-1 anagawa, japan	1	103	3
1284	brain injury programs, healthsouth braintree rehabilitation hospital, braintree, ma, united states	1	370	17
1285	brain injury rehabilitation unit, healthone spalding rehabilitation hospital, aurora, co 80011, united states	1	7	0
1286	brain injury research center, department of rehabilitation and human performance, department of neurology, icahn school of medicine at mount sinai, new york, ny, united states	1	1	2
1287	brain institute, federal university of rio grande do norte, natal, brazil	1	24	2
1288	brain mapping and sensory motor integration, institute of psychiatry of federal university of rio de janeiro (ipub/ufrj), brazil	1	51	18
1289	brain mapping unit, behavioural and clinical neurosciences institute, university of cambridge, cambridge, united kingdom	1	88	2
1290	brain mapping unit, department of psychiatry, university of cambridge, cambridge, cb2 3eb, downing site, downing st, united kingdom	1	4	32
1291	brain mapping unit, department of psychiatry, university of cambridge, cambridge, united kingdom	2	44	10
1292	brain mapping unit, department of psychiatry, university of cambridge, united kingdom	1	89	3
1293	brain physiology and metabolism section, national institute on aging, national institutes of health, bethesda, md, united states	1	86	0
1294	brain plasticity group, center for neuroscience, swammerdam institute for life sciences, university of amsterdam, 1098, xh, netherlands	1	18	2
1295	brain plasticity institute at posit science corporation, san francisco, ca, united states	1	76	1
1296	brain research center (aübaum), ankara university, ankara, turkey	1	3	4
1297	brain research centre, department of psychiatry, university of british columbia, vancouver, bc, canada	1	64	1
1298	brain research institute, david geffen school of medicine at ucla, los angeles, ca 90095, united states	1	122	4
1299	brain research institute, department of neuropharmacology, university of bremen, bremen, germany	1	30	1
1300	brain research institute, dept. of neuropharmacology, university of bremen, hochschulring 18, bremen, 28359, germany	1	18	1
1301	brain research institute, ucla center for the health sciences, los angeles, ca 90095-1763, united states	1	43	1
1302	brain research institute, university of zurich, 8057 zurich, switzerland	1	47	4
1303	brain research institute, university of zürich and ethz, 8057 zürich, switzerland	1	887	23
1304	brain research institute, yonsei university college of medicine, seoul, south korea	1	0	2
1305	brain research laboratory, faculty of pharmacy, campus puncak alam, universiti teknologi mara (uitm), bandar puncak alam, 42300, malaysia	1	92	2
1306	brain research new zealand rangahau roro aotearoa centre of research excellence, christchurch, new zealand	1	9	5
1307	brain science institute, korea institute of science and technology (kist), seoul, south korea	1	1	3
1308	brain sciences institute, faculty of life and social sciences, swinburne university of technology, melbourne, vic 3122, john street hawthorn, australia	1	36	5
1309	brain sciences institute, faculty of life and social sciences, swinburne university of technology, melbourne, vic, australia	1	39	6
1310	brain sciences institute, swinburne university of technology, hawthorn, vic, australia	1	8	5
1311	brain sciences institute, swinburne university of technology, hawthorn, vic., australia	1	52	4
1312	brain sciences institute, swinburne university of technology, melbourne, vic., australia	1	59	5
1313	brain sciences, imperial college london, london, united kingdom	1	6	5
1314	brain stimulation unit, beer yaácov mental health center, 70350 tel aviv, po box 1, israel	1	4	0
1315	brain stimulation unit, national institute of neurological disorders and stroke, 10 center drive msc 1428, bethesda, md 20892-1428, united states	1	537	1
1316	brain systems research laboratory, mental health research institute, parkville, vic, australia	1	5	4
1317	brain systems research laboratory, the mental health research institute, melbourne, 3052, australia	1	115	3
1318	brain tissue resource center, mclean hospital, belmont, ma, united states	1	53	3
1319	brain tumor center, hallym university sacred heart hospital, anyang, south korea	1	2	18
1320	brain-mind project inc., galveston, tx, united states	1	0	7
1321	brains on-line llc, south san francisco, ca, united states	1	67	1
1322	brains on-line, groningen, netherlands	1	27	1
1323	brains unit, department of experimental medical science, lund university, lund, 22184, sweden	1	6	5
1324	brains-on-line, groningen, netherlands	1	24	4
1325	brainstorms, neuroscience education institute, carlsbad, ca 92009, 5857 owens street, united states	1	13	0
1326	brainstorms, san diego, ca 92122, 8899 university center lane, united states	2	20	2
1327	branch in sandomierz, jan kochanowski university of kielce, sandomierz, poland	1	10	18
1328	brandeis university, department of biology, m/s 008, waltham, ma 02454, 415 south street, united states	1	181	3
1329	brandon mental health unit, leicester, united kingdom	1	2	0
1330	brazilian association of psychiatry, brazil	1	242	81
1331	brazilian research council (cnpq), brazil	1	33	7
1332	brf foundation lucca, italy	1	5	2
1333	bridge plaza treatment and rehabilitation services, united states	1	21	2
1334	brigham and women's hospital, boston, massachusetts, united states	1	5	6
1335	brighton & sussex medical school, school of psychology, university of sussex, falmer, brighton, united kingdom	1	46	4
1336	brighton and sussex medical school, university of sussex, brighton bn1 9qj, united kingdom	1	52	2
1337	brighton and sussex medical school, university of sussex, brighton, united kingdom	1	925	73
1338	brightside health inc, oakland, ca, united states	1	2	1
1339	bristol medical school	1	6	5
1340	bristol medical school, population health sciences, university of bristol, bristol, united kingdom	1	10	6
1341	bristol myers squibb company, department of neuroscience biology, pharmaceutical research institute, wallingford, ct, united states	1	7	6
1342	bristol myers squibb, 6-5-1 nishi-shinjuku, tokyo, shinjuku-ku, 163-1328, japan	1	5	5
1343	bristol, adviser to the british national formulary, united kingdom	1	0	1
1344	bristol-myers squibb brazil, são paulo, brazil	1	33	7
1345	bristol-myers squibb company, braine l'alleud, belgium, united states	1	90	6
1346	bristol-myers squibb company, wallingford, ct, united states	1	90	6
1347	bristol-myers squibb pharmaceutical research institute, 5 research parkway, wallingford, 06492-7660, ct, united states	2	11	0
1348	bristol-myers squibb pharmaceutical research institute, wallingford, ct 06492, 5 research parkway, united states	1	6	0
1349	bristol-myers squibb research and development, 5 research parkway, wallingford, 06492-7660, ct, united states	2	15	0
1350	bristol-myers squibb research and development, princeton, nj 08543, po box 5400, united states	1	46	0
1351	bristol-myers squibb, eli lilly, merck, united kingdom	1	3	3
1352	bristol-myers squibb, eli lilly, pfizer, united kingdom	1	0	2
1353	bristol-myers squibb, lawrenceville, nj, united states	1	462	4
1354	bristol-myers squibb, medizin neuroscience, germany	1	66	2
1355	bristol-myers squibb, princeton, nj, united states	1	681	8
1356	bristol-myers squibb, united kingdom	1	0	10
1357	bristol-myers squibb, wallingford, ct, united states	3	840	13
1358	brit. assoc. for psychopharmacology	1	1	4
1359	brit. columbia drug poison info. c., vancouver, bc v6z 1y6, 1081 burrard st., canada	1	58	3
1360	brit. columbia reg. adverse drug r., brit. columbia drug poison info. c., vancouver, bc, canada	1	58	3
1361	british columbia mental health & substance use services research institute, canada	1	1	2
1362	british columbia mental health and substance use services research institute, vancouver, canada	1	8	15
1363	british columbia mental health and substance use services, vancouver, bc, canada	1	19	2
1364	british columbia psychosis program, bc mental health and addictions research institute, vancouver, bc, canada	1	5	3
1365	british heart foundation cardiovascular epidemiology unit, department of public health and primary care, university of cambridge, cambridge, united kingdom	1	6	20
1366	britton chance center for biomedical photonics, wuhan national laboratory for optoelectronics, huazhong university of science and technology, wuhan, 430074, china	1	11	3
1367	bro taf health authority, univ. of wales college of medicine, cardiff, united kingdom	1	83	1
1368	broad institute of mit and harvard, cambridge, ma 02142, united states	1	196	0
1369	broad institute of mit and harvard, cambridge, ma, united states	1	208	2
1370	broad institute of the massachusetts institute of technology, harvard university, cambridge, ma, united states	1	12	0
1371	broadmeadows health service, melbourne, vic., australia	1	25	2
1372	broadmind science ltd, 47 bow field, hook, rg27 9sa, hants, united kingdom	1	400	2
1373	broadmoor hospital, crowthorne, berkshire, united kingdom	1	4	0
1374	brockville mental health centre (bmhc), 1804 highway 2 east, po box 1050, brockville, k6v 5w7, ontario, canada	1	2	1
1375	brody school of medicine, east carolina university, greenville, nc, united states	1	6	15
1376	brométrica, barcelona, spain	1	188	3
1377	bronllys hospital, brecon wales ld3 olu, united kingdom	1	14	1
1378	bronx psychiatric center, bronx, ny 10461-2796, waters place, united states	1	20	6
1379	bronx va, ny, united states	1	78	5
1380	bronx veterans administration hospital, department of psychiatry, mount sinai school of medicine, united states	1	51	3
1381	bronx veterans affairs medical center, bronx, ny 10468, 130 west kingsbridge road, united states	1	50	2
1382	brookdale department of geriatrics and palliative medicine, icahn school of medicine at mount sinai, 1468 madison avenue, annenberg, 10th floor, new york, 10029, ny, united states	1	3	2
1383	brooke army medical center, italy	1	32	8
1384	brooklands hospital, brian oliver centre, birmingham b37 7hl, brooklands, coleshill road, united kingdom	1	18	1
1385	brookline, ma 02445, 1 brookline place, united states	1	20	4
1386	brookline, ma 02446-2804, 50 centre street, united states	1	17	0
1387	brooklyn, ny 11229, 2416 quentin road, united states	1	0	0
1388	brookside family consultation centre, cambridge, united states	1	298	12
1389	brou, france	1	11	3
1390	broward general medical center, nova southeastern university's college of pharmacy, fort lauderdale, fl, united states	1	5	1
1391	brown university medical school, providence, ri 02908-4735, 825 chakstone avenue, united states	1	1	0
1392	brown university, butler hospital, providence, ri 02912, 345 blackstone blvd., united states	1	91	0
1393	brown university, department of psychiatry and human behavior, butler hospital, providence, ri 02906, 345 blackstone boulevard, united states	1	66	1
1394	brown university, providence, ri, united states	1	4	3
1395	brown university, rhode island hospital, potter 3, 593 eddy street, providence, 02903, ri, united states	1	16	2
1396	brown university, school of medicine, corrigan mental health center, fall river, ma 02720, 49 hillside street, united states	1	48	1
1397	bruce and ruth rappaport faculty of medicine, technion - israel institute of technology haifa, 30550 binyamina, pob 43, israel	1	8	0
1398	bruce h. phelps, ph.d., are in the adult psychiatry branch, division of special mental health research, intramural research program, national institute of mental health, saint elizabeths hospital, washington, dc, usa 2002.	1	31	8
1399	bruce rappaport faculty of medicine, technion institute of technology, haifa, israel	2	65	5
1400	bruce rappaport faculty of medicine, technion-haifa, israel	1	16	2
1401	bruce wcarter va medical center, miami, fl, united states	1	8	1
1402	brudnick neuropsychiat. res. inst., univ. of massachusetts med. school, worcester, ma, united states	1	28	2
1403	brudnick neuropsychiatric research institute, department of psychiatry, university of massachusetts medical school, worcester, ma, united states	1	93	0
1404	bruno müller-oerlinghausen, m.d., is professor, laboratory of clinical psychophysiology (chief), department of psychiatry, freie universität berlin, germany	1	43	2
1405	buffalo psychiatric center, buffalo, ny, united states	2	0	1
1406	buffalo, ny 14215, 462 grider street, united states	1	2	4
1407	bulletin of clinical psychopharmacology, department of epidemiology, gata medical school, ankara, turkey	1	3	2
1408	bulletin of clinical psychopharmacology, gata haydarpasa training hospital, department of psychiatry, istanbul, turkey	1	3	2
1409	buraidah mental health hospital, po box 2292, saudi arabia	1	4	2
1410	buraidah mental health hospital, saudi arabia	1	4	2
1411	burden neurological hospital, bristol bs12 obz, united kingdom	1	8	0
1412	bureau of children and families, office of mental health, new york, ny, united states	1	25	3
1413	burke rehabilitation hospital, white plains, ny, united states	1	23	2
1414	business intelligence unit, austin hospital, melbourne, vic, australia	1	8	7
1415	business school, imperial college, london sw7 2az, united kingdom	1	30	1
1416	butler hospital and department of psychiatry and human behavior, alpert medical school, brown university, providence, ri 02906, united states	1	40	0
1417	butler hospital, 345 blackstone blvd, providence, 02906, ri, united states	1	11	1
1418	butler hospital, 700 butler drive, providence, 02906, ri, united states	1	2	6
1419	butler hospital, brown medical school, providence, ri, united states	1	581	13
1420	butler hospital, brown university, ri, united states	1	71	4
1421	butler hospital, department of neurology, warren alpert medical school of brown university, 345 blackstone blvd, providence, 02906, ri, united states	1	14	0
1422	butler hospital, department of psychiatry and human behavior brown university school of medicine, providence, ri 02906, 345 blackstone blvd, united states	1	33	0
1423	butler hospital, department of psychiatry and human behavior, brown university school of medicine, providence, ri 02906, 345 blackstone blvd., united states	1	7	0
1424	butler hospital, department of psychiatry and human behavior, warren alpert medical school at brown university, providence, ri, united states	1	58	1
1425	butler hospital, dept. of psychiat. and hum. behavior, brown medical school, providence, ri 02906, 345 blackstone boulevard, united states	1	128	0
1426	butler hospital, providence, ri 02906, 345 blackstone blvd., united states	2	129	1
1427	butler hospital, providence, ri 02906, 345 blackstone boulevard, united states	3	290	3
1428	butler hospital, providence, ri, united states	2	134	8
1429	butler hospital, providence, united states	1	62	7
1430	butler university, indianapolis, in, united states	1	10	5
1431	c. and o. vogt institute for brain research, university of duesseldorf, duesseldorf 40225, germany	1	81	4
1432	c. and o. vogt institute for brain research, university of duesseldorf, duesseldorf, germany	1	18	4
1433	c. b. patel res. ctr. for c./b. s., bhaidas hall building, mumbai 400 056, vile parle (west), india	1	34	2
1434	c. david wise, ph.d., are in the adult psychiatry branch, division of special mental health research, intramural research program, national institute of mental health, saint elizabeths hospital, washington, dc, usa 2002.	1	31	8
1435	c. o. vogt institute for brain research, university of duesseldorf, duesseldorf, germany	1	40	4
1436	c.a.r., cambridge, united kingdom	1	26	4
1437	c.e. schmidt college of medicine, florida atlantic university (fau), boca raton, fl 33431, 777 glades road, united states	1	85	2
1438	c.e.n.t.e.r. division of gastroenterology and hepatology mayo clinic, rochester, mn, united states	1	113	36
1439	c.n.r. institute of neuroscience, pisa-cagliari, italy	1	61	2
1440	c/-curtis brown australia, paddington, nsw 2021, po box 19, australia	1	0	0
1441	c/o centre for evaluation of medicines, hamilton, ont. l8n 1g6, 105 main street east, canada	1	47	3
1442	c/o jmo management, royal prince alfred hospital, sydney, nsw 2050, camperdown, australia	1	4	0
1443	c/o sunnybrook health sciences centre, department of psychiatry, toronto, on m4n 3m5, 2075 bayview ave, canada	1	33	3
1444	c3nl, division of brain sciences, department of medicine, imperial college london, london, united kingdom	1	605	5
1445	c9-420, ucla dept. psychiat. b., los angeles, ca 90024-1759, 760 westwood plaza, united states	1	412	1
1446	cade clinic, department of academic psychiatry, royal north shore hospital, nsw, australia	1	55	6
1447	cade clinic, department of psychiatry, royal north shore hospital, australia	1	89	9
1448	cade clinic, department of psychiatry, royal north shore hospital, st leonards, 2065, australia	1	361	5
1449	cade clinic, department of psychiatry, royal north shore hospital, st leonards, 2065, nsw, australia	1	589	13
1450	cade clinic, department of psychiatry, royal north shore hospital, sydney, nsw, australia	1	114	9
1451	cade clinic, level 5, building 36, royal north shore hospital, st leonards, sydney, nsw 2065, australia	2	203	18
1452	cade clinic, royal north shore hospital, northern sydney local health district, nsw, australia	1	4	9
1453	cade clinic, royal north shore hospital, northern sydney local health district, st leonards, nsw, australia	1	0	3
1454	cade clinic, royal north shore hospital, sydney, nsw, australia	1	51	9
1455	cade clinic, sydney medical school - northern, university of sydney, sydney, nsw, australia	1	589	13
1456	calder unit, south west yorkshire mental health nhs trust, wakefield wf1 3sp, ouchthorpe lane, united kingdom	1	31	2
1457	california clinical trials, los angeles, ca, united states	1	130	4
1458	california department of state hospitals (dsh), bateson building, 1600 9th street, room 400, sacramento, 95814, ca, united states	1	31	3
1459	california department of state hospitals (dsh), psychopharmacology resource network, dsh-patton, 3102 east highland avenue, patton, 92369, ca, united states	1	31	3
1460	california department of state hospitals, sacramento, ca, united states	1	6	15
1461	california institute of technology - caltech, united states	1	0	0
1462	california institute of technology, division of biology, pasadena ca 91125, 156-29, united states	1	46	0
1463	california neuroscience research medical group, inc., sherman oaks, ca, united states	1	27	2
1464	california northstate university, college of pharmacy, rancho cordova, ca, united states	1	45	1
1465	california state university, long beach, ca, united states	1	15	6
1466	california state university, san marcos, san marcos, ca 92069, 333 south twin oaks valley road, united states	1	10	2
1467	callwood cardiology care, burlington, nc, canada	1	427	7
1468	calvary wakefield and rehabilitation private hospitals, adelaide, australia	1	4	2
1469	camarillo state hospital and developmental center, camarillo, ca, united states	1	18	1
1470	camarillo—ucla clinical research unit, camarillo, ca, 93011, united states	1	22	3
1471	camarillo—ucla clinical research unit, camarillo, ca, united states	1	22	3
1472	cambridge & peterborough nhs foundation trust, cambridge, united kingdom	1	91	31
1473	cambridge and peterborough partnership nhs foundation trust, cambridge, united kingdom	1	23	5
1474	cambridge cognition, cambridge, united kingdom	1	32	3
1475	cambridge health alliance, harvard medical school	1	93	10
1476	cambridge health alliance, harvard medical school, cambridge, 02139, ma, united states	1	16	17
1477	cambridge health alliance, harvard medical school, cambridge, ma, united states	1	1	3
1478	cambridge health alliance-harvard medical school, 103 garland street, everett, 02149, ma, united states	1	7	0
1479	cambridge hospital, 1493 cambridge st., macht building, 02139, cambridge, ma, united states	1	80	2
1480	cambridge hospital, cambridge, ma 02139, 1493 cambridge st., united states	1	12	3
1481	cambridge hospital, cambridge, ma, united states	1	0	4
1482	cambridge hospital, department of psychiatry, cambridge, ma 02139, 1493 cambridge st., united states	1	49	0
1483	cambridge psychosis centre, cambridgeshire and peterborough nhs foundation trust, cambridge, united kingdom	1	8	15
1484	cambridge university, cambridge, united kingdom	1	18	6
1485	cambridge university, department of experimental psychology, cambridge, cb2 3eb, downing street, united kingdom	1	409	1
1486	cambridge university, department of psychiatry, united kingdom	1	2	2
1487	cambridge university, dept. of experimental psychology, cambridge, cb2 3eb, downing street, united kingdom	1	108	1
1488	cambridge, ma 02139, 19 rockingham street, united states	1	57	0
1489	cambridge, ma 02139, 77 massachusetts ave. e51-290, united states	1	38	4
1490	cambridge, ma, united states	1	24	0
1491	cambridgeshire and peterborough nhs foundation trust, cambridge, united kingdom	1	5	7
1492	cambridgeshire and peterborough nhs foundation trust, cambridgeshire, united kingdom	1	2	18
1493	cambridgeshire and peterborough nhs foundation trust, park house huntingdon, cambridgeshire, united kingdom	1	1	2
1494	cambridgeshire primary care trust, fulbourn, cambridge, united kingdom	1	298	12
1495	camden and islington nhs foundation trust, united kingdom	1	25	1
1496	camden county health center, mental health care, blackwood, nj, united states	1	82	3
1497	cameo early intervention service, cambridgeshire and peterborough national health service foundation trust, cambridge, united kingdom	1	108	33
1498	cameo, cambridgeshire and peterborough foundation nhs trust, cambridge, united kingdom	1	32	3
1499	camh, toronto, canada	1	19	6
1500	camlet lodge regional secure unit, chase farm hospital, enfield en2 8jl, united kingdom	1	36	2
1501	campbell clinic, lethbridge, alta. t1j 3ml, 430 mayor magrath drive, canada	1	19	1
1502	campbell family mental health institute, centre for addiction and mental health, toronto, m5t 1r8, canada	1	4	5
1503	campbell family mental health research institute of camh, toronto, on, canada	1	0	11
1504	campbell family mental health research institute, camh, toronto, canada	1	93	39
1505	campbell family mental health research institute, center for addiction and mental health, 250 college street, toronto, m5t 1r8, on, canada	1	57	2
1506	campbell family mental health research institute, centre for addiction and mental health, toronto, canada	1	10	8
1507	campbell family mental health research institute, centre for addiction and mental health, toronto, on, canada	2	31	15
1508	campbell family mental health research institute, toronto, on, canada	1	67	11
1509	campbell institute research program, centre for addiction and mental health, toronto, on, canada	1	0	6
1510	campbell research institute, centre for addiction and mental health, university of toronto, toronto, on, canada	2	149	16
1511	campus box 8225, st. louis, mo 63110, 4525 scott avenue, united states	1	10	0
1512	campus virchow-klinikum, charité-universitätsmedizin berlin, and department of child and adolescent psychiatry, berlin institute of health, berlin, germany	1	116	4
1513	canada	14	184	0
1514	canada excellence research chair in microbiome-endocannabinoidome axis in metabolic health (cerc-mend), université laval, quebec, g1v 4g5, qc, canada	1	11	3
1515	canada institute for clinical evaluative sciences (ices), toronto, on, canada	1	93	39
1516	canada university health network, mood disorders psychopharmacology unit, toronto, on m5t 2s8, 399 bathurst street, canada	1	0	3
1517	canadian coalition for seniors' mental health, toronto, ont., canada	1	27	13
1518	canadian college of naturopathic medicine, toronto, on m2k 1e2, 1255 sheppard avenue east, canada	1	2	0
1519	canadian college of naturopathic medicine, toronto, ont., canada	1	7	5
1520	canadian rapid treatment center of excellence, mississauga, on, canada	1	273	26
1521	canberra clinical school, university of sydney, canberra, act, australia	1	33	3
1522	canberra hospital, canberra, act, australia	1	7	1
1523	canberra hospital, woden valley, canberra, australia	1	15	10
1524	cancer center palliative care team, hokkaido university hospital, sapporo, japan	1	3	3
1525	cancer counseling and support center, hospital, university of yamanashi, kofu, japan	1	10	3
1526	cancer epidemiology unit, national center of epidemiology, instituto de salud carlos iii, madrid, spain	1	18	16
1527	cancer prevention and control research program, yale cancer center, new haven, ct, united states	1	47	5
1528	cancer research institute, university of california, san francisco, ca, united states	1	108	9
1529	candidate of master of epidemics, national taiwan university, taiwan	1	1	8
1530	canela 10110-150, salvador, ba, avenida araujo pinho, 124/2002, brazil	1	50	2
1531	canterbury suicide project, christchurch sch. med. hlth. sci., christchurch, new zealand	1	25	2
1532	canterbury suicide project, christchurch school of medicine and health sciences, christchurch, po box 4345, new zealand	1	55	5
1533	canterbury suicide project, christchurch school of medicine, christchurch 8001, po box 4345, new zealand	1	25	2
1534	canterbury suicide project, christchurch, new zealand	1	25	2
1535	canyon springs hospital, palm springs, calif., united states	1	43	4
1536	caphri, school for public health and primary care, maastricht university, maastricht, netherlands	1	17	12
1537	capital district psychiatric center, albany, ny, united states	1	46	2
1538	capital district psychiatric center, united states	1	3	6
1539	cardiac electrophysiology unit, department of physiology, faculty of medicine, chiang mai university, chiang mai, 50200, thailand	1	16	4
1540	cardiac rehabilitation research center, isfahan cardiovascular research institute, isfahan university of medical sciences, isfahan, iran	1	6	4
1541	cardiff and vale nhs trust, cardiff, wales, united kingdom	1	24	5
1542	cardiff and vale university health board, welsh neuropsychiatry service, cardiff, united kingdom	1	281	14
1543	cardiff institute of society health and ethics, cardiff university, cardiff, united kingdom	1	3	5
1544	cardiff school of biosciences, cardiff cf10 3us, biomedical building, museum avenue, united kingdom	1	2	1
1545	cardiff university brain research imaging centre, school of psychology, cardiff university, cardiff, united kingdom	1	165	5
1546	cardiff university, hergest unit, ll57 2pw, united kingdom	1	7	0
1547	cardiff university, united kingdom	2	29	5
1548	cardio-thoracic-vascular department, hospital “g. mazzini”, asl 4, teramo, italy	1	17	3
1549	cardiology department, hadassah hebrew university medical center, jerusalem, israel	1	1	1
1550	cardiology department, hammersmith hospital, imperial college healthcare nhs trust, united kingdom	1	16	5
1551	cardiology department, king's college hospital and king's college london, united kingdom	1	16	5
1552	cardiovascular department, providence veterans affairs medical center, providence, ri, united states	1	5	3
1553	cardiovascular division, department of internal medicine, chang gung memorial hospital, linkou medical center, college of medicine, chang gung university, taoyuan, taiwan	1	4	2
1554	cardiovascular medicine, northwestern memorial hospital, chicago, il, united states	1	11	3
1555	cardiovascular pharmacology, kalamazoo, mi, united states	1	110	7
1556	cardiovascular pharmacology, pharmacia and upjohn, inc., kalamazoo, mi, united states	1	90	6
1557	cardiovascular research centre, department of pediatrics, faculty of medicine and dentistry, university of alberta, edmonton, ab, canada	1	14	2
1558	cardiovascular research centre, department of pediatrics, faculty of medicine and dentistry, university of alberta, edmonton, t6g 2s2, ab, canada	1	2	1
1559	carelon research, wilmington, de, united states	1	0	1
1560	cari university hospital, barranquilla, colombia	1	93	10
1561	carilion clinic, roanoke, va, united states	1	7	0
1562	carleton university, ottawa, ont., canada	1	67	1
1563	carlsbad, ca 92008, 1930 palomar point way, united states	1	220	3
1564	carlsbad, ca 92009, 5857 owens avenue, united states	1	64	1
1565	carlsson research ab, biotech center, arvid wallgrens backe 20, se 413 46, göteborg, sweden	1	30	1
1566	carlsson research ab, biotech center, göteborg, arvid wallgrens backe 20, sweden	1	64	4
1567	carlsson research ab, biotech-center, se-413 46 göteborg, arvid wallgrens backe 20, sweden	1	17	1
1568	carlsson research ab, göteborg, sweden	2	71	5
1569	carn-ap boston college william f, connell school of nursing and va boston health care system, boston, ma	1	0	2
1570	carolina institute for developmental disabilities, university of north carolina, chapel hill, nc, united states	1	14	4
1571	carolina partners in mental health care, raleigh, nc, united states	1	18	3
1572	carracci medical group, mexico city, mexico	2	39	7
1573	carrier clinic, belle mead, nj, united states	1	3	0
1574	carrier foundation, belle meade, nj, united states	1	574	9
1575	carter psychology center, bradenton, fl, united states	1	4	3
1576	cas center for excellence in brain science and intelligence technology, shanghai, china	1	6	4
1577	cas key laboratory for receptor research, shanghai institute of materia medica, chinese academy of sciences, 555 zuchongzhi road, shanghai, 201203, china	2	32	6
1578	cas key laboratory for receptor research, shanghai institute of materia medica, chinese academy of sciences, shanghai, china	1	3	2
1579	cas key laboratory of brain function and diseases, department of neurobiology and biophysics, school of life science, university of science and technology of china, hefei, 230027, china	1	18	2
1580	cas key laboratory of mental health, institute of psychology, chinese academy of sciences, beijing, 100101, china	1	7	2
1581	cas key laboratory of mental health, institute of psychology, chinese academy of sciences, beijing, china	1	3	0
1582	cas key laboratory of receptor research and synthetic organic and medicinal chemistry laboratory, shanghai institute of materia medica (simm), chinese academy of sciences, shanghai, 201203, china	1	29	0
1583	cas key laboratory of receptor research drug discovery and design center, shanghai institute of materia medica, chinese academy of sciences (cas), shanghai, 201203, china	1	5	2
1584	cas key laboratory of receptor research, drug discovery and design center, shanghai institute of materia medica, chinese academy of sciences (cas), shanghai, china	1	3	3
1585	casa de saüde do telhal, lisboa, portugal	1	91	2
1586	casa di cura morana, marsala, italy	1	2	3
1587	casa di cura parco del tigli, 35037 teolo padova, via monticello n 1, italy	1	10	1
1588	casa di cura villa serena, associazione l. petruzzi, città sant angelo, pescara, italy	1	61	3
1589	cascadia behavioral healthcare, portland, or, united states	1	0	1
1590	case school of medicine, cleveland, oh, united states	1	15	3
1591	case western reserve university	1	93	10
1592	case western reserve university - psychiatry, cleveland, oh 44106, 11400 euclid ave., united states	1	59	2
1593	case western reserve university hospitals of cleveland, dept. of psychiatry, cleveland, oh 4410, 2040 abington road, united states	1	2	3
1594	case western reserve university school of medicine, cleveland, 44106, oh, 2040 abington road, united states	1	571	0
1595	case western reserve university, cleveland, oh 44106, united states	1	11	0
1596	case western reserve university, cleveland, oh, united states	2	91	7
1597	case western reserve university, department of biochemistry, cleveland, oh 44106, 2109 adelbert road, united states	1	1	0
1598	case western reserve university, department of biology, cleveland, 44106, oh, united states	1	10	4
1599	case western reserve university, department of neurosciences, cleveland, 44106, oh, united states	1	10	4
1600	case western reserve university, department of psychiatry, cleveland, 44106, oh, united states	1	10	4
1601	case western reserve university, school of medicine, biochemistry, cleveland, oh, united states	1	74	1
1602	case western reserve university, school of medicine, cleveland, oh 44106, 2074 abbington rd, united states	1	5	0
1603	case western reserve university, school of medicine, cleveland, oh, united states	1	62	1
1604	case western reserve university, school of medicine, university hospitals, cleveland, united states	1	69	1
1605	case western reserve university, university hospitals case medical center, cleveland, oh, united states	1	15	4
1606	case western reserve university, university hospitals of cleveland, cleveland, oh 44106, 11100 euclid avenue, united states	1	25	1
1607	case western reserve university, university hospitals of cleveland, oh, united states	1	26	3
1608	caserta 1 local health service, caserta, italy	1	60	3
1609	casm, hospital de granollers, mental health care institute, 08400 granollers, barcelona, avda. francesc ribas s/n, spain	1	1	0
1610	cathedral hill research institute, san francisco, ca 94103, 20 gough st, united states	1	261	0
1611	catholic university del sacro cuore, inst. of psychiatry and psychology, roma, italy	1	50	7
1612	catholic university del sacro cuore, institute of psychiatry and psychology, rome, italy	1	17	7
1613	catholic university leuven (kul), university hospital, leuven, belgium	1	33	3
1614	catholic university of croatia, ilica 242, zagreb, 10000, croatia	1	9	2
1615	catholic university of croatia, zagreb, croatia	2	31	3
1616	catholic university of korea college of medicine, bucheon st. mary's hospital, department of psychiatry, wonmi-gu, pucheon, kyounggi-do 420-717, 2 sosa-dong, south korea	1	10	1
1617	catholic university of korea college of medicine, holy family hospital, department of psychiatry, bucheon 420-717, kyounggi-do, sosa-dong, wonmi-gu, south korea	1	48	1
1618	catholic university of leuven, campus kortenberg, kortenberg, belgium	1	6	2
1619	caulfield general medical centre, australia	1	25	1
1620	cb# 7080, 1111 bloinformatics bldg, university of north carolina, chapel hill, nc 27599, united states	1	228	1
1621	cbdb, msc1395, bethesda, md 20982, center drive, united states	1	87	0
1622	cbdb/nimh, bethesda, md 20892, 10 center drive, united states	1	0	1
1623	cbh health, llc, rockville, md, united states	1	138	6
1624	cbm international, bensheim, germany	1	3	9
1625	cea, dsv/i2bm, neurospin, gif-sur-yvette, france	1	7	13
1626	cecil g. sheps center for health services research, university of north carolina at chapel hill, chapel hill, united states	1	7	6
1627	cecil g. sheps ctr. hlth. serv. res., university of north carolina, chapel hill, nc, united states	1	1	5
1628	cedar associates llc, menlo park, ca, united states	1	65	3
1629	cedars sinai medical center, los angeles, ca, united states	1	11	3
1630	cefn coed hospital, swansea, united kingdom	1	21	1
1631	cegedim r&d, boulogne-billancourt, france	1	1	4
1632	ceip-addictovigilance, hôpital fernand-widal, 200, rue du faubourg-saint-denis, paris cedex 10, 75010, france	1	14	1
1633	ceitec (central european institute of technology), masaryk university, 62500 brno, kamenice 5/a19, czech republic	1	178	3
1634	ceitec (central european institute of technology), masaryk university, brno, czech republic	1	117	3
1635	ceitec-mu, department of psychiatry, masaryk university hospital brno, 625 00 brno, jihlavská 20, czech republic	1	10	0
1636	cell and developmental biology graduate program, university of virginia school of medicine, charlottesville, 22908, va, united states	1	4	6
1637	cell and molecular biology division, toronto western research institute, university health network, toronto, ont., canada	1	28	5
1638	cell biology research group, robarts research institute, london, on n6a 5k8, 100 perth drive, canada	1	79	7
1639	cell death disease research center, college of medicine, the catholic university of korea, seoul, south korea	2	4	13
1640	cell signalling research group, division of physiology, pharmacology and neuroscience, school of life sciences, c floor medical school, queen’s medical centre, university of nottingham, nottingham, united kingdom	1	23	1
1641	cellular and molecular biology department, centre de recherche pierre fabre, 81106 castres, 17 avenue jean moulin, france	1	64	1
1642	cellular and molecular neuropharmacology research group, medical school, university of birmingham, birmingham b15 2tt, united kingdom	1	10	0
1643	cellular and molecular research center, department of anatomy, faculty of medicine, iran university of medical sciences, tehran, iran	1	63	5
1644	cellular and molecular research center, iran university of medical sciences (iums), tehran, iran	1	4	6
1645	cellular and molecular research center, iran university of medical sciences, tehran, iran	1	3	4
1646	cellular engineering laboratory, fondazione pisana per la scienza onlus, pisa, 56017, italy	1	13	3
1647	cellular neurobiology unit, crulrg, beauport, qc g1j 2g3, 2601 chemin de la canardière, canada	1	12	1
1648	cellular neurobiology, natl. inst. drug abuse intramural r., baltimore, md, united states	1	122	1
1649	cellular pathobiology unit, dept. of health and human sciences, national institute on drug abuse, baltimore, md, united states	1	283	1
1650	cellular pathobiology unit, dept. of health and human services, national institute on drug abuse, baltimore, md 21209, 5500 nathan shock drive, united states	1	283	1
1651	cellzome ag, elstree, hertfordshire wd6 3sh, 160 centennial avenue, united kingdom	1	164	1
1652	center for addiction and mental health, department of psychiatry, university of toronto, toronto, ont., canada	1	20	4
1653	center for addiction research and department of pharmacology and toxicology, university of texas medical branch, galveston, tx, united states	2	116	39
1654	center for addiction research and education (care) at university of florida, united states	1	14	5
1655	center for addiction research, department of pharmacology and toxicology, university of texas medical branch, galveston, tx 77555-1031, united states	2	180	2
1656	center for addiction research, university of texas medical branch, galveston, tx, united states	1	1	1
1657	center for addiction sciences and therapeutics and department of pharmacology and toxicology, john sealy school of medicine, university of texas medical branch, galveston, tx, united states	1	0	0
1658	center for addiction services, st. francis medical center, pittsburgh, united states	1	19	1
1659	center for addictions and mental health, university of toronto, canada	1	21	4
1660	center for advanced imaging research, department of neurology, medical university of south carolina, charleston, sc 29425, president street, united states	1	55	3
1661	center for advanced imaging research, department of psychiatry, medical university of south carolina, charleston, sc 29425, president street, united states	1	55	3
1662	center for advanced imaging research, department of radiology, medical university of south carolina, charleston, sc 29425, president street, united states	1	55	3
1663	center for aging and developmental biology, aab institute of biomedical sciences, department of biochemistry and biophysics, rochester, ny 14627, 601 elmwood ave, united states	1	206	8
1664	center for aging brain and dementia, department of neurology, university of brescia, italy	1	77	5
1665	center for aging resources, pasadena, ca 91101, 447 n. el molino avenue, united states	1	1	0
1666	center for aging, duke university medical center, durham, nc, united states	1	427	7
1667	center for alcohol and addiction studies, box g-s121-5, providence, ri 02903, united states	1	86	3
1668	center for alcohol studies and department of psychiatry, thurston-bowles building, cb #7178, university of north carolina school of medicine, chapel hill, 27599-7178, nc, united states	1	147	0
1669	center for alcoholism and other addictions, university psychiatric hospital vrapce, zagreb, croatia	1	7	2
1670	center for alochol studies, neuropsychiatric institute, university of california, los angeles, ca, united states	1	75	4
1671	center for alzheimer’s disease and related disorders, institute of psychiatry, federal university of rio de janeiro, rio de janeiro, brazil	1	63	32
1672	center for anxiety and traumatic stress disorders, massachusetts general hospital, harvard medical school, boston, ma, united states	1	0	6
1673	center for applied biomedical research (crba, st. orsola university hospital, bologna, italy	1	2	10
1674	center for autism research and treatment, semel institute, david geffen school of medicine, university of california los angeles, los angeles, 90095, ca, united states	1	67	7
1675	center for autism, pediatric institute, cleveland clinic, cleveland, oh, united states	1	47	6
1676	center for basics in neuromodulation, faculty of medicine, university of freiburg, freiburg, 79106, germany	1	15	6
1677	center for basics in neuromodulation, faculty of medicine, university of freiburg, freiburg, germany	3	116	40
1678	center for basics in neuromodulation, medical center–university of freiburg, faculty of medicine, university of freiburg, freiburg im breisgau, germany	1	2	9
1679	center for behavioral brain sciences, magdeburg, germany	1	66	3
1680	center for behavioral brain sciences, universitätsplatz 2, magdeburg, 39106, germany	1	7	5
1681	center for behavioral cardiovascular health, columbia university irving medical center, new york, ny, united states	1	5	7
1682	center for behavioral health and smart technology, division of general internal medicine, university of pittsburgh, school of medicine, pittsburgh, pa, united states	1	7	3
1683	center for behavioral health, cleveland clinic, cleveland, oh, united states	1	23	1
1684	center for behavioral neuroscience, department of psychiatry and behavioral sciences, emory university, atlanta, ga 30329, 954 gatewood dr., united states	1	55	0
1685	center for behavioral neuroscience, georgia state university, atlanta, ga, united states	1	0	2
1686	center for behavioral neuroscience, institute of experimental psychology, heinrich heine university düsseldorf, germany	1	20	6
1687	center for big data research in health and medicine, the first affiliated hospital of shandong first medical university & shandong provincial qianfoshan hospital, shandong, jinan, china	1	3	3
1688	center for bioethics, harvard medical school, harvard university, boston, ma, united states	1	3	19
1689	center for bioimage informatics, st. jude children's research hospital, memphis, tn, united states	1	4	6
1690	center for biological research, roche biosci. r2-101, 3401 h., palo alto, ca 94304, united states	1	59	4
1691	center for biomarker research and personalized medicine, school of pharmacy, virginia commonwealth university, richmond va, united states	1	36	4
1692	center for biomarker research and personalized medicine, virginia commonwealth university, richmond, 23298, va, united states	1	9	3
1693	center for biomarker research and personalized medicine, virginia commonwealth university, richmond, va, united states	2	113	10
1694	center for biomarker research and precision medicine, virginia commonwealth university school of pharmacy, richmond, va, united states	1	2	3
1695	center for biomarker research and precision medicine, virginia commonwealth university, richmond, 23298, va, united states	1	71	5
1696	center for biomedical informatics, harvard medical school, boston, ma, united states	1	11	1
1697	center for biomolecular interactions, department of biology and chemistry, university of bremen, bremen, germany	1	30	1
1698	center for biostatistical services, university of cincinnati college of medicine, cincinnati, oh 45267-0559, 231 albert sabin way, ml0559, united states	1	32	2
1699	center for biostatistical services, university of cincinnati, college of medicine, cincinnati, oh, united states	1	112	3
1700	center for bipolar disorders research, college of medicine, university of cincinnati, cincinnati, oh, united states	1	33	4
1701	center for bipolar illness intervention in hispanic communities, san antonio, tx, united states	1	226	2
1702	center for bone diseases, lausanne university hospital, lausanne, switzerland	1	2	1
1703	center for brain and cognition, pompeu fabra university, barcelona, 08018, spain	1	0	5
1704	center for brain and cognition, ucsd, la jolla, ca 92093-0109, united states	1	38	0
1705	center for brain neurobiology and neurogenetics, institute of cytology and genetics, siberian branch of the russian academy of sciences, novosibirsk, russian federation	1	17	7
1706	center for brain research, medical university of vienna, spitalgasse 4, vienna, a-1090, austria	1	13	7
1707	center for brain research, medical university of vienna, vienna, austria	3	330	37
1708	center for brain science, the first affiliated hospital of xi’an jiaotong university, 277 yanta west road, xi’an, 710061, china	2	368	36
1709	center for celiac research, university of maryland school of medicine, baltimore, md, united states	1	157	2
1710	center for clinical & health research services, school of life and medical sciences, university of hertfordshire, hatfield, united kingdom	1	91	31
1711	center for clinical epidemiology and biostatistics, university of pennsylvania perelman school of medicine, philadelphia, pa, united states	1	3	4
1712	center for clinical epidemiology and community studies, smbd jewish general hospital, montreal, qc, canada	1	17	7
1713	center for clinical intervention and neuropsychiatric schizophrenia research, copenhagen university hospital, psychiatric university center glostrup, glostrup, denmark	1	102	3
1714	center for clinical intervention and neuropsychiatric schizophrenia research, faculty of health sciences, copenhagen university hospital glostrup, copenhagen dk-2600, denmark	1	42	3
1715	center for clinical metabolic research, copenhagen university hospital - herlev and gentofte, copenhagen, denmark	1	2	4
1716	center for clinical metabolic research, gentofte hospital, university of copenhagen, hellerup, denmark	1	2	3
1717	center for clinical research and prevention, bispebjerg and frederiksberg hospitals, copenhagen, denmark	1	9	2
1718	center for clinical research and treatment of eating disorders, azienda ospedaliera universitaria mater domini, catanzaro, italy	1	3	5
1719	center for clinical studies, department of psychiatry and behavioral sciences, mercer university school of medicine, macon, ga, united states	1	3	3
1720	center for cognition and communication, new york, ny, united states	1	9	5
1721	center for cognition, learning and memory, university of bern, bern, switzerland	1	5	2
1722	center for cognitive medicine, department of psychiatry, university of illinois at chicago, chicago, il 60612, united states	1	1	1
1723	center for cognitive medicine, university of illinois at chicago, chicago, il 60607, united states	1	46	7
1724	center for cognitive medicine, university of illinois at chicago, united states	2	129	2
1725	center for cognitive medicine, university of illinois, chicago college of medicine, united states	1	10	2
1726	center for cognitive neuroscience, duke university, durham, nc, united states	1	43	7
1727	center for cognitive neuroscience, neuroscience and behavioral disorders program, duke-national university of singapore graduate medical school, 8 college road, singapore, 169857, singapore	1	43	7
1728	center for cognitive science, rutgers, the state university of new jersey, united states	1	10	8
1729	center for computational systems medicine, school of biomedical informatics, university of texas health science center, houston, 77030, tx, united states	1	7	1
1730	center for crisis psychology, faculty of psychology, university of bergen, bergen, norway	1	4	5
1731	center for depression, anxiety and stress research, mclean hospital & harvard medical school, belmont, ma, united states	1	10	1
1732	center for developmental science, cb# 8115, university of north carolina, chapel hill, nc 27599-8115, united states	1	125	1
1733	center for drug and alcohol programs, medical university of south carolina, charleston, sc, united states	1	57	4
1734	center for drug discovery research, school of pharmacy, temple university, philadelphia, pa 19140, 3307 north broad street, united states	1	25	0
1735	center for drug discovery technologies, drug discovery division, korea research institute of chemical technology, daejeon, 305-606, 100 chang-dong, yuseong-gu, south korea	1	43	1
1736	center for drug discovery technology, korea research institute of chemical technology, south korea	1	1	3
1737	center for drug discovery, department of pharmaceutical sciences, northeastern university, boston, 02115-5000, ma, united states	1	5	5
1738	center for drug discovery, northeastern university, boston, 02115, ma, united states	1	26	4
1739	center for drug discovery, northeastern university, boston, ma 02115, 360 huntington avenue, united states	1	26	7
1740	center for drug discovery, northeastern university, boston, ma, united states	3	40	13
1741	center for ethics in health care, ohsu, portland, united states	1	50	2
1742	center for evidence-based psychiatry, psychiatric research unit, slagelse, region zealand psychiatry, denmark	1	54	2
1743	center for foreign language translation, college of foreign languages, shandong university of traditional chinese medicine, ji’nan, 250355, china	1	8	4
1744	center for forensic mental health, school of medicine, chiba university, chiba, japan	1	172	8
1745	center for gender-specific medicine, biomarkers unit, istituto superiore di sanità, viale regina elena 299, rome, 00161, italy	1	0	5
1746	center for gene and cell therapy, institute of medical science, university of tokyo, tokyo, japan	1	14	2
1747	center for gene therapy, allegheny univ. of the hlth. sci., mail stop 421, philadelphia, pa 19102-1192, 245 north 15 st., united states	1	7	0
1748	center for general education, cheng shiu university, kaohsiung, taiwan	1	5	6
1749	center for general education, college of humanities and social sciences, chang jung christian university, tainan, taiwan	1	25	5
1750	center for genetic analysis of behavior, national institute for physiological sciences, myodaiji, okazaki, aichi 444-8585, japan	1	26	14
1751	center for genetics and genetic technologies, faculty of biology, moscow state university, moscow, 119234, russian federation	1	0	4
1752	center for genetics and life science, sirius university of science and technology, krasnodar krai, sirius, 354340, russian federation	1	0	4
1753	center for genomic medicine, massachusetts general hospital, 185 cambridge street, cpzn 6240, boston, 02114, ma, united states	1	13	2
1754	center for genomic regulation (crg), the barcelona institute of science and technology, barcelona, spain	1	6	20
1755	center for geriatric and gerontology, kaohsiung veterans general hospital, kaohsiung, taiwan	1	16	11
1756	center for gerontology & healthcare research, brown university, school of public health, providence, ri, united states	1	0	5
1757	center for global infectious disease research, seattle children's research institute, seattle, wa, united states	1	169	16
1758	center for health equity research and promotion, corporal michael j. crescenz va medical center, philadelphia, pa, united states	1	3	6
1759	center for health equity research and promotion, veterans affairs pittsburgh health system, pittsburgh, pa, united states	1	63	13
1760	center for health policy and research, university of massachusetts medical school, shrewsbury, ma 01545, 333 south st. 13e779, united states	1	39	3
1761	center for health promotion and prevention research, university of texas, school of public health, houston, united states	1	25	1
1762	center for health quality, outcomes and economic research, department of veterans affairs, bedford, ma, united states	1	63	13
1763	center for health quality, outcomes, and economic research (chqoer), edith nourse rogers memorial veterans hospital, bedford, ma, united states	1	21	4
1764	center for health research, kaiser permanente northwest, portland, or, united states	1	15	6
1765	center for health services and nursing research, ku leuven, leuven, belgium	1	8	7
1766	center for health statistics, university of illinois at chicago, chicago, il, united states	1	9	2
1767	center for health studies, group health cooperative, seattle, wa, united states	1	866	27
1768	center for health systems effectiveness, department of emergency medicine, oregon health and science university, portland, or, united states	1	10	3
1769	center for healthy minds, university of wisconsin-madison, madison, wi, united states	1	38	3
1770	center for human genetic research, massachusetts general hospital, boston, ma, united states	1	40	3
1771	center for human genetics, duke university medical center, durham, nc, united states	1	10	5
1772	center for human molecular genetics, faculty of biology, university of belgrade, belgrade, serbia	1	29	3
1773	center for human studies on stress, department of psychiatry, douglas hospital, mcgill university, verdun, que., canada	1	301	8
1774	center for in vivo imaging and therapeutics, st. jude children's research hospital, memphis, tn, united states	1	4	6
1775	center for individualized medicine, mayo clinic, rochester, mn, united states	1	159	4
1776	center for infant/child development, neuroscience program, university of south florida, tampa, fl 33613, 3515 e. fletcher avenue, united states	1	0	0
1777	center for infection and immunity, columbia university mailman school of public health, new york, ny 10032, 722 w 168th st., 17th floor, united states	1	65	0
1778	center for innate immunity and immune disease, department of pediatrics, university of washington, seattle, wa, united states	1	169	16
1779	center for innovation in mental health, school of psychology, faculty of environmental and life sciences, university of southampton, southampton, united kingdom	1	70	22
1780	center for innovative care in aging, johns hopkins university, baltimore, md, united states	1	773	6
1781	center for integrated molecular brain imaging, copenhagen university hospital, rigshospitalet, copenhagen, denmark	2	110	4
1782	center for integrated molecular brain imaging, faculty of health sciences, copenhagen university hospital rigshospitalet, copenhagen, denmark	1	42	3
1783	center for integration of medicine and innovative technology, harvard medical school, boston, ma, united states	1	17	19
1784	center for integrative cardiovascular and metabolic disease, university of florida, gainesville, fl, united states	1	1	4
1785	center for integrative genomics, university of lausanne, bep 1015 lausanne-dorigny, switzerland	1	33	2
1786	center for intelligent public health, institute for artificial intelligence, peking university, beijing, 100191, china	1	89	5
1787	center for interdisciplinary brain sciences research, department of psychiatry and behavioral sciences, school of medicine, stanford university, stanford, california, united states	1	5	2
1788	center for interdisciplinary research on applied neurosciences (napna), usp, são paulo, brazil	1	3	4
1789	center for kampo medicine, keio university school of medicine, tokyo, japan	1	1	7
1790	center for lifespan psychology, max planck institute for human development, lentzeallee 94, berlin, 14195, germany	1	90	1
1791	center for long-term care quality & innovation, brown university, school of public health, providence, ri, united states	1	0	5
1792	center for magnetic resonance research, university of minnesota medical school, minneapolis, united states	1	18	6
1793	center for medical research and education, graduate school of medicine, osaka university, osaka, 565-0871, japan	1	16	5
1794	center for medicare medication management, university of the sciences in philadelphia, philadelphia, pa 19104, 600 south 43rd street, united states	1	22	5
1795	center for medicinal chemistry, drug discovery division, korea research institute of chemical technology, daejeon, 305-606, 100 chang-dong, yuseong-gu, south korea	1	43	1
1796	center for mental health marienheide, germany	1	6	0
1797	center for mental health, university hospital of würzburg, würzburg, germany	1	7	2
1798	center for mental healthcare adhesie, deventer, netherlands	1	117	2
1799	center for military psychiatry and neuroscience, walter reed army institute of research, silver spring, 20910, ma, united states	1	9	3
1800	center for mind and brain, uc davis, ca, united states	1	5	4
1801	center for mind, brain and behavior, university of marburg, germany	1	14	8
1802	center for modern interdisciplinary technologies, neurocognitive laboratory, wileńska 4, torun, 87-100, poland	1	32	4
1803	center for molecular and behavioural neuroscience, rutgers university, newark, nj 07102, 197 university avenue, united states	1	198	16
1804	center for molecular and cognitive neuroscience, charles university in prague, prague, czech republic	1	9	2
1805	center for molecular and medical sciences mass spectrometry, department of chemistry and biochemistry, department of psychiatry and biobehavioral sciences, los angeles, ca, united states	1	42	2
1806	center for molecular and vascular biology, university of leuven, leuven, belgium	1	21	1
1807	center for molecular medicine, department of clinical neuroscience, karolinska institutet, stockholm, sweden	1	18	1
1808	center for molecular medicine, karolinska institute, stockholm, sweden	1	26	4
1809	center for molecular neuroscience, molecular physiology and biophysics and psychiatry, vanderbilt university school of medicine, nashville, tn 37232-8548, united states	1	29	1
1810	center for molecular neuroscience, vanderbilt university school of medicine, nashville, tn, united states	2	535	12
1811	center for molecular neuroscience, vanderbilt university, nashville, tn, united states	1	219	7
1812	center for molecular recognition, columbia university, new york, ny 10032, 630 west 168th street, united states	1	11	1
1813	center for morphometric analysis, massachusetts general hospital, boston, ma, united states	1	5	4
1814	center for movement disorders, institute of neurosciences kolkata, west bengal, kolkata, india	1	9	12
1815	center for nanotechnology innovation, italian institute of technology, iit and nest, pisa 56127, piazza san silvestro, 12, italy	1	11	0
1816	center for neonatal screening, department for congenital disorders, statens serum institut, copenhagen, denmark	1	925	73
1817	center for neural science, new york university, new york, ny 10003, 4 washington place, united states	1	33	1
1818	center for neural science, new york university, new york, ny, united states	2	94	12
1819	center for neuro-oncology, dana-farber cancer institute and harvard medical school, boston, ma, united states	1	2	18
1820	center for neurobehavioral genetics, semel institute for neuroscience and human behavior, university of california, los angeles, los angeles, ca 90095, 695 charles e young drive south, united states	1	42	11
1821	center for neurobehavioral genetics, semel institute for neuroscience and human behavior, university of california, los angeles, los angeles, ca, united states	1	14	10
1822	center for neurobehavioral genetics, ucla, los angeles, ca, united states	1	11	5
1823	center for neurobehavioral genetics, university of california los angeles, los angeles, 90095, ca, united states	1	67	7
1824	center for neurobehavioral rehabilitation, waltham, united states	1	11	4
1825	center for neurobiology and behavior, columbia university college of physicians and surgeons, new york state psychiatric institute, ny, united states	1	8	5
1826	center for neurobiology and behavior, columbia university, new york, ny 10032, 722 w. 168th st., united states	1	9	0
1827	center for neurobiology and behavior, columbia university, new york, ny 10032, united states	2	133	5
1828	center for neurobiology and behavior, columbia university, new york, ny, united states	1	73	2
1829	center for neurobiology and behavior, department of psychiatry, university of pennsylvania, philadelphia, pa 19104-3403, 2216 trl, 25 south 31st street, united states	1	24	2
1830	center for neurobiology and behavior, new york state psychiatric institute, columbia university college of physicians and surgeons, new york, ny 10032, united states	1	62	3
1831	center for neurodegenerative disease research (cesne), department of neuroscience, university of padova, padova, italy	1	0	5
1832	center for neuroengineering, duke university medical center, durham, 27710, nc, united states	1	0	4
1833	center for neuroimmunology, institute of biomedical research august pi sunyer (idibaps), barcelona, spain	1	9	1
1834	center for neurolinguistics and theoretical syntax (nets), institute for advanced study, (iuss), pavia, italy	1	36	3
1835	center for neurological restoration, cleveland clinic, cleveland, oh, united states	1	12	3
1836	center for neurological restoration, neurological institutes, cleveland clinic, cleveland, oh, united states	1	0	0
1837	center for neuromodulation in depression and stress (cnds), department of psychiatry, perelman school of medicine, university of pennsylvania, philadelphia, pa, united states	1	2	10
1838	center for neuropharmacology and neuroscience, albany medical college, albany, ny 12208, united states	1	19	0
1839	center for neuropharmacology and neuroscience, albany medical college, albany, ny, united states	2	276	37
1840	center for neuropharmacology and neuroscience, mc-136, albany medical college, albany, ny 12208, 47 new scotland ave., united states	1	163	1
1841	center for neuropharmacology, national research council, 09124-i cagliari, italy	1	22	2
1842	center for neuroproteomics and biomarkers research, mcknight brain institute, department of psychiatry, gainesville, fl 32611, 100 s newell drive, united states	1	27	5
1843	center for neuropsychiatric research, national health research institutes, 35 keyan rd. zhunan, miaoli, 35053, taiwan	2	30	11
1844	center for neuropsychiatric schizophrenia research (cnsr) and center for clinical intervention and neuropsychiatric schizophrenia research (cins), academic hospital glostrup, glostrup, denmark	1	2	5
1845	center for neuropsychiatric schizophrenia research (cnsr), center for clinical intervention and neuropsychiatric schizophrenia research (cins), copenhagen university hospital, dk-2600 glostrup, ndr. ringvej 29-67, denmark	1	20	1
1846	center for neuropsychiatric schizophrenia research (cnsr), faculty of health sciences, copenhagen university, glostrup, denmark	1	51	0
1847	center for neuropsychiatric schizophrenia research (cnsr), mental health center glostrup, copenhagen university hospital, denmark	1	18	3
1848	center for neuropsychiatric schizophrenia research, center for clinical intervention and neuropsychiatric schizophrenia research, copenhagen university hospital glostrup, dk-2600 glostrup, nordre ringvej 29, denmark	1	70	1
1849	center for neuropsychiatric schizophrenia research, cnsr & centre for clinical intervention and neuropsychiatric schizophrenia research, cins, mental health centre glostrup, university of copenhagen, glostrup, denmark	1	2	3
1850	center for neuropsychiatric schizophrenia research, copenhagen university hospital, psychiatric center glostrup, denmark	1	106	6
1851	center for neuropsychiatric schizophrenia research, faculty of health sciences, center for clinical intervention and neuropsychiatric schizophrenia res., psychiatric center glostrup, copenhagen university hospital glostrup, denmark	1	21	2
1852	center for neuropsychiatric schizophrenia research, faculty of health sciences, copenhagen university hospital glostrup, copenhagen dk-2600, denmark	1	42	3
1853	center for neuropsychiatric schizophrenia research, psychiatric center glostrup, copenhagen university hospital, glostrup, denmark	1	100	2
1854	center for neuropsychiatric schizophrenia research, university of copenhagen, bispebjerg hospital, copenhagen, denmark	1	56	5
1855	center for neuropsychiatric schizophrenia research, university of copenhagen, psychiatric center glostrup, denmark	1	23	1
1856	center for neuropsychiatric schizophrenia research, university of copenhagen, psychiatric university centre glostrup, copenhagen, denmark	1	56	5
1857	center for neuropsychiatric schizophrenia, research and center for clinical intervention and neuropsychiatric schizophrenia research, copenhagen university hospital, glostrup, denmark	1	5	2
1858	center for neuroscience and behavioral medicine, children's national medical center, george washington university school of medicine, washington, dc, united states	1	185	12
1859	center for neuroscience and cell biology, institute of biochemistry, university of coimbra, 3004-504 coimbra, portugal	1	51	0
1860	center for neuroscience and neurological recovery, methodist rehabilitation center, jackson, ms, united states	1	7	2
1861	center for neuroscience and schizophrenia, university of colorado health sciences center, denver, co, united states	1	29	8
1862	center for neuroscience and the imaging research center, university of california at davis, davis, ca, 1544 newton court, united states	1	57	7
1863	center for neuroscience discovery university of north texas health science center fort worth, tx, united states	1	123	1
1864	center for neuroscience of coimbra, department of neurochemistry, university of coimbra, 3004-517 coimbra, portugal	2	4	10
1865	center for neuroscience of coimbra, university of coimbra, coimbra, portugal	1	1	6
1866	center for neuroscience research, university at albany, suny, albany, ny 12222, 1400 washington avenue, united states	1	74	2
1867	center for neuroscience research, university at albany-suny, albany, ny 12222, 1400 washington avenue, united states	1	14	3
1868	center for neuroscience, center for the neural basis of cognition, university of pittsburgh, pittsburgh, pa, united states	1	170	2
1869	center for neuroscience, sri international, menlo park, ca, united states	2	164	8
1870	center for neuroscience, swammerdam institute for life sciences, university of amsterdam, 1098 sm amsterdam, kruislaan 320, netherlands	2	35	2
1871	center for neuroscience, university of california, davis, 1544 newton court, davis, 95618, ca, united states	1	135	2
1872	center for neuroscience, university of melbourne, vic, australia	1	114	5
1873	center for neuroscience-swammerdam, institute for life sciences, university of amsterdam, 1098 sm amsterdam, kruislaan 320, netherlands	1	36	1
1874	center for nutrition and weight management, boston medical center, school of medicine, boston university, 88 east newton street robinson bldg, suite 4400, boston, 02118, ma, united states	1	17	1
1875	center for ocd and related disorders, massachusetts general hospital, harvard medical school, boston, ma, united states	1	0	6
1876	center for pain and the brain (pain group), department of anesthesiology, critical care & pain medicine, boston children’s hospital, boston, 02115, ma, united states	1	16	17
1877	center for parkinson's disease and movement disorders, department of neurology, vikram hospital, bangalore, karnataka, india	1	9	12
1878	center for pediatric clinical effectiveness, united states	1	47	10
1879	center for personality disorders, psychiatric clinic, turin, 10126, italy	1	13	1
1880	center for pharmacoepidemiology research and training, department of biostatistics, epidemiology, and informatics, university of pennsylvania perelman school of medicine, philadelphia, pa, united states	1	3	4
1881	center for physiology and pharmacology, institute of pharmacology, medical university of vienna, austria	1	75	1
1882	center for psychedelic and consciousness research, department of psychiatry and behavioral sciences, johns hopkins university, baltimore, md, united states	1	5	2
1883	center for psychedelic drug research and education, the ohio state university college of social work, columbus, oh, united states	1	5	2
1884	center for psychiatric genetics, evanston nw hlthcare. (enh) res. i., enh and northwestern university, evanston, il 60201, 1001 university place, united states	1	83	8
1885	center for psychiatric genetics, evanston nw hlthcare. (enh) res. i., enh and northwestern university, evanston, il, united states	1	83	8
1886	center for psychiatric genetics, northshore university healthsystem research institute, university of chicago, evanston, il 60201, united states	1	157	1
1887	center for psychiatric genomics, department of genetics, university of north carolina, chapel hill, nc, united states	1	925	73
1888	center for psychiatric genomics, university of north carolina, 5097 genetic medicine building, chapel hill, 27599-7264, nc, united states	1	18	6
1889	center for psychiatric neuroscience, department of psychiatry and human behavior, university of mississippi medical center, jackson, ms, united states	1	35	5
1890	center for psychiatric neuroscience, department of psychiatry, university of lausanne, lausanne, switzerland	1	38	5
1891	center for psychiatric neuroscience, feinstein institute for medical research, manhasset, ny, united states	4	427	69
1892	center for psychiatric neuroscience, the feinstein institute for medical research, north shore-long island jewish health system, manhasset, ny 11030, united states	1	23	5
1893	center for psychiatric research, aarhus university hospital, risskov 8240, denmark	1	32	4
1894	center for psychiatric research, maine medical center research institute, maine medical center, portland, me 04102, 22 bramhall street, united states	1	15	1
1895	center for psychiatry research, department of clinical neuroscience, karolinska institutet & stockholm health care services, region stockholm, stockholm, sweden	1	6	10
1896	center for psychiatry research, department of clinical neuroscience, karolinska institutet & stockholm health care services, stockholm county council, stockholm, sweden	1	18	1
1897	center for psychiatry research, department of women's and children's health, stockholm health care services & karolinska institutet, stockholm, sweden	1	20	3
1898	center for psychiatry research, stockholm city council, stockholm, sweden	4	159	28
1899	center for psychobiology and behavioral medicine, university of giessen, 35394 giessen, otto-behaghel-street 10f, germany	1	76	2
1900	center for psychobiology and behavioral medicine, university of giessen, giessen, germany	1	76	2
1901	center for psychopharmacology, diakonhjemmet hospital, oslo, norway	2	941	76
1902	center for psychosocial medicine, department of general psychiatry, heidelberg university, heidelberg, germany	1	90	5
1903	center for research in medical pharmacology, university of insubria, varese, italy	1	2	2
1904	center for research on health care, department of medicine, university of pittsburgh, pittsburgh, pa, united states	1	7	3
1905	center for research prevention and treatment of atherosclerosis, hadassah hebrew university medical center, jerusalem, israel	1	1	1
1906	center for special problems, san francisco, ca, united states	1	13	2
1907	center for special studies, new york presbyterian hospital, weill med. coll. of cornell univ., new york, ny, united states	1	5	0
1908	center for spirituality and healing, academic health center, university of minnesota, minneapolis, mn 55455, 420 delaware st. se, united states	1	9	4
1909	center for statistical genetics, gertrude h. sergievsky center, department of neurology, columbia university medical center, new york, 10032, ny, united states	1	4	2
1910	center for structural and functional neuroscience, university of montana, missoula, mt, united states	1	36	1
1911	center for studies of psychological application, south china normal university, guangzhou, china	1	0	6
1912	center for synaptic brain dysfunction, institute for basic science, daejeon, south korea	1	1	3
1913	center for synaptic neuroscience and technology, istituto italiano di tecnologia, genoa, italy	1	4	2
1914	center for the advancement in managing pain, university of connecticut, school of nursing storrs, united states	1	15	4
1915	center for the assessment of pharmaceutical practices (capp), health services department (t-3w), talbot building, boston, ma 02118, 715 albany street, united states	1	21	4
1916	center for the assessment of pharmaceutical practices (capp), health services department, boston university school of public health, boston, ma, united states	1	21	4
1917	center for the neurobiology of learning and memory, department of neurobiology and behavior, university of california, irvine, ca, united states	1	301	8
1918	center for the neurobiology of learning and memory, department of neurobiology and behaviour, university of california, irvine, ca 92697-3800, united states	1	1175	0
1919	center for the neurobiology of stress resilience and psychiatric disorders, discipline of cellular and molecular pharmacology, the chicago medical school, rosalind franklin university of medicine and science, 3333 green bay road, north chicago, il, united states	1	0	0
1920	center for the study of ethics in the professions, illinois institute of technology, chicago, il, united states	1	4	0
1921	center for the study of human health, emory college of arts and sciences, emory university, atlanta, ga, united states	1	3	19
1922	center for the study of the human genome, department of biology, university of são paulo, cep 05508-900, sp, brazil	1	28	3
1923	center for the study of traumatic stress, department of psychiatry, uniformed services university of the health sciences, bethesda, md 20814, 4301 jones bridge road, united states	1	11	1
1924	center for the study of traumatic stress, department of psychiatry, uniformed services, university of the health sciences, bethesda, md 20814, united states	1	4	0
1925	center for the study of traumatic stress, uniformed services university of the health sciences, bethesda, md, united states	1	11	1
1926	center for the support of research in applied neuroscience, university of são paulo, são paulo, sp, brazil	1	19	3
1927	center for theoretical biological physics, rice university, houston, tx, united states	1	62	4
1928	center for therapeutic innovation, hussman institute for human genomics, university of miami miller school of medicine, miami, fl, united states	1	184	2
1929	center for therapeutic innovation, university of miami, miami, fl, united states	1	19	3
1930	center for tissue regeneration and engineering at dayton (trend), university of dayton, dayton, oh, united states	1	0	2
1931	center for transdisciplinary research, niigata university, niigata, japan	1	14	1
1932	center for translational biomedicine, skolkovo institute of science and technology, moscow, russian federation	1	45	6
1933	center for translational medicine, the first affiliated hospital of xi’an jiaotong university, 277 yanta west road, xi’an, 710061, china	2	368	36
1934	center for translational neuroscience, northeastern university, boston, ma, united states	1	0	2
1935	center for translational neuroscience, university of arkansas for medical sciences, little rock, ar, united states	1	6	1
1936	center for translational neurosciences, illawarra health and medical research institute, university of wollongong, wollongong, nsw, australia	1	58	2
1937	center for translational research, copenhagen university hospital - bispebjerg and frederiksberg, copenhagen, denmark	1	2	4
1938	center for translational systems biology, mount sinai school of medicine, new york ny 10029, united states	1	25	3
1939	center for translational systems biology, mount sinai school of medicine, new york, ny 10029, 1425 madison avenue, box 1137, united states	1	200	3
1940	center for translational systems biology, mount sinai school of medicine, new york, ny 10029, 1425 madison avenue, box 1229, united states	1	35	3
1941	center for translational systems biology, mount sinai school of medicine, new york, ny 10029, united states	7	1408	33
1942	center for translational systems biology, mount sinai school of medicine, new york, ny, 10029, united states	1	42	2
1943	center for treatment of borderline personality disorder, mclean hospital, harvard medical school, belmont, ma, united states	1	8	3
1944	center for value-based medicine, flourtown, united states	1	7	6
1945	center for weight and eating disorders, university of pennsylvania school of medicine, philadelphia, pa 19104-3309, 3535 market street, suite 3108, united states	1	50	2
1946	center for women’s reproductive mental health, the johns hopkins university school of medicine, 550 n. broadway, baltimore, 21205, md, united states	1	4	7
1947	center nanoscale microscopy and molecular physiology of the brain (cnmpb), göttingen, germany	1	18	10
1948	center of bio- and chemoinformatics, i.m. sechenov first moscow state medical university, moscow, russian federation	1	2	2
1949	center of brain research, medical university of vienna, vienna, austria	1	4	4
1950	center of clinical pharmacology and pharmacy department, the third xiangya hospital, central south university, changsha, china	1	10	3
1951	center of clinical psychopharmacology, department of neurosciences b.b. brodie, university of cagliari, cagliari, italy	1	13	4
1952	center of clinical research, samsung biomedical research institute, seoul, 135-710, 50 ilwon-dong, kangnam-gu, south korea	1	70	3
1953	center of clinical, experimental surgery and translational research, biomedical research foundation of the academy of athens (brfaa), athens, greece	1	11	3
1954	center of excellence for pharmaceutical sciences, school of pharmacy, north west university, potchefstroom, south africa	1	34	1
1955	center of excellence for pharmaceutical sciences, school of pharmacy, north-west university, potchefstroom, south africa	2	104	3
1956	center of excellence for stress and mental health, veteran affairs san diego healthcare system, san diego, ca 92161, 3350 la jolla village drive, united states	1	37	2
1957	center of excellence in applied neurosciences of santa catarina (nenasc), health sciences unit, unesc, criciúma, sc, brazil	1	25	2
1958	center of excellence in behavioural medicine, nguyen tat thanh university, ho chi minh city, 60000, viet nam	1	2	9
1959	center of excellence in cardiac electrophysiology research, chiang mai university, chiang mai, 50200, thailand	1	16	4
1960	center of excellence in health disparities research, college of pharmacy and health sciences, texas southern university, houston, tx, united states	1	2	4
1961	center of excellence in higher education for pharmaceutical care innovation, universitas padjadjaran, jatinangor, indonesia	1	8	3
1962	center of excellence in mood disorders, faillace department of psychiatry and behavioral sciences, mcgovern medical school, the university of texas health science center at houston, houston, tx, united states	1	54	11
1963	center of excellence in neuroscience, texas tech university health sciences center, el paso, tx, united states	1	0	25
1964	center of excellence on mood disorders, department of psychiatry and behavioral sciences, mcgovern medical school, university of texas health science center at houston (uthealth), houston, tx, united states	1	33	3
1965	center of excellence on neurodegenerative diseases, università degli studi di milano, milan, italy	1	32	2
1966	center of expertise, treatment, rehabilitation and recovery of people with severe mental illness, phrenos, po box 1203, utrecht, 3500 be, netherlands	1	12	4
1967	center of general education, school of liberal arts education, chang jung christian university, tainan, taiwan	1	10	7
1968	center of genetic medicine, hospital, university of yamanashi, kofu, japan	1	10	3
1969	center of human and clinical genetics, department of human genetics, leiden university medical center, leiden, netherlands	1	13	1
1970	center of innovative research, banyan biomarkers, inc., alachua, fl 32615, 12085 research drive, united states	1	27	5
1971	center of medical and psychological rehabilitation of children, national children’s specialized hospital “ohmatdyt”, kyiv, ukraine	1	0	11
1972	center of medical genetics and molecular medicine, haukeland university hospital, 5021 bergen, norway	1	6	3
1973	center of molecular biology and pharmacogenetics, scientific and technological bioresource nucleus, universidad de la frontera, temuco, chile	1	10	18
1974	center of neuropharmacology, department of pharmacological and biomolecular sciences, università degli studi di milano, 20133 milan, via balzaretti 9, italy	1	32	2
1975	center of neuropharmacology, department of pharmacological sciences, 20133 milan, via balzaretti 9, italy	1	10	1
1976	center of neuropharmacology, department of pharmacological sciences, university of milan, 20133 milan, via balzaretti 9, italy	1	15	3
1977	center of neuropharmacology, department of pharmacological sciences, university of milan, milan, italy	1	15	3
1978	center of neuropharmacology, dept. of pharmacological sciences, university of milan, 20133 milan, via balzaretti 9, italy	1	48	0
1979	center of neurosurgery, department of general neurosurgery, university of cologne, cologne, germany	1	2	18
1980	center on aging, university of texas medical branch, galveston, tx, united states	1	17	5
1981	center on translational neuroscience, college of life and environmental sciences, minzu university of china, beijing, china	1	13	3
1982	centers for disease control and prevention, national institute for occupational safety and health (cdc-niosh), morgantown, 26505, wv, united states	1	86	4
1983	centers of mental health, azienda usl 5, messina, italy	4	179	9
1984	centers of mental health, messina, azienda usl 5, italy	1	63	1
1985	centers of mental health, messina, italy	1	119	3
1986	centocor, superior, co, united states	1	22	3
1987	centr. inst. f. nerv. and ment. dis., budapest-lipótmezo, hungary	1	16	0
1988	central adelaide local health network, the queen elizabeth hospital, adelaide, australia	1	0	3
1989	central adelaide local health network, the royal adelaide hospital, adelaide, sa, australia	1	0	3
1990	central and north west london nhs foundation trust, london, uk, united kingdom	1	0	4
1991	central chemical lab., academic hospital, free university, amsterdam, netherlands	1	88	2
1992	central connecticut state university, united states	1	30	4
1993	central facility of instrumentation, school of pharmaceutical sciences, iftm university, moradabad, 244001, india	1	8	0
1994	central forensic state hospital, uchtspringe, germany	1	3	1
1995	central hospital for psychiatry, wiesloch, germany	1	42	4
1996	central hospital pharmacy 1, me 's-hertogenbosch, 5200, p.o. box 90,153, netherlands	1	4	0
1997	central hospital, department of psychiatry, aalesund, norway	1	184	5
1998	central institute for mental health mannheim (zi), university of heidelberg, germany	1	4	2
1999	central institute for nervous and mental diseases, budapest-lipótmezo, hungary	1	15	0
[truncated: 26,061 more rows]

## Sheet: Articles
id	document	citations	total link strength
543	meltzer (1989a)	571	682
544	meltzer (1989b)	90	487
587	bersani (1990)	65	364
602	murphy (1990)	115	381
628	jann (1991)	131	279
633	siever (1991)	113	586
658	arora (1991)	152	574
670	meltzer (1991)	278	1220
677	devaud (1992)	57	631
690	pickar (1992)	345	436
724	perregaard (1992)	96	376
759	nyberg (1993)	210	596
788	hashimoto (1993)	106	393
797	kahn (1993a)	60	600
799	owen (1993)	58	481
811	leysen (1993)	358	773
815	krystal (1993)	98	675
824	liégeois (1993)	65	525
853	laruelle (1993)	220	370
854	casey (1993)	66	411
856	kahn (1993b)	72	397
858	joyce (1993a)	321	408
870	joyce (1993b)	108	602
875	ohuoha (1993)	70	608
898	rao (1994)	60	326
911	norman (1994)	72	393
916	pehek (1994)	78	491
925	kitaichi (1994)	55	464
952	morilak (1994)	66	296
973	hirschfeld (1994)	491	152
984	cohen (1994)	68	345
985	grant (1994)	166	468
1005	nomikos (1994)	125	953
1014	goldstein (1994)	67	234
1026	strupczewski (1995)	86	446
1033	he (1995)	95	832
1047	sodhi (1995)	175	289
1073	nordström (1995)	338	536
1084	noda (1995)	194	340
1086	varty (1995)	234	254
1101	schotte (1995)	84	645
1114	svensson (1995)	164	425
1119	brunello (1995)	188	611
1135	farde (1995)	162	769
1169	dewey (1995)	210	549
1188	huttunen (1995)	63	711
1215	howard (1996)	87	300
1216	kehne (1996a)	68	425
1217	padich (1996)	113	434
1218	burnet (1996a)	270	670
1219	kapur (1996a)	60	600
1248	simpson (1996)	101	450
1266	dean (1996)	104	355
1280	norman (1996a)	197	384
1305	pehek (1996)	58	550
1306	jeste (1996)	74	219
1307	rothschild (1996)	50	280
1312	kinon (1996)	331	625
1326	meltzer (1996a)	80	330
1336	ashby jr. (1996)	165	587
1337	merchant (1996)	90	336
1347	fischman (1996)	71	740
1348	nyberg (1996)	82	605
1352	meltzer (1996b)	69	857
1353	kehne (1996b)	352	799
1354	richelson (1996)	158	658
1367	thase (1996)	106	133
1369	meltzer (1996c)	64	385
1372	schotte (1996)	1124	1058
1374	hertel (1996)	119	1128
1378	swerdlow (1996)	165	507
1380	wadenberg (1996)	140	442
1387	leonard (1996)	66	347
1390	kapur (1996b)	779	1360
1398	dursun (1996)	62	301
1403	norman (1996b)	55	396
1410	burnet (1996b)	82	684
1434	burnet (1997)	164	375
1449	sweeney (1997)	50	251
1484	weinberger (1997)	142	262
1498	green (1997)	412	315
1499	sipes (1997)	113	271
1501	florijn (1997)	88	375
1523	bymaster (1997)	161	899
1539	martin (1997)	75	423
1547	young (1997)	69	309
1548	carlsson (1997)	185	362
1564	busatto (1997)	72	1829
1566	kapur (1997)	90	686
1571	wilkins (1997)	66	291
1572	jentsch (1997)	71	287
1576	vollenweider (1997)	349	455
1593	hertel (1997)	71	958
1612	kunugi (1997)	294	187
1625	okuyama (1997)	50	467
1638	abi-dargham (1997)	200	1951
1665	travis (1998)	66	302
1667	kapur (1998a)	358	878
1668	roth (1998a)	268	600
1669	jakab (1998)	444	469
1673	lee (1998)	53	303
1674	tollefson (1998)	132	404
1676	malhotra (1998)	125	646
1680	kapur (1998b)	77	844
1690	newman-tancredi (1998)	237	486
1692	mendes de oliveira (1998)	75	236
1705	trichard (1998a)	110	533
1712	broderick (1998)	52	574
1756	lesch (1998)	329	325
1757	cyr (1998)	95	326
1778	arvanov (1998)	75	502
1796	goff (1998)	62	1384
1808	trichard (1998b)	75	314
1810	kawanishi (1998)	60	284
1812	bever (1998)	62	270
1828	powchik (1998)	152	333
1834	vollenweider (1998)	699	333
1848	leysen (1998)	51	637
1856	martin (1998)	83	1028
1866	farber (1998)	64	360
1867	lieberman (1998)	191	1405
1868	roth (1998b)	99	1567
1871	masellis (1998)	231	585
1876	fink (1998)	217	450
1888	sharma (1998)	124	460
1893	marek (1998)	95	965
1896	kroeze (1998)	121	808
1907	gefvert (1998)	178	501
1913	rao (1998)	68	181
1915	swerdlow (1998)	561	813
1921	vollenweider (1999)	229	768
1922	abi-saab (1999)	142	353
1924	blin (1999)	103	925
1934	jentsch (1999)	82	573
1936	bymaster (1999)	173	585
1958	dean (1999)	139	383
1963	kapur (1999a)	686	936
1973	millan (1999)	138	661
1977	remington (1999)	93	820
1989	dekeyne (1999)	64	345
1992	kasper (1999)	59	436
1994	wolters (1999)	94	300
1999	kuroki (1999)	339	849
2019	poyurovsky (1999a)	50	217
2037	prinssen (1999)	67	433
2039	lawler (1999)	407	693
2040	yamada (1999)	63	342
2042	kapur (1999b)	59	407
2048	gur (1999)	83	482
2054	varty (1999)	127	374
2061	duncan (1999)	77	1586
2068	murphy (1999)	63	231
2073	soares (1999)	80	1489
2074	gründer (1999)	72	270
2081	carlsson (1999a)	230	452
2082	carlsson (1999b)	82	449
2093	lin (1999)	101	453
2098	wirshing (1999)	584	386
2099	tibbo (1999)	143	256
2115	ereshefsky (1999)	99	462
2116	tatsumi (1999)	107	283
2118	truffinet (1999)	101	334
2127	meyer (1999)	159	208
2136	stephenson (1999)	58	627
2144	ichikawa (1999)	127	1780
2156	schultz (1999)	229	318
2160	lewis (1999)	97	850
2161	serretti (1999)	87	225
2165	yu (1999)	118	431
2175	nyberg (1999)	238	560
2184	wadenberg (1999)	177	660
2185	keefe (1999)	643	494
2186	meltzer (1999a)	961	1387
2189	zhang (1999)	157	945
2194	harrison (1999)	1416	659
2201	meltzer (1999b)	658	1104
2204	miller (1999)	152	460
2206	krystal (1999a)	72	1210
2207	krystal (1999b)	95	607
2210	poyurovsky (1999b)	68	281
2225	kapur (2000)	378	925
2227	gijsman (2000)	190	553
2229	hernandez (2000)	53	639
2230	hutson (2000)	74	571
2253	caligiuri (2000)	118	283
2259	tsai (2000)	69	385
2267	richelson (2000)	601	815
2268	thase (2000a)	151	159
2282	chong (2000)	66	824
2300	laruelle (2000)	135	921
2305	svensson (2000)	154	902
2315	glazer (2000)	138	384
2321	lu (2000)	106	321
2326	ho (2000)	93	256
2328	talvik-lotfi (2000)	57	290
2332	millan (2000a)	301	573
2338	herrick-davis (2000)	163	831
2360	carlsson (2000)	179	379
2372	reznik (2000)	62	224
2384	ebstein (2000)	97	216
2388	veenstra-vanderweele (2000)	259	829
2418	akiskal (2000)	756	104
2420	stoltenberg (2000)	88	391
2421	millan (2000b)	216	307
2425	noda (2000)	96	494
2429	mohr (2000)	81	432
2433	bhana (2000)	51	229
2446	okubo (2000)	68	914
2447	aghajanian (2000)	405	1222
2448	serretti (2000)	67	515
2450	hranilovic (2000)	52	339
2453	gobert (2000)	306	635
2482	petronis (2000)	76	388
2486	roth (2000)	291	865
2487	manji (2000)	95	124
2492	moser (2000)	200	610
2506	thase (2000b)	69	114
2519	wȩdzony (2000)	84	602
2529	ichikawa (2001)	488	920
2542	vollenweider (2001)	246	1049
2552	marcotte (2001)	156	1465
2557	allison (2001)	613	565
2567	segman (2001)	148	301
2577	kapur (2001a)	291	1025
2583	wetterling (2001)	231	697
2598	rowley (2001)	140	1493
2600	gefvert (2001)	128	505
2612	kapur (2001b)	1042	1166
2614	kapur (2001c)	327	1677
2617	lavalaye (2001)	79	385
2622	adams (2001)	106	657
2637	schoffelmeer (2001)	66	613
2638	kalkman (2001)	85	1012
2642	silver (2001)	51	562
2646	benes (2001)	906	291
2647	gainetdinov (2001)	184	472
2648	basile (2001a)	214	601
2660	miyamoto (2001)	174	523
2661	lindenmayer (2001)	173	243
2668	serretti (2001a)	171	324
2670	carlsson (2001)	612	570
2672	rauser (2001)	133	786
2674	basile (2001b)	81	327
2675	masellis (2001)	85	718
2679	de paulis (2001)	79	597
2680	pehek (2001)	111	624
2702	yuk lun chen (2001)	58	455
2714	bhana (2001)	62	441
2719	gray (2001)	253	483
2725	pickar (2001)	83	704
2731	geyer (2001)	1341	535
2778	niswender (2001)	219	355
2788	kaiser (2001)	89	297
2799	siris (2001)	299	355
2800	tan (2001)	82	237
2804	bantick (2001)	205	1231
2812	sumiyoshi (2001)	157	803
2823	burns (2001)	166	344
2825	casey (2001)	167	311
2846	poewe (2001)	59	403
2848	serretti (2001b)	53	269
2858	buckley (2001)	115	463
2863	schmidt (2001)	266	304
2869	east (2002a)	85	718
2875	martin (2002)	50	416
2894	leucht (2002)	266	630
2895	east (2002b)	56	744
2911	cusin (2002a)	51	427
2913	ananth (2002)	59	262
2915	seeman (2002)	779	953
2918	burn (2002a)	194	275
2921	tauscher (2002a)	140	606
2926	pralong (2002)	88	450
2936	keck jr. (2002)	88	252
2960	burn (2002b)	87	290
2968	polesskaya (2002)	245	688
2969	chlan-fourney (2002)	121	242
2973	heinz (2002)	225	339
2988	tarsy (2002)	286	1046
2989	sebban (2002)	57	707
2991	pouzet (2002a)	74	481
2992	pouzet (2002b)	76	431
2994	shirazi-southall (2002)	194	717
2995	kumari (2002)	129	282
2996	sajatovic (2002)	83	216
2999	cyr (2002)	140	705
3008	serretti (2002a)	60	497
3022	krystal (2002)	481	471
3025	javitt (2002)	68	545
3040	cusin (2002b)	105	373
3042	spina (2002)	119	169
3043	breese (2002)	66	1557
3044	naguib (2002)	61	392
3050	nocjar (2002)	155	757
3051	tarazi (2002)	94	1104
3056	gorelova (2002)	234	270
3064	umbricht (2002)	207	547
3066	prasad (2002)	55	456
3070	geyer (2002)	259	291
3073	markou (2002)	74	360
3081	frankle (2002)	56	1148
3088	kapur (2002)	377	441
3100	citrome (2002)	91	383
3102	werneke (2002)	88	303
3109	serretti (2002b)	70	683
3110	lerer (2002)	98	318
3126	bowden (2002)	1260	133
3149	nemeroff (2002)	147	436
3156	kasper (2002)	87	567
3163	suppes (2002)	122	180
3170	di matteo (2002)	135	510
3185	serretti (2002c)	89	360
3194	tauscher (2002b)	148	460
3201	day (2002)	77	653
3211	jordan (2002)	523	319
3214	freeman (2002)	261	147
3218	swanson (2002)	56	425
3222	jones (2002)	206	599
3223	gottesmann (2002)	65	330
3227	williams (2002)	264	713
3233	talbot (2002)	108	637
3235	sartorius (2002)	71	1401
3260	thase (2002)	107	261
3263	gunasekara (2002)	70	627
3265	caley (2002)	83	466
3270	bayle (2003)	50	252
3276	nasrallah (2003)	226	429
3289	möller (2003a)	86	635
3291	lindner (2003)	97	350
3300	wieck (2003)	163	277
3306	marder (2003)	462	347
3308	shapiro (2003)	876	1068
3311	keck jr. (2003)	101	387
3320	segman (2003)	53	253
3324	roth (2003)	78	1522
3341	stahl (2003)	133	197
3347	rothschild (2003)	92	105
3348	harvey (2003a)	139	327
3351	malone (2003)	240	161
3354	meltzer (2003a)	127	528
3355	potvin (2003)	62	1066
3357	macqueen (2003)	68	302
3358	sharma (2003)	311	418
3362	poyurovsky (2003a)	63	250
3381	green (2003)	125	624
3403	yamanouchi (2003)	93	258
3407	poyurovsky (2003b)	75	277
3411	rao (2003)	110	426
3414	umbricht (2003)	117	536
3415	kasper (2003)	317	282
3419	halbreich (2003a)	227	288
3424	goodwin (2003)	382	187
3430	ohta (2003)	66	289
3440	wassef (2003)	207	343
3446	inoue (2003)	61	216
3449	laruelle (2003)	391	1399
3450	lorrain (2003)	87	378
3454	halbreich (2003b)	80	369
3464	winstanley (2003)	203	913
3469	bressan (2003)	113	585
3470	fagiolini (2003)	110	168
3474	becker (2003)	260	903
3489	möller (2003b)	112	1279
3506	dean (2003a)	59	408
3509	phillips (2003)	1442	239
3537	lykouras (2003)	157	404
3545	kane (2003)	132	425
3550	lean (2003)	158	389
3578	mcdonald (2003)	314	294
3579	leudtke (2003)	86	291
3624	vaswani (2003)	513	156
3625	harvey (2003b)	177	490
3632	wong (2003)	240	670
3634	sawa (2003)	59	561
3639	juckel (2003)	79	608
3641	czyrak (2003)	79	852
3643	meltzer (2003b)	721	2779
3648	cutler (2003)	171	309
3661	depoortere (2003)	55	432
3682	weiner (2003)	342	667
3683	sakaue (2003)	52	461
3691	dean (2003b)	96	1274
3695	harsing jr. (2003)	105	520
3698	sussman (2003)	58	313
3701	heidbreder (2003)	682	368
3707	farber (2003)	168	381
3731	fernandez (2003)	100	542
3736	miner (2003)	166	721
3737	remington (2003)	81	1537
3761	leysen (2004)	219	1563
3763	woolley (2004)	301	522
3764	thomas (2004)	175	355
3771	mamo (2004)	179	722
3774	knegtering (2004)	117	350
3780	newcomer (2004)	118	402
3791	munro (2004)	92	300
3792	mckeage (2004)	99	465
3795	tsuang (2004)	57	229
3797	castner (2004)	172	1040
3802	haddad (2004)	547	619
3811	deleon (2004)	308	914
3812	davies (2004)	153	1038
3813	harrison (2004)	271	518
3818	lin (2004)	181	232
3819	han (2004)	66	273
3824	ananth (2004)	65	511
3829	shayegan (2004)	86	569
3848	tunbridge (2004)	362	313
3859	fanous (2004)	54	472
3866	reznik (2004)	51	245
3872	meltzer (2004a)	54	1153
3878	yasuno (2004)	103	309
3893	friedel (2004)	106	228
3894	lieberman (2004)	298	1113
3911	gogos (2004)	61	248
3926	serretti (2004a)	52	342
3927	seeman (2004)	170	200
3931	javitt (2004)	465	707
3934	nichols (2004)	1004	672
3940	huang (2004)	148	522
3946	jordan (2004)	126	390
3967	roth (2004a)	1026	863
3978	heinrichs (2004)	97	215
3979	abdolmaleky (2004)	168	362
3999	ukai (2004)	107	421
4000	serretti (2004b)	99	1082
4004	newhouse (2004)	92	345
4005	singh (2004)	52	299
4006	ripoll (2004)	91	412
4015	poyurovsky (2004)	125	581
4027	casey (2004)	154	316
4037	malhotra (2004)	287	1092
4041	barch (2004)	74	320
4049	meltzer (2004b)	315	498
4075	schrag (2004)	191	245
4083	chudasama (2004)	108	776
4090	ketter (2004)	72	255
4098	cheer (2004)	125	328
4104	reynolds (2004)	104	859
4106	preece (2004)	80	591
4115	lane (2004)	58	417
4123	carlsson (2004)	143	559
4124	silver (2004)	57	265
4130	lópez-figueroa (2004)	233	785
4132	sodhi (2004)	278	634
4133	roth (2004b)	227	1122
4134	mendlewicz (2004)	78	217
4136	hranilovic (2004)	212	279
4141	monti (2004)	190	271
4150	boulay (2004)	51	445
4152	lang (2004)	112	177
4162	denys (2004)	54	450
4169	bilder (2004)	639	493
4173	zoccali (2004)	88	410
4182	owen (2004)	280	332
4184	lauterbach (2004)	87	203
4187	serretti (2004c)	66	459
4194	adell (2004)	144	745
4196	grunze (2004)	132	154
4216	stigler (2004)	99	734
4229	matsumoto (2005)	50	390
4230	mitchell (2005)	207	584
4240	spedding (2005)	70	182
4242	fitzsimons (2005)	74	595
4271	möller (2005a)	77	1573
4276	fleischhacker (2005)	86	283
4279	hirose (2005)	70	338
4290	mckeith (2005)	163	216
4307	miller (2005)	149	308
4308	cosi (2005)	61	683
4309	gough (2005)	115	263
4311	kalman (2005)	474	241
4314	wagner (2005)	71	683
4317	lerer (2005)	115	416
4345	marona-lewicka (2005)	100	512
4357	bruins slot (2005)	113	1145
4379	nemeroff (2005)	68	628
4385	abdolmaleky (2005)	120	425
4399	norton (2005)	85	686
4409	rehn (2005)	62	500
4410	díaz-mataix (2005)	267	1039
4429	abi-dargham (2005)	151	2384
4437	du bois (2005)	87	742
4442	lasky-su (2005)	214	232
4444	fan (2005)	51	399
4451	alex (2005)	142	545
4452	puig (2005)	193	703
4463	li (2005)	118	664
4473	roberts (2005)	54	316
4474	torrey (2005)	352	256
4490	kleven (2005)	85	497
4491	newman-tancredi (2005)	131	858
4499	poyurovsky (2005)	103	265
4501	kessler (2005)	79	763
4502	möller (2005b)	52	235
4508	stip (2005)	77	650
4522	lane (2005)	50	813
4524	lesch (2005)	151	299
4525	reynolds (2005a)	124	478
4534	templeman (2005)	258	260
4541	hagan (2005)	99	643
4542	clarke (2005)	291	376
4548	weintraub (2005)	134	245
4553	gouzoulis-mayfrank (2005)	158	632
4560	papapetropoulos (2005)	110	167
4580	moller (2005)	58	613
4586	henderson (2005)	95	514
4595	frankle (2005)	56	380
4602	terranova (2005)	50	310
4609	courtet (2005)	87	225
4615	smid (2005)	61	327
4616	margolese (2005)	125	520
4619	woo (2005)	53	403
4623	bortolozzi (2005)	185	841
4634	craddock (2005)	476	333
4636	serretti (2005)	115	433
4640	breese (2005)	83	487
4646	reynolds (2005b)	123	639
4655	peuskens (2005)	80	561
4661	miyamoto (2005)	819	2064
4672	carter (2005)	148	374
4676	ellingrod (2005)	147	266
4683	hashimoto (2005)	60	497
4688	thompson (2006)	193	148
4698	citrome (2006)	56	318
4710	auclair (2006)	58	847
4732	bardin (2006)	100	626
4745	li (2006)	86	375
4750	farah (2006)	116	799
4763	di giovanni (2006)	66	1475
4808	bruins slot (2006)	65	834
4817	kienast (2006)	146	728
4819	mehta (2006)	72	544
4835	behrendt (2006)	74	279
4844	imre (2006)	58	314
4845	kato (2006)	160	241
4851	kohler (2006)	64	306
4859	pehek (2006)	160	1086
4865	du bois (2006)	60	552
4871	d'souza (2006)	54	563
4872	chudasama (2006)	409	284
4874	rutter (2006)	788	174
4879	müller (2006a)	127	886
4883	jope (2006)	318	437
4921	poyurovsky (2006)	74	415
4926	horacek (2006)	405	1886
4930	holenz (2006)	157	397
4938	hayden (2006)	93	161
4945	winograd-gurvich (2006)	115	302
4947	marx (2006)	141	244
4950	müller (2006b)	51	677
4961	levin (2006)	684	208
5000	murphy (2006)	175	1037
5005	hashimoto (2006a)	52	261
5027	lindsley (2006)	146	537
5070	horstink (2006)	188	216
5073	lane (2006)	132	505
5076	hirst (2006)	206	386
5079	strachan (2006)	64	548
5082	quednow (2006)	92	504
5084	scholtissen (2006)	75	266
5087	hensler (2006)	235	359
5089	frankle (2006)	62	474
5090	bubar (2006)	99	718
5091	ciranna (2006)	230	384
5096	serretti (2006)	203	363
5097	shirzadi (2006)	106	673
5098	hashimoto (2006b)	149	235
5110	tandon (2006)	66	600
5114	xu (2006)	138	250
5138	miklowitz (2006)	130	192
5141	previc (2006)	87	267
5163	de oliveira (2006)	50	1147
5179	centorrino (2006)	72	301
5185	ryu (2007)	70	352
5191	li (2007a)	57	909
5205	benneyworth (2007)	144	379
5211	scholes (2007)	59	284
5214	rojas (2007)	97	372
5221	abi-dargham (2007)	77	2381
5230	paterson (2007)	71	257
5236	güzey (2007)	69	530
5279	lópez-gil (2007)	154	989
5286	ochoa (2007)	58	389
5300	siuciak (2007)	131	874
5314	mamo (2007)	221	590
5319	di pietro (2007)	64	1023
5321	richtand (2007)	112	1058
5323	pangalos (2007)	296	202
5329	sumiyoshi (2007)	134	1082
5347	depoortère (2007)	58	626
5355	catapano (2007)	98	378
5368	agid (2007)	198	296
5370	serretti (2007a)	136	765
5371	serretti (2007b)	82	262
5378	bortolozzi (2007)	96	1186
5383	stark (2007)	133	523
5404	ishiyama (2007)	148	450
5421	tschoner (2007)	208	368
5422	récasens (2007)	52	372
5431	gray (2007)	191	1044
5450	newman-tancredi (2007)	64	1379
5464	levin (2007)	110	367
5481	reimold (2007)	52	799
5489	ross (2007)	239	185
5510	zipursky (2007)	71	639
5511	kumar (2007)	52	354
5513	arranz (2007)	303	809
5519	alex (2007)	506	1282
5521	la torre (2007)	210	426
5524	buckley (2007)	131	568
5526	lameh (2007)	92	762
5529	mouri (2007)	229	576
5530	hashimoto (2007)	134	321
5550	carter (2007)	92	408
5568	de almeida (2007)	77	1041
5569	riedel (2007)	55	594
5577	li (2007b)	170	319
5585	gu (2007)	60	526
5597	sepehry (2007)	86	413
5607	gunes (2007)	57	509
5613	mccreary (2007)	60	1113
5647	vollenweider (2007)	127	566
5675	schmidt (2007)	571	147
5687	apud (2007)	85	748
5702	marquis (2007)	139	389
5717	drago (2008)	51	389
5719	hurlemann (2008)	81	466
5728	müller (2008a)	110	592
5748	remington (2008)	66	1703
5750	natesan (2008)	58	642
5759	lieberman (2008)	196	745
5760	rege (2008)	65	457
5768	pae (2008)	77	786
5771	huang (2008)	50	1229
5782	nasrallah (2008)	453	561
5783	chouinard (2008)	134	400
5789	siuciak (2008)	100	282
5791	fone (2008)	702	369
5806	müiller-vahl (2008)	99	204
5825	spina (2008)	300	122
5830	terry jr. (2008)	105	664
5838	erritzoe (2008)	56	936
5840	müller (2008b)	97	651
5859	de almeida (2008a)	61	1438
5862	meltzer (2008a)	154	910
5865	gainetdinov (2008)	67	246
5883	krystal (2008)	90	334
5884	nordquist (2008)	59	600
5905	berg (2008)	81	772
5911	mcguire (2008)	122	641
5912	gunes (2008)	54	338
5936	johnson (2008)	627	267
5947	snigdha (2008)	77	304
5951	meltzer (2008b)	211	2282
5952	semenova (2008)	51	341
5957	dracheva (2008)	75	232
5984	truong (2008)	90	295
5998	haddley (2008)	55	367
6005	ujike (2008)	84	392
6012	newberg (2008)	50	149
6018	haddad (2008)	162	193
6019	chan (2008)	168	202
6021	kuroki (2008)	123	2033
6030	simuni (2008)	196	177
6036	conn (2008a)	70	393
6049	zahodne (2008)	183	416
6053	pearlstein (2008)	99	48
6060	arranz (2008)	84	590
6066	baptista (2008)	108	433
6073	thase (2008)	61	186
6076	hagiwara (2008)	61	614
6079	abbas (2008)	74	753
6097	montejo (2008)	69	273
6112	van winkel (2008)	378	361
6131	rodefer (2008)	118	601
6136	werry (2008)	136	581
6146	conn (2008b)	84	344
6152	boulougouris (2008)	60	785
6155	de almeida (2008b)	55	665
6160	di matteo (2008)	135	1299
6161	adams (2008)	57	804
6162	geyer (2008)	328	506
6181	fowler (2008)	112	230
6186	wang (2008)	62	327
6195	celada (2008)	90	959
6202	passie (2008)	317	322
6204	monti (2008)	218	462
6214	ziedonis (2008)	581	206
6248	liu (2009)	80	627
6255	lieberman (2009)	138	319
6264	gonzález-maeso (2009a)	65	1066
6266	beaulieu (2009)	454	462
6286	nagai (2009)	130	1051
6292	shahid (2009)	291	457
6297	gunes (2009)	74	305
6313	kim (2009)	74	682
6333	malhi (2009a)	114	160
6334	malhi (2009b)	89	121
6336	gray (2009)	114	274
6351	stone (2009)	54	576
6355	aloyo (2009)	105	1059
6391	stephan (2009)	890	583
6400	yamamura (2009)	60	419
6407	rakofsky (2009)	68	180
6410	roth (2009)	127	376
6423	drago (2009)	54	452
6426	corlett (2009)	229	721
6439	moreno (2009)	57	507
6442	winter (2009a)	52	654
6448	starrenburg (2009)	76	286
6463	nikolaus (2009)	116	399
6465	meyer (2009a)	288	430
6481	meyer (2009b)	119	276
6487	miller (2009)	50	874
6513	meyer (2009c)	130	990
6522	jocham (2009)	143	330
6525	henriquez (2009)	154	277
6538	holt (2009)	111	666
6541	mukhopadhaya (2009)	58	363
6543	lysaker (2009)	63	346
6545	godlewska (2009)	51	355
6548	filip (2009)	155	403
6571	winter (2009b)	199	367
6572	powell (2009)	173	755
6576	gonzález-maeso (2009b)	140	948
6594	vázquez-borsetti (2009)	85	972
6604	mclean (2009)	65	1499
6605	fernandez-espejo (2009)	126	489
6620	fox (2009)	143	633
6622	iwamoto (2009)	55	315
6625	hashimoto (2009)	104	244
6642	gründer (2009)	115	989
6645	hedlund (2009)	210	441
6648	dutt (2009)	61	176
6655	müller (2009)	71	310
6670	geldenhuys (2009)	70	368
6709	rossé (2010)	74	726
6746	young (2010)	79	764
6770	opgen-rhein (2010)	72	277
6772	snigdha (2010)	83	682
6786	wood (2010)	58	185
6797	wadenberg (2010)	72	1387
6799	müller (2010)	124	654
6801	gururajan (2010)	50	806
6802	rasmussen (2010)	102	930
6819	bortolozzi (2010)	73	1292
6842	bagot (2010)	124	119
6872	demichele-sweet (2010)	55	286
6874	marek (2010)	136	855
6877	chaki (2010)	56	706
6888	madhusoodanan (2010)	116	514
6893	scharinger (2010)	75	174
6896	willeit (2010)	77	634
6917	bitanihirwe (2010)	191	352
6923	arnt (2010)	105	533
6926	ballard (2010)	115	48
6930	nikiforuk (2010)	66	326
6937	reynolds (2010)	338	687
6953	francis (2010)	93	192
6967	ohno (2010)	52	503
6986	canuso (2010)	50	238
7000	laika (2010)	90	370
7014	meltzer (2010)	243	602
7016	sicard (2010)	95	523
7017	zink (2010)	121	210
7019	patel (2010)	58	1041
7021	coccurello (2010)	113	445
7024	lladó-pelfort (2010)	94	734
7061	di giovanni (2010)	99	1353
7077	puig (2010)	157	561
7084	idris (2010)	75	547
7107	rajkumar (2010)	103	266
7109	fleeman (2010)	60	293
7118	parolaro (2010)	117	183
7120	newman-tancredi (2010)	136	767
7127	artigas (2010)	52	1220
7141	jensen (2010)	67	653
7146	mailman (2010)	252	898
7172	winterer (2010)	198	227
7208	jones (2011)	580	482
7210	meyer (2011)	61	250
7214	correll (2011)	246	231
7218	schirmbeck (2011)	85	396
7238	roerig (2011)	135	645
7245	newman-tancredi (2011a)	81	546
7251	zayara (2011)	55	411
7275	lesh (2011)	386	500
7281	newman-tancredi (2011b)	148	1036
7295	fribourg (2011)	243	478
7298	ortega-alvaro (2011)	166	212
7325	wallace (2011)	119	452
7326	paparelli (2011)	62	874
7339	carli (2011)	52	1117
7348	marco (2011)	113	178
7351	guidotti (2011)	180	203
7356	barnes (2011)	324	263
7367	albizu (2011)	95	485
7375	chowdhury (2011)	56	463
7389	achim (2011)	375	271
7393	ghadirivasfi (2011)	102	202
7402	darvesh (2011)	64	486
7406	marsden (2011)	70	285
7409	horiguchi (2011)	59	922
7429	kasckow (2011)	107	229
7433	moreno (2011)	97	425
7450	caroff (2011)	134	742
7451	halberstadt (2011)	250	443
7456	blier (2011)	55	427
7466	neto (2011)	126	166
7476	pallanti (2011)	105	374
7480	nielsen (2011)	127	363
7486	soronen (2011)	79	213
7488	weintraub (2011)	280	323
7498	zhang (2011)	160	865
7500	arranz (2011)	81	590
7505	floresco (2011)	83	468
7513	de hert (2011)	1700	318
7515	mcfarland (2011)	56	470
7562	matthys (2011)	133	444
7570	ebdrup (2011)	70	1814
7591	field (2011)	93	504
7594	kometer (2011)	52	347
7610	seppi (2011)	692	242
7616	bennett (2011)	69	679
7617	yadav (2011)	59	1062
7624	hashimoto (2011)	129	354
7625	meltzer (2011a)	106	1922
7626	meltzer (2011b)	294	1292
7628	huot (2011)	148	723
7631	goff (2011)	143	867
7636	ohno (2011)	95	767
7667	lladó-pelfort (2012)	132	857
7684	wing (2012)	85	446
7685	beaulieu (2012)	189	311
7692	pratt (2012)	128	747
7717	croxtall (2012)	65	453
7746	kanner (2012)	109	106
7761	vehof (2012)	51	357
7765	fakra (2012)	67	485
7768	schirmbeck (2012)	91	634
7777	fornito (2012)	88	187
7792	long (2012)	74	197
7796	tanahashi (2012)	50	533
7815	piontkewitz (2012)	81	242
7817	waters (2012)	52	374
7838	jun (2012)	86	137
7848	kurita (2012)	231	424
7861	moreno (2012)	112	331
7874	adell (2012)	114	407
7898	schmidt (2012)	83	489
7908	campos (2012)	320	192
7948	malhotra (2012)	67	365
7949	lett (2012)	208	698
7960	meltzer (2012a)	79	1161
7976	quednow (2012)	141	558
7988	gallagher (2012)	175	220
7998	sanford (2012)	65	191
8007	santos (2012)	60	351
8009	hyman (2012)	196	235
8019	meltzer (2012b)	86	1561
8024	meltzer (2012c)	95	2305
8033	lyon (2012)	90	687
8035	jafari (2012)	58	983
8046	teo (2012)	103	323
8066	schlaepfer (2012)	54	145
8082	horiguchi (2012)	80	1118
8085	rodríguez (2012)	213	340
8114	mestre (2013)	52	849
8137	choi (2013)	79	344
8144	hanks (2013)	115	518
8197	scarr (2013)	78	677
8215	schirmbeck (2013)	71	671
8249	boules (2013)	93	463
8254	leggio (2013)	117	292
8261	muguruza (2013)	63	658
8269	nikiforuk (2013)	86	379
8339	meltzer (2013a)	87	838
8346	gilmour (2013)	57	269
8362	smith (2013)	58	239
8365	sumiyoshi (2013)	62	409
8375	kato (2013)	65	247
8402	ozomaro (2013)	184	178
8422	narayanan (2013)	138	287
8425	holloway (2013)	103	326
8471	weston-green (2013)	75	231
8473	halberstadt (2013)	52	996
8475	celada (2013a)	240	1250
8477	celada (2013b)	281	1064
8481	de bartolomeis (2013)	80	908
8484	wu (2013)	77	219
8520	arnsten (2013)	67	456
8532	huot (2013)	57	467
8536	delille (2013)	60	1147
8545	meltzer (2013b)	98	1816
8558	meltzer (2013c)	320	1087
8569	murray (2013)	55	666
8574	cerovecki (2013)	82	384
8603	neill (2014)	97	498
8610	selvaraj (2014)	152	1364
8612	dandash (2014)	136	301
8629	tait (2014)	53	430
8639	maeda (2014)	108	409
8655	seeman (2014)	78	764
8702	uher (2014)	201	141
8716	steiner (2014)	66	199
8717	schreiber (2014)	70	770
8749	ballon (2014)	89	225
8750	fuxe (2014)	88	422
8780	brandl (2014)	71	762
8786	rolland (2014)	63	628
8796	piel (2014)	120	413
8816	zajdel (2014)	71	767
8822	hyman (2014)	72	421
8829	howes (2014)	580	341
8834	fonseka (2014)	57	641
8855	schumann (2014)	152	204
8879	carhart-harris (2014)	605	311
8886	turecki (2014)	187	69
8888	rajagopal (2014)	124	919
8892	brisch (2014)	348	485
8893	jiménez-sánchez (2014)	60	291
8898	carbon (2014)	143	407
8907	connolly (2014)	59	262
8908	goldman (2014)	92	224
8913	nousen (2014)	86	193
8922	freedman (2014)	139	319
8927	de bruin (2015)	61	354
8937	brand (2015)	70	238
8938	gogos (2015)	141	290
8953	temmingh (2015)	108	276
8991	tsapakis (2015)	52	745
9018	steeds (2015)	108	1073
9044	snyder (2015)	86	1007
9077	millan (2015)	105	284
9105	galderisi (2015)	83	345
9111	ohno (2015)	59	577
9159	kusumi (2015)	129	1380
9160	tatard-leitman (2015)	82	431
9163	halberstadt (2015)	210	573
9216	reisinger (2015)	168	246
9222	zhang (2015)	210	535
9225	pratt (2015)	61	269
9236	de bartolomeis (2015)	133	866
9240	jones (2015)	54	232
9252	chagraoui (2016)	83	961
9278	orsolini (2016)	105	350
9283	fang (2016)	54	453
9304	rohleder (2016)	73	210
9324	de gregorio (2016)	79	1155
9346	lee (2016)	60	355
9348	caroff (2016)	60	682
9424	landek-salgado (2016)	67	1145
9433	carbonaro (2016)	123	369
9437	di giovanni (2016)	92	580
9455	zhang (2016)	133	527
9478	barre (2016)	79	387
9484	nichols (2016)	891	548
9529	aznar (2016)	57	329
9532	citrome (2016)	50	264
9547	carhart-harris (2016)	203	315
9555	štrac (2016)	162	545
9559	pei (2016)	100	318
9563	elkis (2016)	122	726
9564	lally (2016)	100	627
9595	palacios (2017)	69	416
9610	chouinard (2017)	172	566
9613	tuplin (2017)	58	1101
9639	casey (2017)	75	1282
9645	nucifora (2017)	116	769
9736	santana (2017)	79	431
9778	yang (2017)	175	471
9805	campos (2017)	110	176
9812	de veen (2017)	50	235
9832	manchia (2017)	61	184
9866	waltz (2017)	72	355
9875	maletic (2017)	100	253
9890	veerman (2017)	60	255
9892	aleman (2017)	131	212
9896	borroto-escuela (2017)	105	373
9940	mohammadi (2018)	80	928
9953	chopko (2018)	64	269
9980	amato (2018)	61	1366
10001	assary (2018)	125	162
10007	lópez-giménez (2018)	126	783
10048	aringhieri (2018)	123	697
10051	kondej (2018)	60	597
10072	cadinu (2018)	105	338
10103	girotti (2018)	80	328
10143	carbon (2018)	116	285
10168	bogenschutz (2018)	61	223
10211	winship (2019)	135	305
10300	uno (2019)	208	499
10397	dedic (2019)	110	416
10398	chakraborty (2019)	64	207
10425	girgis (2019)	51	353
10475	kaar (2020)	165	917
10494	adell (2020)	113	846
10736	potkin (2020)	158	399
11100	kokkinou (2021)	53	339

## Sheet: Journals
id	source	documents	citations	total link strength
2	aaps journal	3	379	5
3	aaps pharmsci	2	71	9
4	academic emergency medicine	1	58	5
5	academic pediatrics	1	21	2
7	acs chemical neuroscience	25	727	167
8	acs medicinal chemistry letters	3	51	2
11	acta biologica szegediensis	1	22	2
16	acta dermato-venereologica	1	57	3
20	acta gastro-enterologica belgica	1	19	3
24	acta medica iranica	1	2	7
28	acta neurologica belgica	5	42	4
29	acta neurologica scandinavica	1	470	15
32	acta neuropsychiatrica	28	283	103
35	acta pharmaceutica	2	23	4
36	acta pharmaceutica sinica b	1	26	2
37	acta pharmacologica sinica	1	20	5
39	acta physiologica hungarica	1	9	6
43	acta psychiatrica scandinavica	77	4061	265
44	acta psychiatrica scandinavica, supplement	3	119	2
46	acta vitaminologica et enzymologica	1	9	4
47	actas espanolas de psiquiatria	2	8	5
48	activitas nervosa superior	6	28	5
51	addiction	5	697	12
52	addiction biology	5	86	7
53	addictive behaviors	3	313	2
55	adicciones	1	1	5
56	advanced pharmaceutical bulletin	2	38	4
57	advanced studies in medicine	3	15	4
61	advances in clinical and experimental medicine	2	5	2
64	advances in experimental medicine and biology	17	280	36
65	advances in neurobiology	6	31	13
66	advances in neurology	3	86	8
67	advances in pharmacology	2	80	7
69	advances in psychiatric treatment	36	849	45
72	advances in therapy	5	105	69
77	african journal of psychiatry (south africa)	4	156	3
79	ageing research reviews	3	46	4
81	aging and disease	1	5	2
82	aging clinical and experimental research	4	44	2
83	aging health	7	68	16
87	aip conference proceedings	1	1	2
90	alcohol and alcoholism	3	234	2
92	alcoholism: clinical and experimental research	3	371	3
96	alzheimer's and dementia	2	730	2
97	alzheimer's research and therapy	2	137	7
98	american family physician	11	404	9
99	american journal geriatric pharmacotherapy	6	342	11
104	american journal of clinical dermatology	3	375	2
108	american journal of geriatric psychiatry	18	787	48
109	american journal of health-system pharmacy	14	414	11
110	american journal of managed care	3	114	4
112	american journal of medical genetics - neuropsychiatric genetics	51	2860	383
113	american journal of medical genetics - seminars in medical genetics	9	483	117
114	american journal of medical genetics, part b: neuropsychiatric genetics	29	1000	209
115	american journal of medical genetics, part c: seminars in medical genetics	1	132	2
119	american journal of obstetrics and gynecology	5	629	8
121	american journal of pharmacogenomics	1	120	7
125	american journal of psychiatry	154	15522	1435
127	american journal of therapeutics	3	22	2
128	american journal of translational research	2	10	7
129	american journal on addictions	5	643	7
132	amino acids	2	7	20
136	analytical biochemistry	2	148	4
137	anatomy and embryology	1	40	32
141	angiology	1	17	2
143	annales d'endocrinologie	1	1	2
145	annales medico-psychologiques	2	0	8
147	annals of biomedical engineering	1	19	3
148	annals of cardiothoracic surgery	1	3	4
151	annals of clinical psychiatry	27	779	65
152	annals of emergency medicine	2	165	2
153	annals of general hospital psychiatry	1	21	2
154	annals of general psychiatry	5	260	6
156	annals of human genetics	1	22	3
157	annals of indian academy of neurology	3	299	5
159	annals of internal medicine	4	45	4
160	annals of long-term care	6	14	6
161	annals of medicine	6	272	46
163	annals of movement disorders	1	0	8
165	annals of nuclear medicine	1	56	19
167	annals of pharmacotherapy	28	1013	77
170	annals of the new york academy of sciences	27	2605	98
172	annual review of biomedical engineering	1	47	2
173	annual review of clinical psychology	6	429	7
175	annual review of medicine	7	1230	74
176	annual review of neuroscience	3	3093	22
177	annual review of pharmacology and toxicology	5	2227	106
180	anxiety disorders	1	1	16
185	archives of general psychiatry	56	5299	521
186	archives of gerontology and geriatrics	2	6	3
187	archives of gynecology and obstetrics	2	68	3
190	archives of medical research	2	23	11
191	archives of neurology	4	735	26
193	archives of pediatrics and adolescent medicine	4	502	4
196	archives of psychiatry and psychotherapy	6	19	18
197	archives of psychiatry research	6	6	5
198	archives of sexual behavior	1	39	3
200	archives of women's mental health	6	208	19
202	arquivos de neuro-psiquiatria	7	89	18
204	arzneimittel-forschung/drug research	7	143	17
205	asia-pacific psychiatry	3	23	23
206	asian journal of pharmaceutical and clinical research	3	1	2
207	asian journal of psychiatry	16	138	62
209	assay and drug development technologies	1	7	3
211	atlas of genetics and cytogenetics in oncology and haematology	2	0	2
212	australasian psychiatry	22	244	15
213	australian and new zealand journal of psychiatry	78	2467	95
218	australian prescriber	8	130	3
228	basic and clinical pharmacology and toxicology	2	94	5
229	behavior genetics	1	20	30
230	behavioral and brain functions	5	178	18
231	behavioral and brain sciences	9	401	15
234	behavioral sciences	1	5	4
235	behavioral sciences and the law	1	15	3
237	behavioural brain research	61	2478	494
238	behavioural neurology	2	90	2
239	behavioural pharmacology	35	1710	342
243	bioactive heterocyclic compound classes: pharmaceuticals	1	0	7
244	biochemia medica	1	0	3
245	biochemical and biophysical research communications	2	87	62
246	biochemical journal	2	356	6
247	biochemical pharmacology	17	1099	41
250	biochimica et biophysica acta - biomembranes	2	239	8
251	biochimica et biophysica acta - general subjects	2	141	12
254	biogenic amines	4	12	5
255	biogerontology	1	98	9
256	biological and pharmaceutical bulletin	2	22	9
257	biological psychiatry	187	15870	1216
259	biological psychiatry: cognitive neuroscience and neuroimaging	6	95	4
260	biological psychology	2	434	9
262	biology of the cell	2	33	6
265	biomed research international	5	154	25
271	biomedicines	5	17	24
272	biomolecules	14	348	66
273	bioorganic and medicinal chemistry	12	341	27
274	bioorganic and medicinal chemistry letters	35	780	43
275	bioorganic chemistry	1	11	2
276	bioscience reports	1	44	6
279	biotechnology journal	1	13	7
280	bipolar disorders	17	1754	33
281	bipolar disorders, supplement	4	169	11
282	bj psych advances	3	21	6
283	bjpsych advances	10	53	16
284	bjpsych bulletin	2	39	2
287	bmb reports	1	18	3
290	bmc genetics	3	99	11
293	bmc medical genetics	2	20	4
294	bmc medicine	6	438	9
299	bmc psychiatry	27	681	60
300	bmj	4	32	10
301	bmj (online)	8	1797	7
302	bmj case reports	4	18	4
303	bmj open	4	180	5
306	brain	3	2160	10
307	brain and behavior	6	38	9
312	brain protection in schizophrenia, mood and cognitive disorders	1	3	2
313	brain research	35	4694	307
314	brain research bulletin	17	1575	118
315	brain research reviews	12	2035	67
316	brain sciences	25	324	29
318	brain structure and function	1	7	7
319	brain, behavior, and immunity	7	227	23
323	briefings in functional genomics and proteomics	1	29	5
325	british dental journal	2	26	2
326	british journal of addiction	1	42	2
328	british journal of clinical pharmacology	25	512	68
331	british journal of general practice	4	59	4
335	british journal of pharmacology	29	2293	243
336	british journal of psychiatry	75	4251	365
338	british medical bulletin	5	963	12
339	british medical journal	13	761	7
340	bulletin of experimental biology and medicine	2	7	3
343	bulletin of the menninger clinic	6	84	6
345	canadian family physician	5	117	8
347	canadian journal of diabetes	3	43	2
350	canadian journal of hospital pharmacy	2	1	2
351	canadian journal of neurological sciences	4	47	5
353	canadian journal of physiology and pharmacology	2	10	13
354	canadian journal of psychiatry	58	3164	230
363	cancer journal	1	104	1
364	cancer letters	2	74	2
375	cell	5	563	66
377	cell and bioscience	1	0	7
378	cell and tissue biology	1	2	8
379	cell reports	1	71	2
380	cells	15	190	24
381	cellular and molecular life sciences	6	735	12
382	cellular and molecular neurobiology	9	879	28
384	central nervous system agents in medicinal chemistry	8	232	41
385	cephalalgia	1	15	2
387	cerebral cortex	9	544	48
388	chemical and pharmaceutical bulletin	3	28	4
390	chemmedchem	6	64	22
393	child and adolescent psychiatric clinics of north america	30	661	39
397	chinese journal of clinical rehabilitation	4	2	10
403	circulation journal	1	67	6
406	clinical and developmental immunology	1	24	4
409	clinical and experimental pharmacology and physiology	5	380	44
413	clinical chemistry and laboratory medicine	1	27	13
414	clinical child and family psychology review	1	50	4
416	clinical drug investigation	7	146	35
417	clinical eeg and neuroscience	4	102	3
419	clinical genetics	2	39	1
422	clinical interventions in aging	1	109	10
425	clinical medicine insights: therapeutics	2	5	5
427	clinical microbiology reviews	1	203	2
429	clinical neuropharmacology	43	1112	197
430	clinical neurophysiology	6	1472	26
431	clinical neuropsychiatry	10	17	7
432	clinical neuropsychologist	2	57	4
434	clinical neuroscience (new york, n.y.)	1	169	50
435	clinical neuroscience research	6	162	36
442	clinical pharmacokinetics	4	318	13
443	clinical pharmacology and therapeutics	8	499	14
447	clinical practice	1	3	3
452	clinical psychopharmacology and neuroscience	20	396	81
454	clinical schizophrenia and related psychoses	9	147	52
455	clinical therapeutics	12	1218	80
456	clinical toxicology	1	7	5
458	clinics in dermatology	5	55	4
460	clinics in geriatric medicine	11	215	9
461	clinics in laboratory medicine	7	63	40
462	clinics in perinatology	1	24	3
465	cmaj. canadian medical association journal	5	75	7
467	cns and neurological disorders - drug targets	37	1005	124
468	cns drug reviews	20	618	112
469	cns drugs	106	7822	714
470	cns neuroscience and therapeutics	13	748	87
471	cns spectrums	84	2176	207
472	cochrane database of systematic reviews	10	583	10
475	cognitive and behavioral neurology	3	36	4
476	cognitive and behavioral practice	1	2	5
477	cognitive neuropsychiatry	4	161	2
484	complementary therapies in medicine	1	21	2
485	comprehensive psychiatry	17	597	8
488	consciousness and cognition	2	103	5
490	consultant pharmacist	4	28	2
491	continuum lifelong learning in neurology	10	193	3
492	core evidence	2	41	6
497	cpt: pharmacometrics and systems pharmacology	2	58	5
498	criminal behaviour and mental health	2	11	3
501	critical care clinics	9	559	4
504	critical reviews in biomedical engineering	1	34	2
506	critical reviews in neurobiology	5	262	12
507	critical reviews in oncology/hematology	2	73	2
509	croatian medical journal	2	38	2
510	current alzheimer research	4	65	21
512	current behavioral neuroscience reports	1	0	15
513	current bioactive compounds	1	14	6
515	current clinical pharmacology	2	10	1
516	current computer-aided drug design	3	25	2
517	current diabetes reports	2	119	5
518	current drug abuse reviews	4	107	7
519	current drug delivery	2	9	2
521	current drug discovery technologies	2	8	4
522	current drug metabolism	5	215	10
523	current drug safety	7	228	34
524	current drug targets	19	989	103
525	current drug targets: cns and neurological disorders	8	919	71
526	current drug therapy	3	16	20
527	current gastroenterology reports	1	14	2
529	current genomics	4	110	11
533	current hypertension reports	2	20	2
536	current issues in molecular biology	4	13	4
537	current medical imaging reviews	1	0	2
538	current medical research and opinion	13	367	45
539	current medicinal chemistry	37	1983	279
540	current medicinal chemistry - central nervous system agents	6	100	24
541	current molecular medicine	8	151	38
542	current molecular pharmacology	3	58	2
543	current neurobiology	1	2	2
544	current neurology and neuroscience reports	12	322	13
545	current neuropharmacology	44	1719	216
551	current opinion in central and peripheral nervous system investigational drugs	3	37	8
554	current opinion in drug discovery and development	1	46	5
556	current opinion in genetics and development	3	116	4
557	current opinion in investigational drugs	21	816	241
558	current opinion in molecular therapeutics	1	16	9
559	current opinion in neurobiology	5	349	9
560	current opinion in neurology	6	384	34
562	current opinion in obstetrics and gynecology	2	53	2
566	current opinion in pharmacology	14	825	138
567	current opinion in psychiatry	70	2027	179
571	current pharmaceutical biotechnology	6	234	77
572	current pharmaceutical design	59	3015	327
573	current pharmacogenomics	3	6	32
574	current pharmacogenomics and personalized medicine	4	17	27
575	current pharmacology reports	3	30	10
576	current problems in obstetrics, gynecology and fertility	1	5	3
577	current problems in pediatric and adolescent health care	1	7	2
578	current protein and peptide science	2	22	3
580	current protocols in pharmacology	1	60	2
581	current psychiatry	33	40	13
582	current psychiatry reports	62	1796	115
584	current psychiatry reviews	24	164	80
586	current psychosis and therapeutics reports	3	13	19
587	current reviews in clinical and experimental pharmacology	2	1	10
590	current therapeutic research - clinical and experimental	2	14	2
593	current topics in behavioral neurosciences	44	1143	114
594	current topics in medicinal chemistry	22	890	109
595	current topics in pharmacology	1	2	8
597	current treatment options in neurology	15	279	8
599	current treatment options in psychiatry	2	16	3
604	danish medical bulletin	1	210	5
606	dementia and geriatric cognitive disorders	4	147	18
607	depression and anxiety	13	426	4
609	dermatologic therapy	2	40	4
613	developmental medicine and child neurology	4	42	7
614	developmental neurobiology	3	174	6
616	developmental neuroscience	4	140	9
618	diabetes care	1	158	2
620	diabetes, obesity and metabolism	2	200	9
623	dialogues in clinical neuroscience	31	1348	86
625	disease markers	2	130	4
626	disease of the nervous system	7	47	3
629	dna and cell biology	1	21	11
630	drug and alcohol dependence	10	750	21
633	drug benefit trends	11	5	4
635	drug delivery letters	1	1	2
638	drug design, development and therapy	6	151	25
641	drug development research	16	518	125
642	drug discovery today	15	1222	52
643	drug discovery today: therapeutic strategies	10	103	29
645	drug metabolism and drug interactions	2	47	8
646	drug metabolism and pharmacokinetics	1	32	5
647	drug metabolism reviews	3	73	7
648	drug news and perspectives	9	242	20
649	drug safety	25	2014	84
650	drug testing and analysis	2	153	18
653	drug, healthcare and patient safety	2	55	11
654	drugs	25	2596	112
655	drugs and aging	16	849	66
656	drugs and therapy perspectives	5	5	7
657	drugs in context	2	18	2
659	drugs of the future	35	280	60
660	drugs of today	27	392	79
661	dusunen adam - the journal of psychiatry and neurological sciences	3	0	4
663	early intervention in psychiatry	10	191	4
664	east asian archives of psychiatry	3	92	6
668	economics of neuroscience	7	10	3
673	elife	2	23	2
675	embo molecular medicine	2	153	16
677	emergency medicine clinics of north america	7	124	8
678	emerging drugs	1	21	4
682	encyclopedia of behavioral neuroscience: volumes 1-3, second edition	2	0	7
686	encyclopedia of neuroscience	3	11	2
689	endocrine, metabolic and immune disorders - drug targets	2	102	19
691	endocrinology and metabolism clinics of north america	1	198	1
692	eneuro	2	20	6
695	environmental toxicology and pharmacology	1	7	6
697	epidemiology and psychiatric sciences	5	93	4
699	epigenomics	3	80	12
700	epilepsia	10	1674	18
701	epilepsy and behavior	20	1161	23
703	epma journal	1	27	2
704	essays in biochemistry	1	4	5
705	essays in neurochemistry and neuropharmacology	1	97	2
707	ethical human psychology and psychiatry	8	79	4
708	ethical human sciences and services	4	28	6
710	european archives of psychiatry and clinical neuroscience	46	1636	157
712	european child and adolescent psychiatry	21	544	30
718	european journal of clinical pharmacology	15	390	50
722	european journal of human genetics	3	575	35
723	european journal of medical research	1	26	4
724	european journal of medicinal chemistry	14	366	70
725	european journal of neurology	7	827	25
726	european journal of neuroscience	10	397	80
727	european journal of nuclear medicine	3	116	10
729	european journal of paediatric neurology	1	0	2
731	european journal of pediatrics	3	79	1
733	european journal of pharmacology	56	4475	614
734	european journal of psychiatry	8	26	12
735	european neurology	2	48	3
736	european neuropsychopharmacology	100	4183	639
738	european psychiatry	47	1800	188
739	european review for medical and pharmacological sciences	5	56	15
742	experientia	5	178	12
744	experimental and clinical psychopharmacology	2	2	9
745	experimental and molecular medicine	1	8	6
746	experimental brain research	5	130	39
747	experimental neurology	4	200	13
750	expert opinion on drug discovery	15	329	90
751	expert opinion on drug metabolism and toxicology	9	385	85
752	expert opinion on drug safety	22	983	99
753	expert opinion on emerging drugs	10	334	51
754	expert opinion on investigational drugs	39	1099	247
755	expert opinion on pharmacotherapy	69	1811	344
756	expert opinion on therapeutic patents	34	538	60
757	expert opinion on therapeutic targets	13	500	38
760	expert review of clinical pharmacology	13	123	80
761	expert review of dermatology	2	13	2
763	expert review of neurotherapeutics	66	1812	201
764	expert review of obstetrics and gynecology	2	54	2
765	expert review of pharmacoeconomics and outcomes research	3	64	3
773	farmacia	3	46	5
774	faseb journal	3	405	7
776	febs letters	2	42	6
784	formulary	3	19	7
785	fortschritte der neurologie psychiatrie	1	4	2
787	free radical biology and medicine	1	12	4
788	frontiers in aging neuroscience	2	18	6
789	frontiers in behavioral neuroscience	12	428	34
791	frontiers in bioscience - scholar	1	10	2
792	frontiers in cell and developmental biology	1	4	5
793	frontiers in cellular neuroscience	19	436	47
794	frontiers in endocrinology	6	170	13
795	frontiers in genetics	2	26	5
796	frontiers in human neuroscience	8	1197	7
797	frontiers in immunology	9	297	3
798	frontiers in integrative neuroscience	6	329	15
800	frontiers in molecular neuroscience	15	209	10
802	frontiers in neuroanatomy	2	157	8
805	frontiers in neuroscience	21	924	39
807	frontiers in pediatrics	2	7	2
808	frontiers in pharmacology	43	1482	146
809	frontiers in psychiatry	60	1622	187
811	frontiers in synaptic neuroscience	4	318	4
814	fukushima journal of medical sciences	1	4	2
815	fundamental and clinical pharmacology	5	389	65
816	fundamentals of consultation liaison psychiatry: neuropsychiatry	3	2	2
817	future medicinal chemistry	5	137	33
818	future neurology	10	68	17
819	future oncology	1	23	2
824	gene	3	145	21
825	gene reports	1	0	2
826	general hospital psychiatry	26	929	33
827	general pharmacology	2	13	2
828	genes	7	69	38
829	genes, brain and behavior	5	202	29
830	genetic testing	2	65	22
831	genetic testing and molecular biomarkers	1	8	5
832	genetics and molecular research	2	32	12
833	genetics in medicine	3	989	2
836	geriatrics and aging	3	1	7
838	german journal of psychiatry	6	34	7
839	gerontology	1	30	7
846	glia	3	157	6
851	handbook of behavioral neuroscience	8	62	144
852	handbook of clinical neurology	1	17	4
853	handbook of experimental pharmacology	14	403	103
855	harvard review of psychiatry	34	1273	105
857	health economics	3	51	2
860	health technology assessment	4	225	7
868	hippocampus	4	216	8
870	hiv/aids - research and palliative care	1	127	3
875	hong kong practitioner	2	0	2
879	hospital medicine	1	5	3
883	hospital pharmacy	14	10	3
884	human and experimental toxicology	2	5	3
886	human genetics	5	375	92
887	human heredity	4	168	67
888	human molecular genetics	2	132	5
889	human mutation	4	165	38
891	human psychopharmacology	51	1755	208
892	human psychopharmacology: clinical and experimental	7	95	31
893	ibro neuroscience reports	2	14	3
895	idrugs	35	84	10
899	in vivo	4	156	9
901	indian journal of clinical biochemistry	2	335	17
903	indian journal of forensic medicine and toxicology	2	0	3
904	indian journal of medical research	14	211	23
908	indian journal of pharmacology	11	129	36
910	indian journal of psychiatry	24	415	40
915	inflammation and allergy - drug targets	1	24	4
917	inflammopharmacology	2	65	11
918	innovations in clinical neuroscience	15	256	6
925	international clinical psychopharmacology	81	2870	509
926	international immunopharmacology	1	40	4
927	international journal of adolescent medicine and health	3	46	5
932	international journal of clinical and experimental medicine	2	46	3
933	international journal of clinical pharmacology and therapeutics	2	65	6
934	international journal of clinical pharmacy	2	10	3
935	international journal of clinical practice	8	532	43
937	international journal of computational vision and robotics	1	1	2
942	international journal of endocrinology	1	141	6
943	international journal of environmental research and public health	2	12	2
945	international journal of geriatric psychiatry	18	598	24
947	international journal of gerontology	3	58	3
955	international journal of molecular sciences	52	1993	179
958	international journal of neuropsychopharmacology	81	3755	757
959	international journal of neuroscience	8	204	15
960	international journal of obesity	2	76	17
962	international journal of pharmaceutical research	2	0	3
966	international journal of psychiatry in clinical practice	55	317	88
967	international journal of psychiatry in medicine	9	100	7
968	international journal of psychophysiology	5	265	7
970	international journal of risk and safety in medicine	5	89	6
973	international journal of tryptophan research	1	14	3
974	international medical journal	9	7	17
976	international pharmacopsychiatry	6	90	5
978	international psychogeriatrics	14	355	7
979	international review of neurobiology	25	861	195
980	international review of psychiatry	29	905	38
983	iranian journal of allergy, asthma and immunology	1	16	6
986	iranian journal of medical sciences	2	39	2
988	iranian journal of psychiatry	3	7	2
992	irish journal of medical science	1	24	2
993	irish journal of psychological medicine	12	34	9
998	israel medical association journal	2	127	2
1002	italian journal of psychopathology	2	2	4
1003	itme 2011 - proceedings: 2011 ieee international symposium on it in medicine and education	1	2	3
1005	jama	9	2952	4
1006	jama - journal of the american medical association	2	1326	2
1008	jama neurology	1	28	8
1009	jama psychiatry	8	162	25
1012	japanese journal of neuropsychopharmacology	2	7	4
1013	japanese journal of pharmacology	4	150	22
1014	japanese journal of psychopharmacology	3	11	2
1021	journal of abnormal psychology	3	176	2
1027	journal of affective disorders	105	6026	253
1029	journal of alternative and complementary medicine	1	103	3
1030	journal of alzheimer's disease	7	257	53
1037	journal of applied toxicology	1	8	3
1040	journal of autism and childhood schizophrenia	6	182	10
1041	journal of autism and developmental disorders	5	235	5
1047	journal of biological chemistry	6	278	16
1048	journal of biological regulators and homeostatic agents	2	93	4
1049	journal of biomedical science	1	48	2
1050	journal of biomolecular screening	2	22	2
1051	journal of biomolecular structure and dynamics	3	29	17
1052	journal of biosciences	1	55	21
1057	journal of cellular biochemistry	1	38	5
1058	journal of cellular physiology	2	89	8
1059	journal of central south university (medical sciences)	2	25	22
1060	journal of cerebral blood flow and metabolism	4	53	7
1062	journal of chemical biology	1	20	4
1063	journal of chemical information and computer sciences	1	17	2
1066	journal of child and adolescent psychopharmacology	56	1234	62
1067	journal of child neurology	8	108	10
1068	journal of child psychology and psychiatry	1	11	2
1069	journal of child psychology and psychiatry and allied disciplines	7	2209	17
1075	journal of clinical and diagnostic research	3	3	2
1076	journal of clinical anesthesia	1	53	4
1081	journal of clinical gastroenterology	1	37	3
1084	journal of clinical investigation	1	87	4
1085	journal of clinical medicine	19	285	16
1090	journal of clinical pharmacology	10	625	12
1091	journal of clinical pharmacy and therapeutics	4	153	46
1092	journal of clinical psychiatry	247	15413	597
1093	journal of clinical psychopharmacology	155	5373	802
1097	journal of cognitive neuroscience	1	148	4
1099	journal of cognitive psychotherapy: an international quarterly	1	78	2
1100	journal of comparative neurology	3	179	2
1101	journal of computer-aided molecular design	2	34	3
1105	journal of developmental and behavioral pediatrics	3	107	4
1106	journal of drug delivery science and technology	1	10	5
1108	journal of drug development and clinical practice	2	0	5
1109	journal of dual diagnosis	3	12	7
1110	journal of ect	16	282	12
1111	journal of emergency medicine	5	104	3
1112	journal of endocrinological investigation	2	47	3
1115	journal of enzyme inhibition and medicinal chemistry	4	20	16
1116	journal of ethnopharmacology	5	55	10
1117	journal of experimental pharmacology	2	29	16
1122	journal of forensic psychiatry and psychology	3	16	1
1124	journal of genetics	1	34	13
1127	journal of geriatric psychiatry and neurology	12	275	18
1128	journal of head trauma rehabilitation	2	194	8
1129	journal of hepatology	1	176	5
1133	journal of human genetics	2	53	18
1134	journal of huntington's disease	1	49	2
1136	journal of infection and chemotherapy	2	6	2
1137	journal of integrative neuroscience	3	7	14
1138	journal of intellectual disability research	4	309	4
1139	journal of interferon and cytokine research	1	21	4
1141	journal of international medical research	3	46	19
1144	journal of labelled compounds and radiopharmaceuticals	4	40	2
1149	journal of medical genetics	1	476	21
1151	journal of medical investigation	1	70	14
1153	journal of medicinal chemistry	52	2955	194
1155	journal of mental health	1	47	2
1158	journal of microencapsulation	1	24	2
1160	journal of molecular graphics and modelling	1	27	3
1162	journal of molecular neuroscience	9	125	65
1163	journal of nervous and mental disease	21	1008	52
1164	journal of neural transmission	54	2660	480
1165	journal of neural transmission, supplement	5	143	33
1166	journal of neural transmission. supplementum	2	65	2
1168	journal of neurochemistry	37	2397	549
1170	journal of neuroendocrinology	5	529	10
1172	journal of neurogenetics	1	16	6
1173	journal of neuroimmune pharmacology	4	374	11
1174	journal of neuroimmunology	3	170	8
1175	journal of neuroinflammation	3	605	8
1177	journal of neurology	9	781	19
1179	journal of neurology, neurosurgery and psychiatry	7	384	6
1180	journal of neurology, supplement	3	101	5
1182	journal of neurophysiology	6	943	41
1184	journal of neuropsychiatry and clinical neurosciences	20	1170	146
1185	journal of neuroscience	22	3491	143
1186	journal of neuroscience methods	1	65	3
1187	journal of neuroscience research	8	453	108
1191	journal of nuclear medicine	8	503	50
1192	journal of nursing scholarship	1	7	5
1193	journal of nutrition, health and aging	1	27	2
1194	journal of obesity	1	29	5
1196	journal of obsessive-compulsive and related disorders	1	1	5
1203	journal of orthomolecular medicine	5	5	3
1212	journal of parkinson's disease	4	38	7
1216	journal of pediatric hematology/oncology	1	17	0
1221	journal of personalized medicine	21	174	56
1223	journal of pharmacological and toxicological methods	3	115	5
1224	journal of pharmacological sciences	9	427	34
1225	journal of pharmacology and experimental therapeutics	56	5389	677
1226	journal of pharmacology and pharmacotherapeutics	3	152	10
1229	journal of pharmacy practice	10	69	21
1230	journal of pharmacy practice and research	7	16	5
1231	journal of pharmacy technology	8	19	12
1232	journal of photochemistry and photobiology b: biology	1	21	2
1234	journal of physiology and pharmacology	5	203	18
1237	journal of postgraduate medicine	2	69	1
1239	journal of proteome research	2	100	5
1241	journal of psychiatric practice	28	533	30
1242	journal of psychiatric research	58	2032	219
1243	journal of psychiatry and law	2	6	14
1244	journal of psychiatry and neuroscience	59	3006	262
1245	journal of psychoactive drugs	12	253	6
1247	journal of psychopharmacology	120	5642	836
1248	journal of psychosocial nursing and mental health services	3	22	12
1249	journal of psychosomatic obstetrics and gynecology	1	96	2
1250	journal of psychosomatic research	6	282	10
1251	journal of receptor, ligand and channel research	1	1	7
1257	journal of scientific and industrial research	1	1	2
1258	journal of serotonin research	3	13	5
1259	journal of sex and marital therapy	1	188	14
1260	journal of sexual medicine	4	88	5
1261	journal of structural chemistry	2	2	11
1266	journal of the academy of consultation-liaison psychiatry	3	11	2
1267	journal of the american academy of child and adolescent psychiatry	43	3148	54
1268	journal of the american academy of child psychiatry	2	139	6
1270	journal of the american academy of psychiatry and the law	2	23	2
1274	journal of the american board of family practice	1	7	2
1277	journal of the american geriatrics society	8	553	6
1279	journal of the american medical directors association	8	317	5
1287	journal of the college of physicians and surgeons pakistan	3	36	19
1292	journal of the medical association of thailand	3	20	9
1293	journal of the neurological sciences	7	232	9
1297	journal of the royal society of medicine	4	72	3
1298	journal of thyroid research	1	60	5
1300	journal of toxicology - clinical toxicology	3	250	16
1304	journal of visualized experiments	1	6	3
1305	journal of women's health	3	374	7
1306	kaohsiung journal of medical sciences	1	20	13
1307	kitakanto medical journal	1	11	2
1308	klinik psikofarmakoloji bulteni	9	36	27
1310	korean journal of pain	1	9	2
1311	korean journal of physiology and pharmacology	3	19	7
1312	kuwait medical journal	1	0	2
1313	lancet	28	4729	242
1314	lancet neurology	2	331	4
1316	latin american journal of pharmacy	1	1	2
1319	letters in drug design and discovery	2	4	4
1320	life sciences	35	2549	282
1323	macedonian journal of medical sciences	1	0	6
1329	mayo clinic proceedings	5	677	9
1332	mechanisms of ageing and development	1	145	6
1333	medchemcomm	1	19	8
1338	medical clinics of north america	12	412	13
1339	medical hypotheses	48	1347	70
1341	medical journal of australia	11	183	3
1346	medical science monitor	9	255	12
1350	medicinal chemistry	3	21	13
1351	medicinal chemistry research	2	11	5
1352	medicinal chemistry reviews - online	1	6	9
1353	medicinal research reviews	6	723	26
1355	medicine (united kingdom)	10	15	5
1363	mental health aspects of developmental disabilities	13	53	5
1368	metabolic brain disease	6	226	19
1369	metabolic syndrome and related disorders	2	41	5
1372	methods in enzymology	1	1	3
1373	methods in molecular biology	4	46	29
1374	methods in pharmacology and toxicology	1	1	11
1377	milestones in drug therapy	4	9	6
1378	military medicine	2	12	2
1380	minerva medica	1	26	3
1381	minerva pneumologica	1	1	2
1382	minerva psichiatrica	11	11	17
1383	mini-reviews in medicinal chemistry	7	270	22
1389	molecular and cellular neuroscience	1	3	3
1390	molecular and chemical neuropathology	2	61	33
1392	molecular biology	6	18	32
1393	molecular biology reports	4	39	12
1394	molecular brain	3	90	10
1395	molecular brain research	4	219	8
1396	molecular cytogenetics	1	4	3
1398	molecular genetics and metabolism	3	77	10
1400	molecular interventions	2	84	6
1401	molecular medicine	4	125	31
1403	molecular medicine today	1	11	4
1404	molecular neurobiology	14	672	92
1407	molecular pharmacology	9	611	32
1408	molecular psychiatry	90	9399	1260
1409	molecular systems biology	1	57	3
1410	molecules	4	40	8
1412	mount sinai journal of medicine	8	264	6
1413	movement disorders	29	4888	131
1416	nagoya journal of medical science	2	35	14
1417	nanomedicine: nanotechnology, biology, and medicine	1	9	4
1418	nature	18	1355	25
1421	nature communications	4	286	4
1423	nature neuroscience	4	438	45
1425	nature reviews drug discovery	17	3353	49
1427	nature reviews neuroscience	7	1891	4
1429	naunyn-schmiedeberg's archives of pharmacology	8	139	41
1432	neural plasticity	2	136	2
1433	neural regeneration research	9	72	3
1435	neurobiology of aging	4	231	34
1436	neurobiology of disease	13	999	21
1437	neurobiology of learning and memory	4	145	48
1439	neurocase	4	74	10
1440	neurochemical journal	1	1	3
1441	neurochemical research	14	536	70
1442	neurochemistry international	17	817	166
1443	neurodegenerative disease management	1	2	2
1444	neurodegenerative diseases	3	47	4
1445	neuroendocrinology	3	151	4
1446	neuroendocrinology letters	9	115	31
1449	neuroimage	11	720	24
1451	neuroimaging clinics of north america	2	49	4
1452	neuroimmune pharmacology	1	0	2
1453	neuroimmunomodulation	2	186	2
1455	neurologic clinics	25	881	36
1456	neurological sciences	5	84	2
1457	neurologist	5	124	2
1458	neurology	24	2151	55
1459	neurology and therapy	2	24	4
1462	neurology india	3	70	5
1463	neurology international	3	20	16
1464	neurology psychiatry and brain research	6	44	8
1465	neurology: clinical practice	3	48	8
1466	neuromethods	11	7	12
1468	neuromolecular medicine	3	70	30
1469	neuron	11	1888	15
1470	neuropathology and applied neurobiology	2	26	19
1474	neuropharmacology	92	4808	664
1476	neuropsychiatric disease and treatment	56	2044	175
1479	neuropsychiatry	7	199	38
1481	neuropsychobiology	52	1543	256
1482	neuropsychologia	2	642	24
1484	neuropsychopharmacologia hungarica	5	50	18
1485	neuropsychopharmacologia hungarica : a magyar pszichofarmakológiai egyesület lapja = official journal of the hungarian association of psychopharmacology	2	40	2
1486	neuropsychopharmacology	149	16106	1274
1487	neuropsychopharmacology reports	1	22	12
1488	neuroquantology	3	12	2
1489	neuroreport	21	2019	213
1490	neurorx	2	61	6
1491	neuroscience	35	2277	284
1492	neuroscience and behavioral physiology	19	282	63
1493	neuroscience and biobehavioral reviews	69	8601	330
1494	neuroscience bulletin	3	35	22
1495	neuroscience letters	43	1536	380
1496	neuroscience research	7	135	74
1499	neurosciences research program bulletin	1	159	3
1500	neuroscientist	3	558	8
1504	neurotherapeutics	10	973	61
1505	neurotoxicity research	18	819	38
1507	neurourology and urodynamics	1	24	2
1509	new england journal of medicine	18	2374	21
1512	new trends in experimental and clinical psychiatry	5	9	4
1515	nicotine and tobacco research	1	581	4
1516	nmr in biomedicine	1	53	3
1518	nordic journal of psychiatry	24	316	97
1519	noropsikiyatri arsivi	5	12	3
1522	npj schizophrenia	3	250	11
1523	nuclear medicine and biology	3	94	2
1526	nutraceuticals: prospects, sources and role in health and disease	1	0	2
1527	nutrients	7	417	13
1529	nutrition journal	1	179	2
1531	obesity	1	15	3
1536	obstetrics and gynecology clinics of north america	3	73	3
1540	ochsner journal	1	94	5
1542	oncotarget	4	119	22
1544	open access macedonian journal of medical sciences	1	0	5
1546	open neurology journal	2	19	4
1547	open neuropsychopharmacology journal	1	13	20
1551	osteoporosis international	1	162	5
1555	p and t	12	128	9
1558	paediatric drugs	1	19	4
1559	paediatrics and child health	1	43	5
1561	pakistan journal of medical sciences	5	11	4
1562	pakistan journal of pharmaceutical sciences	3	11	9
1566	parkinsonism and related disorders	20	701	31
1567	pathogens	2	8	3
1568	patient preference and adherence	1	8	5
1569	pediatric annals	7	62	3
1570	pediatric clinics of north america	12	163	3
1572	pediatric drugs	7	201	16
1573	pediatric emergency care	4	90	4
1574	pediatric health	1	39	2
1579	peerj	2	8	7
1580	peptides	2	87	7
1582	periodicum biologorum	2	21	13
1584	personality neuroscience	1	1	2
1585	personalized medicine	5	27	34
1587	perspectives in psychiatric care	5	68	7
1588	pflugers archiv european journal of physiology	3	611	8
1590	pharmaceutical biology	1	19	5
1591	pharmaceutical journal	11	3	6
1595	pharmaceutical research	3	18	8
1596	pharmaceuticals	19	412	46
1598	pharmaceutisch weekblad scientific edition	2	19	3
1601	pharmacoepidemiology and drug safety	10	363	16
1602	pharmacogenetics	6	402	89
1603	pharmacogenetics and genomics	6	490	49
1604	pharmacogenomics	40	1219	346
1605	pharmacogenomics and personalized medicine	4	156	71
1606	pharmacogenomics journal	25	1816	250
1607	pharmacological reports	18	307	110
1608	pharmacological research	16	652	66
1609	pharmacological reviews	16	4801	58
1611	pharmacology	3	166	7
1612	pharmacology & toxicology	4	131	23
1613	pharmacology and therapeutics	27	4618	372
1616	pharmacology biochemistry and behavior	43	1947	326
1617	pharmacology research and perspectives	4	62	13
1618	pharmacology, biochemistry and behavior	5	407	42
1619	pharmacopsychiatry	72	2387	261
1620	pharmacotherapy	21	546	19
1621	pharmacotherapy: the journal of human pharmacology and drug therapy	3	231	6
1624	pharmacy world and science	4	94	34
1625	pharmakopsychiatrie und neuropsychopharmakologie	4	168	3
1628	philosophical transactions of the royal society b: biological sciences	2	340	7
1630	physiological reports	1	9	4
1631	physiological research	2	46	3
1632	physiological reviews	3	2098	6
1633	physiology and behavior	4	246	8
1634	physiology and pharmacology	1	10	6
1635	phytotherapy research	4	298	9
1640	plos medicine	5	254	4
1641	plos one	27	1156	48
1642	pm and r	1	40	2
1643	polish journal of pharmacology	7	185	20
1645	polypharmacy in psychiatry practice volume i: multiple medication use strategies	1	1	4
1646	postepy psychiatrii i neurologii	3	0	2
1647	postgraduate medical journal	9	209	23
1648	postgraduate medicine	8	112	2
1655	prilozi (makedonska akademija na naukite i umetnostite. oddelenie za medicinski nauki)	1	16	4
1656	primary care - clinics in office practice	14	335	4
1658	primary care companion for cns disorders	10	5	2
1659	primary care companion to the journal of clinical psychiatry	20	615	23
1661	primary care psychiatry	4	35	5
1663	primary psychiatry	57	130	32
1665	probiotics and antimicrobial proteins	1	4	2
1666	proceedings of the national academy of sciences of the united states of america	15	1474	35
1667	profiles of drug substances, excipients and related methodology	1	32	8
1669	progress in brain research	28	1426	253
1670	progress in drug research	3	62	4
1672	progress in medicinal chemistry	3	76	5
1673	progress in molecular biology and translational science	3	95	7
1675	progress in neuro-psychopharmacology and biological psychiatry	145	7191	885
1676	progress in neurobiology	15	2804	80
1677	progress in neurology and psychiatry	14	14	6
1678	progress in neuropsychopharmacology and biological psychiatry	19	414	20
1680	prostaglandins leukotrienes and essential fatty acids	3	522	9
1684	psychiatria danubina	48	565	36
1685	psychiatria i psychologia kliniczna	1	0	5
1686	psychiatria polska	8	89	6
1688	psychiatric annals	18	129	11
1689	psychiatric bulletin	11	65	3
1690	psychiatric clinics of north america	67	2815	200
1691	psychiatric clinics of north america: annual of drug therapy	1	5	6
1692	psychiatric genetics	39	1030	265
1693	psychiatric quarterly	10	349	6
1694	psychiatric research and clinical practice	1	7	2
1695	psychiatric services	25	1051	30
1698	psychiatry	18	627	13
1699	psychiatry (edgemont)	2	47	3
1701	psychiatry and clinical neurosciences	45	1406	206
1702	psychiatry and clinical psychopharmacology	3	38	6
1703	psychiatry investigation	18	242	56
1704	psychiatry research	129	3795	710
1705	psychiatry research - neuroimaging	11	291	67
1706	psychiatry research journal	2	0	11
1707	psychiatry research: neuroimaging	1	33	2
1713	psychobiology	1	13	3
1715	psychological medicine	21	1135	93
1717	psychology and neuroscience	2	55	5
1718	psychoneuroendocrinology	15	1069	59
1719	psychopathology	5	127	20
1720	psychopharm review	6	21	3
1722	psychopharmacology	228	17805	2142
1723	psychopharmacology bulletin	35	1170	155
1726	psychosomatics	24	595	23
1728	psychotherapy and psychosomatics	18	1072	66
1736	recent patents on biotechnology	1	19	2
1737	recent patents on cns drug discovery	5	81	8
1738	recent patents on endocrine, metabolic and immune drug discovery	1	2	11
1739	receptors	12	18	64
1740	receptors and channels	1	11	2
1742	reproduction nutrition development	1	207	5
1743	reproductive sciences	1	5	3
1747	research and practice in thrombosis and haemostasis	2	45	4
1749	research in developmental disabilities	1	31	2
1752	research publications - association for research in nervous and mental disease	2	64	4
1760	reviews in the neurosciences	15	559	120
1761	reviews on recent clinical trials	2	55	13
1763	revista brasileira de psiquiatria	15	380	49
1767	revista de psiquiatria clinica	12	15	4
1773	rivista di psichiatria	2	44	4
1774	rna biology	3	303	20
1775	romanian journal of morphology and embryology	1	3	4
1778	rsc drug discovery series	2	2	8
1779	rsc medicinal chemistry	1	5	7
1781	russian journal of genetics	3	6	12
1783	sage open medicine	1	14	9
1785	sao paulo medical journal	1	33	4
1787	saudi pharmaceutical journal	2	14	2
1789	scandinavian journal of rheumatology, supplement	1	50	3
1791	schizophrenia bulletin	70	8552	347
1792	schizophrenia bulletin open	2	9	2
1793	schizophrenia research	165	9616	1583
1794	schizophrenia research and treatment	1	60	5
1795	schizophrenia research: cognition	1	2	13
1796	schizophrenic psychology: new research	1	4	11
1797	science	19	2702	108
1799	science signaling	4	89	4
1801	scientia pharmaceutica	1	3	13
1802	scientific reports	5	83	24
1808	seminars in cell and developmental biology	2	125	3
1810	seminars in cutaneous medicine and surgery	4	27	3
1814	seminars in neurology	7	173	4
1816	seminars in nuclear medicine	2	52	2
1823	serbian journal of experimental and clinical research	2	3	15
1824	serotonin and melatonin: their functional role in plants, food, phytomedicine, and human health	2	0	9
1825	serotonin receptor technologies	1	0	4
1826	serotonin: the mediator that spans evolution	1	2	14
1832	signal transduction and targeted therapy	3	360	3
1835	sleep	2	343	2
1836	sleep and biological rhythms	2	23	7
1839	sleep medicine	4	59	2
1840	sleep medicine clinics	9	188	15
1842	sleep medicine reviews	3	289	7
1844	social psychiatry and psychiatric epidemiology	1	24	3
1848	south african medical journal	4	28	4
1850	south african psychiatry review	2	1	3
1852	southern medical journal	7	225	6
1854	spanish journal of psychology	1	4	2
1857	stress: physiology, biochemistry, and pathology handbook of stress series, volume 3	1	9	3
1859	substance use and misuse	5	233	3
1866	swiss medical weekly	1	38	2
1867	synapse	21	1501	156
1870	the american journal of psychiatry	7	49	2
1871	the bmj	2	11	2
1872	the british journal of psychiatry : the journal of mental science	3	91	9
1874	the curated reference collection in neuroscience and biobehavioral psychology	2	1	3
1875	the effects of drug abuse on the human nervous system	1	3	9
1877	the japanese journal of pharmacology	3	140	29
1879	the journal of clinical psychiatry	10	384	3
1880	the journal of mental science	6	57	7
1881	the journal of prevention of alzheimer's disease	2	79	11
1883	the lancet	21	3339	168
1884	the lancet neurology	2	209	3
1886	the lancet psychiatry	16	672	34
1887	the nebraska medical journal	1	16	5
1893	therapeutic advances in chronic disease	2	8	1
1895	therapeutic advances in neurological disorders	2	530	4
1896	therapeutic advances in psychopharmacology	21	451	70
1897	therapeutic advances in urology	1	10	1
1898	therapeutic drug monitoring	7	664	49
1899	therapeutics and clinical risk management	2	225	13
1900	therapie	2	15	2
1901	therapy	2	18	17
1902	thescientificworldjournal	2	81	6
1903	thyroid	1	29	1
1907	topics in medicinal chemistry	3	22	10
1908	toxicologic pathology	1	40	5
1909	toxicology	2	18	9
1910	toxicology and applied pharmacology	1	62	1
1911	toxicology letters	2	116	1
1912	toxicology reports	2	19	1
1913	toxins	1	25	2
1915	traditional and kampo medicine	3	4	3
1918	translational neuroscience	6	292	48
1919	translational psychiatry	23	497	62
1927	trends in cognitive sciences	2	68	1
1928	trends in endocrinology and metabolism	1	89	2
1929	trends in genetics	1	79	5
1930	trends in medical research	1	4	1
1931	trends in molecular medicine	5	453	12
1932	trends in neurosciences	8	1420	42
1933	trends in pharmacological sciences	25	3251	108
1936	trichotillomania (hair pulling disorder): clinical characteristics, psychological interventions and emotional effects	1	1	2
1938	tropical gastroenterology : official journal of the digestive diseases foundation	1	7	1
1942	twin research and human genetics	1	20	1
1943	tzu chi medical journal	1	0	3
1944	u.s. pharmacist	16	25	11
1945	ulster medical journal	2	28	1
1946	urologic clinics of north america	2	31	1
1947	value in health	1	6	2
1948	virologica sinica	1	6	6
1952	vojnosanitetski pregled	2	17	1
1953	west african journal of medicine	2	23	2
1958	women and birth	1	43	0
1959	women's health	5	182	14
1960	world journal of biological psychiatry	43	1150	146
1963	world neurosurgery	3	98	2
1964	world psychiatry	22	3264	42
1966	yeni symposium	1	7	1
1968	zebrafish	1	1	1
1971	zhurnal nevrologii i psihiatrii imeni s.s. korsakova	4	8	7

## Sheet: Keywords
id	keyword	occurrences	total link strength
18543	humans	10727	475123
33210	schizophrenia	8268	345214
30010	priority journal	5658	242645
4997	article	5376	219741
4548	antipsychotic agents	5243	245249
11395	depression	5170	256083
34065	serotonin uptake inhibitor	4757	235116
32441	review	4411	232300
30901	psychosis	4205	207416
22049	male	4097	161444
26201	nonhuman	4044	188858
33744	serotonin	3800	144185
4371	antidepressant	3589	190177
14988	female	3429	140630
3052	adult	3192	124851
9314	clozapine	3121	154208
32595	risperidone	3003	155612
10098	controlled study	2870	113970
22728	mental disease	2796	140779
26792	olanzapine	2680	145532
17354	haloperidol	2626	135078
4656	anxiety disorder	2559	143490
12757	drug efficacy	2395	131279
12273	dopamine	2335	101608
6376	bipolar disorder	2089	107504
9209	clinical trial	1960	107860
31349	quetiapine	1877	108095
34420	side effect	1820	120128
15365	fluoxetine	1795	103646
38315	unclassified drug	1680	85147
22017	major clinical study	1631	65279
9471	cognitive defect	1506	86095
21425	lithium	1426	76368
12755	drug effect	1367	63987
5277	atypical antipsychotic agent	1366	77007
33794	serotonin 2a receptor	1354	58878
12818	drug mechanism	1339	71655
37831	treatment outcome	1329	65927
4891	aripiprazole	1275	77103
29033	placebo	1265	76053
14654	extrapyramidal symptom	1253	72152
12871	drug safety	1245	77446
12280	dopamine 2 receptor	1238	58568
34164	sertraline	1229	73672
27739	paroxetine	1227	73302
38342	unindexed drug	1209	86514
27823	pathophysiology	1206	59666
33959	serotonin receptor	1149	47831
23430	middle aged	1148	49686
22903	metabolism	1133	51804
38603	valproic acid	1130	67219
6757	brain	1128	48840
8593	chlorpromazine	1122	58416
23922	mood disorder	1120	63454
9444	cognition	1101	55372
19694	insomnia	1067	74171
39679	ziprasidone	1061	62389
39312	weight gain	1054	67221
9027	citalopram	1053	64533
27696	parkinson disease	1045	57663
9704	comorbidity	1030	55810
32574	risk factors	1025	53909
9109	clinical article	1024	36853
7541	carbamazepine	1010	60186
3194	aged	991	45330
5931	benzodiazepine derivative	989	54893
38748	venlafaxine	950	59098
2945	adolescent	928	43420
3670	alzheimer disease	926	48840
12853	drug receptor binding	892	44777
26251	noradrenalin	889	41464
25009	nausea	887	64920
30965	psychotic disorders	873	37597
12535	dose response	837	43951
31879	receptors, serotonin	836	32664
9148	clinical feature	827	40897
11978	disease association	827	41676
30998	psychotropic agent	822	44835
33420	sedation	816	58417
12906	drug tolerability	814	51748
26661	obsessive compulsive disorder	814	43835
12927	drug withdrawal	812	52455
12006	disease severity	803	42868
5229	attention deficit disorder	779	43518
22115	mania	776	45917
25763	neurotransmission	775	38281
15396	fluvoxamine	773	44050
34144	serotoninergic system	763	33340
23850	monoamine oxidase inhibitor	757	43005
23552	mirtazapine	754	48676
19136	imipramine	748	43905
4369	anticonvulsive agent	746	44401
3734	amfebutamone	744	47067
29941	prevalence	744	41621
16401	genetics	743	33529
33765	serotonin 1a receptor	737	34447
30951	psychotherapy	725	39451
11294	dementia	698	39981
13417	electroconvulsive therapy	691	36493
29788	prefrontal cortex	690	30609
34029	serotonin transporter	690	28988
16780	glutamic acid	689	33235
16447	genotype	681	27970
7735	case report	680	22331
17466	headache	674	47682
3276	akathisia	672	43669
17325	hallucination	670	39001
36543	tardive dyskinesia	665	40344
3224	agitation	662	43771
3851	amitriptyline	661	41305
33437	seizure	655	47797
35173	somnolence	647	47235
5354	autism	638	33778
33946	serotonin noradrenalin reuptake inhibitor	634	36620
34738	sleep disorder	634	41359
8511	children	631	33386
33919	serotonin antagonist	629	27742
25765	neurotransmitter	625	30367
12126	dizziness	620	49603
12398	dopamine receptor	617	27139
17995	hippocampus	613	30529
12821	drug metabolism	611	39755
12690	drug blood level	608	38483
34468	signal transduction	604	30216
1112	4 aminobutyric acid	591	29826
30877	psychopharmacotherapy	590	30216
10015	constipation	589	45353
23935	mood stabilizer	588	34178
9264	clomipramine	587	34153
16322	genetic association	583	25519
20854	lamotrigine	582	37365
33921	serotonin antagonists	582	23028
29605	posttraumatic stress disorder	576	32551
37850	treatment response	575	31204
36029	suicide	569	28516
5782	behavior disorder	568	34087
37875	tremor	568	43280
22120	manic depressive psychosis	567	17928
16361	genetic polymorphism	563	24912
30870	psychopharmacology	562	27593
5928	benzodiazepine	554	30558
31296	quality of life	553	33114
18760	hypertension	549	40586
8120	central nervous system	546	23389
14180	escitalopram	539	34579
27724	parkinsonism	538	34275
28879	physiology	533	24439
3208	aggression	527	28519
34283	sexual dysfunction	524	37129
37790	trazodone	524	32334
39540	xerostomia	520	41203
21113	letter	519	13533
16389	genetic variability	515	23744
3848	amisulpride	514	30233
21172	levodopa	513	29940
12494	dopaminergic system	512	24002
27180	orthostatic hypotension	508	39141
3883	amphetamine	499	25917
9521	cognitive therapy	499	28675
9929	conference paper	497	19627
23092	methylphenidate	497	31871
29900	prescription	495	27256
25072	negative syndrome	492	23515
12426	dopamine receptor stimulating agent	490	28465
34539	single nucleotide polymorphism	485	23393
4594	antipsychotics	483	24798
14892	fatigue	483	37698
21601	lorazepam	483	30246
6803	brain derived neurotrophic factor	482	25273
22850	meta analysis	481	26637
7140	buspirone	480	28316
37052	thioridazine	480	27617
30343	protein expression	477	23281
33813	serotonin 2c receptor	475	22819
39162	vomiting	473	36472
32571	risk assessment	470	26065
16189	gene expression	467	22902
33264	schizophrenic psychology	465	18252
5775	behavior	464	20198
26629	obesity	464	28014
33203	schizoaffective psychosis	460	25355
31794	receptor, serotonin, 5-ht2a	459	18350
36404	systematic review	456	27961
23906	monotherapy	455	28620
30824	psychology	454	21815
12540	dose-response relationship, drug	449	20064
29454	positron emission tomography	449	22688
14008	epilepsy	446	26287
4672	anxiolytic agent	445	24160
11476	desipramine	443	28024
30717	psychiatric status rating scales	439	17776
21639	low drug dose	438	30183
13274	editorial	434	13922
11607	diabetes mellitus	432	28624
12820	drug megadose	429	29259
24722	n methyl dextro aspartic acid receptor	424	20720
25158	nerve cell plasticity	423	22710
24031	motor dysfunction	421	27302
35925	substance abuse	418	22803
2537	acetylcholine	417	20414
27842	patient compliance	417	25466
25503	neurologic disease	416	25126
28589	phenotype	416	19778
11278	delusion	413	21656
12726	drug dependence	413	22779
29687	practice guideline	413	24662
3367	alcoholism	410	21585
26351	nortriptyline	409	26370
12899	drug targeting	405	22394
31003	psychotropic drugs	405	23751
12869	drug response	404	20137
36470	tachycardia	403	31935
13117	dystonia	401	26948
11691	diarrhea	399	33124
27542	panic	399	23372
9947	confusion	395	30550
12778	drug half life	395	27689
30727	psychiatry	395	18610
34023	serotonin syndrome	394	26107
31565	randomized controlled trial (topic)	391	23194
38386	unspecified side effect	391	26417
11698	diazepam	388	23798
11983	disease course	384	21114
10090	controlled clinical trial	383	17541
39598	young adult	383	18261
25446	neuroimaging	382	19628
28279	perphenazine	382	21697
11250	delirium	381	26456
27805	pathogenesis	380	18815
6204	binding affinity	379	20076
22740	mental health	379	18469
9270	clonazepam	377	22988
3245	agranulocytosis	376	25097
15437	follow up	376	18877
32318	restlessness	372	27017
11430	depressive disorder, major	371	18518
31828	receptors, dopamine d2	371	15909
30152	prolactin	370	18312
36021	suicidal behavior	370	19524
8678	cholinergic receptor blocking agent	369	21584
37806	treatment duration	369	21021
15376	fluphenazine	366	19736
11642	diagnostic and statistical manual of mental disorders	364	18220
33911	serotonin agonist	363	17998
36281	symptom	363	18611
18885	hypotension	361	28516
20557	ketamine	360	20260
26499	nuclear magnetic resonance imaging	359	18812
28314	personality disorder	359	19114
37415	topiramate	357	24526
12410	dopamine receptor blocking agent	355	17038
12285	dopamine 3 receptor	353	17876
30349	protein function	352	17765
31564	randomized controlled trial	350	16654
12839	drug potentiation	349	22897
31621	rating scale	349	16497
28973	piperazines	348	16248
21519	locomotion	347	15555
12281	dopamine 2 receptor blocking agent	345	16414
10199	corpus striatum	344	15965
36030	suicide attempt	344	17984
29438	positive and negative syndrome scale	343	17574
15907	gabapentin	342	23140
9717	comparative study	341	15283
33785	serotonin 2 receptor	341	13537
13087	dyskinesia	339	21518
25329	neurobiology	338	16540
13022	duloxetine	335	23233
18747	hyperprolactinemia	335	22046
29325	polymorphism, genetic	334	13739
36024	suicidal ideation	334	21460
6883	brain region	333	16114
28440	pharmacogenetics	333	17640
36300	symptomatology	333	15812
9189	clinical practice	331	17639
20249	irritability	331	24487
16106	gastrointestinal symptom	330	25771
16196	gene frequency	329	12978
5792	behavior therapy	328	17848
28554	phencyclidine	328	15244
38047	tryptophan	328	13179
5938	benzodiazepines	326	15144
12658	drowsiness	326	25547
22669	memory disorder	326	22566
6825	brain function	325	16086
34230	sex difference	322	16085
12903	drug therapy, combination	321	14989
22665	memory	318	15119
12276	dopamine 1 receptor	315	15674
31279	qt prolongation	314	24690
36083	sulpiride	314	16199
8688	cholinesterase inhibitor	313	18838
30791	psychological aspect	312	13602
11775	differential diagnosis	311	17244
34161	sertindole	310	16089
4543	antipsychotic	309	15082
25051	nefazodone	309	19053
12260	donepezil	307	19142
31705	receptor affinity	302	14240
7657	cardiovascular disease	301	21483
16167	gene	301	13331
29794	pregnancy	300	17657
11986	disease exacerbation	299	19064
25479	neuroleptic malignant syndrome	298	20471
3434	allele	296	12143
27483	paliperidone	296	18592
18486	human cell	295	10853
33791	serotonin 2a antagonist	295	13998
4170	anorexia	293	23599
9446	cognition disorders	292	14862
18350	hospitalization	292	14248
12749	drug dose increase	291	19761
12888	drug structure	290	15683
16380	genetic susceptibility	290	12335
12920	drug use	287	16299
6027	beta adrenergic receptor blocking agent	286	17625
5794	behavior, animal	284	12077
36336	synaptic transmission	284	13665
12838	drug potency	283	15043
25758	neurotoxicity	282	19387
4764	apomorphine	281	14458
26386	note	281	8804
27452	pain	281	18591
12120	dizocilpine	279	13100
17578	heart arrhythmia	279	23124
23925	mood disorders	278	14151
38602	valproate semisodium	278	17138
3707	amantadine	277	18459
27250	outcome assessment	276	14620
9409	cocaine	274	14540
6792	brain cortex	272	12725
12550	double blind procedure	272	12108
39421	withdrawal syndrome	272	18329
9773	complication	270	13831
12753	drug dose titration	270	19943
38357	united states	270	14369
12787	drug indication	268	16500
12669	drug activity	267	13440
22765	mental patient	267	13792
25650	neuroprotection	267	15786
25546	neuromodulation	266	12834
26674	obsessive-compulsive disorder	265	10781
1363	5 hydroxyindoleacetic acid	262	8777
12430	dopamine release	262	12802
25345	neurochemistry	262	12492
6373	bipolar depression	260	15692
12189	dna polymorphism	260	10387
25613	neuropathology	259	12624
11554	dexamphetamine	257	15257
4105	animal behavior	255	11487
22870	metabolic disorder	255	16940
29880	prepulse inhibition	255	11410
7790	catechol methyltransferase	254	12039
27049	oral drug administration	254	8521
22628	memantine	253	16246
30633	psychedelic agent	253	10900
12682	drug antagonism	252	13510
35774	stress	250	12866
24021	motor activity	249	10509
19308	in vitro study	248	11392
30059	procedures	246	12694
39457	working memory	246	13424
9273	clonidine	245	15760
31826	receptors, dopamine	245	10806
32087	relapse	245	13030
26539	nucleus accumbens	244	11670
30941	psychostimulant agent	244	14892
32412	retrospective study	244	12778
12750	drug dose reduction	243	17009
33955	serotonin plasma membrane transport proteins	243	9754
14398	evidence based medicine	241	14451
12805	drug interactions	240	13572
16290	generalized anxiety disorder	240	14519
23915	mood	240	11071
24730	n methyl dextro aspartic acid receptor blocking agent	240	12414
26261	noradrenalin uptake inhibitor	240	13993
12497	dopaminergic transmission	239	12145
16364	genetic predisposition to disease	239	10372
32603	ritanserin	239	10304
19512	inflammation	238	13679
12663	drug abuse	237	12394
13854	environmental factor	237	12937
12902	drug therapy	236	9870
28980	piperidines	236	9642
6292	biological marker	235	11606
18670	hyperactivity	235	13543
32612	rivastigmine	234	15199
15636	frontal cortex	233	10471
15796	g protein coupled receptor	233	11781
32138	remission	233	12724
37243	time factors	233	10094
12312	dopamine antagonists	232	10257
13205	eating disorder	232	13683
19325	in vivo study	232	11376
19348	incidence	232	13268
21490	liver toxicity	232	19986
26301	norepinephrine	232	8896
28939	pimozide	232	13677
13431	electroencephalography	231	10588
18597	hydrocortisone	231	11806
21875	lysergide	231	10419
33478	selegiline	231	16318
12289	dopamine 4 receptor	230	11316
22898	metabolic syndrome x	230	15652
28639	phenytoin	230	16320
3186	age	229	11276
15726	functional magnetic resonance imaging	229	10917
21008	learning	229	11290
26903	ondansetron	229	13268
11992	disease model	228	11108
22841	messenger rna	228	10840
12730	drug design	227	11976
7041	bromocriptine	226	13783
16371	genetic risk	226	10444
12895	drug synthesis	225	10294
34379	short survey	225	8391
23987	mortality	224	13700
8157	central stimulant agent	223	13719
30127	prognosis	223	11146
29448	positive syndrome	221	12310
33899	serotonin 6 receptor	221	11617
34968	social interaction	221	12254
3625	alprazolam	220	13515
5226	attention	220	10983
6623	body mass	220	11641
9536	cohort analysis	220	11232
12577	doxepin	218	14877
12662	drug absorption	218	15099
12756	drug effects	218	10794
18538	human tissue	218	7915
27335	oxidative stress	218	13033
30153	prolactin blood level	218	13573
34984	social phobia	218	12490
4658	anxiety disorders	217	11204
37934	trifluoperazine	217	11577
23450	migraine	215	13623
12789	drug induced disease	214	10459
13429	electroencephalogram	214	11149
2794	addiction	213	10870
26963	opiate	213	12970
31791	receptor, serotonin, 5-ht1a	213	9088
12889	drug substitution	212	13797
20562	ketanserin	212	9689
30665	psychiatric diagnosis	212	10661
39319	weight reduction	212	16364
25766	neurotransmitter agents	211	10156
26654	obsession	210	7784
30221	propranolol	210	12491
11981	disease classification	209	10715
16363	genetic predisposition	209	9947
19296	impulsiveness	209	11431
12689	drug bioavailability	208	13640
23176	mianserin	208	11636
21556	long term care	207	12133
22996	methamphetamine	207	11708
25605	neurons	206	9289
4530	antiparkinson agent	205	12214
11434	depressive psychosis	205	10514
21766	lurasidone	205	11966
33784	serotonin 2 antagonist	205	9684
27606	paranoia	204	11418
35853	structure activity relation	203	9467
12862	drug research	202	10049
25203	nervous system development	202	11887
8876	chronic disease	201	9605
12558	double-blind method	201	8603
8360	chemistry	200	9296
14662	extrapyramidal syndrome	200	12665
16217	gene mutation	200	10359
21431	lithium carbonate	200	9458
3152	affective neurosis	199	6772
18251	homovanillic acid	199	7067
3319	alcohol	198	11458
4698	apathy	198	11839
27709	parkinson's disease	198	10953
16530	gilles de la tourette syndrome	197	12296
23696	modafinil	197	13895
30187	promoter region	197	8139
4347	anticholinergic effect	196	13389
15372	flupentixol	196	10183
16705	glutamate	196	9278
33903	serotonin 7 receptor	196	10317
36977	therapy	196	6701
3981	analysis of variance	195	7899
6501	blood brain barrier	195	11540
25141	nerve cell	195	9453
9461	cognitive behavioral therapy	194	10114
25688	neuropsychiatry	194	9222
33762	serotonin 1a agonist	194	9740
38477	urine retention	194	17066
12875	drug screening	193	9269
17838	heredity	193	9634
13591	emotion	192	8964
18913	hypothalamus hypophysis adrenal system	192	10335
22602	melatonin	192	11124
32411	retrospective studies	192	9784
37794	treatment	192	11653
23025	methodology	191	9432
29327	polymorphism, single nucleotide	191	7785
29342	polypharmacy	191	11152
37834	treatment planning	191	11132
10832	cytochrome p450 2d6	190	12261
18753	hypersalivation	190	13518
5188	atomoxetine	189	13447
12443	dopamine transporter	188	9688
33322	scoring system	188	8664
3861	amnesia	187	11884
9214	clinical trials	187	9521
17343	hallucinogens	187	7039
31714	receptor binding	187	8421
39028	visual hallucination	187	11253
23828	monoamine	186	8585
35944	substance-related disorders	186	9828
38822	vertigo	186	13179
6801	brain depth stimulation	182	11119
8229	cerebrospinal fluid	182	7583
18697	hyperglycemia	182	14063
29708	pramipexole	182	12161
6638	body weight	181	11267
16317	genetic analysis	181	8518
22483	medical research	181	8246
27820	pathology	181	9176
29762	prediction	181	8909
2787	add on therapy	180	12081
26232	nonsteroid antiinflammatory agent	180	12613
39703	zotepine	180	9974
24606	n [2 [4 (2 methoxyphenyl) 1 piperazinyl]ethyl] n (2 pyridyl)cyclohexanecarboxamide	179	8548
37819	treatment indication	179	10889
11997	disease predisposition	178	9421
14000	epigenetics	178	8700
15445	food and drug administration	178	10413
31719	receptor blocking	178	8690
4662	anxiety neurosis	177	6905
15959	galantamine	177	11647
7739	case-control studies	176	7236
31690	reboxetine	176	11442
32573	risk benefit analysis	176	10626
5046	asenapine	175	10849
7769	catalepsy	175	8663
28934	pimavanserin	175	8913
34533	single drug dose	175	12445
34725	sleep	175	9099
26921	onset age	174	9278
31347	questionnaire	174	8247
6496	blood	173	7180
11208	degenerative disease	173	10478
14834	family history	173	9396
18559	huntington chorea	173	9790
25213	nervousness	173	14381
26122	non insulin dependent diabetes mellitus	173	11847
33822	serotonin 3 receptor	173	8076
23953	morbidity	172	9768
28429	pharmacodynamics	172	10013
34011	serotonin release	172	6987
27836	patient care	171	10357
19080	iloperidone	170	10023
28562	phenelzine	170	10505
28967	piperazine derivative	170	8326
31748	receptor occupancy	170	8394
12683	drug approval	169	11133
534	2 dipropylamino 8 hydroxytetralin	168	7799
6810	brain development	168	8939
19882	interleukin 6	168	9966
31463	raclopride	168	7643
36139	support, non-u.s. gov't	168	5156
7733	case control study	167	7205
18021	histamine h1 receptor	167	9815
8128	central nervous system disease	166	10480
3197	aged, 80 and over	165	8336
3217	aging	165	9221
5902	benzatropine	165	10286
10231	corticosteroid	165	11538
24327	muscarinic receptor	165	8384
25698	neuropsychological test	165	8782
25904	nicotine	165	8637
6811	brain disease	164	9733
11984	disease duration	164	7619
34864	smoking	164	9223
14236	estrogen	163	8858
22776	mental stress	163	8316
31796	receptor, serotonin, 5-ht2c	163	6804
5161	ataxia	162	13045
24254	multiple sclerosis	162	9702
5413	automutilation	161	9882
13115	dysthymia	161	8757
23694	moclobemide	161	9950
33912	serotonin agonists	161	6997
34215	severity of illness index	160	7383
37101	thrombocyte	160	4481
4096	anhedonia	159	8832
6390	bipolar i disorder	159	9714
10203	correlation analysis	158	7232
11634	diagnosis, differential	158	8029
32126	rem sleep	158	8595
7491	cannabis	157	8684
12747	drug dose comparison	157	11095
22011	maintenance therapy	157	9482
23238	microdialysis	157	6707
23429	middle age	157	4213
31963	recurrent disease	157	9199
34932	social behavior	157	7611
37597	transcranial magnetic stimulation	157	9206
13875	enzyme activity	156	8317
15640	frontal lobe	155	6699
16735	glutamate receptor	155	7532
37767	tranylcypromine	155	9474
6784	brain chemistry	154	6121
22538	medline	154	9726
27321	oxcarbazepine	154	11914
5432	autopsy	153	6354
12481	dopaminergic nerve cell	153	7739
10817	cytochrome p450	152	9145
12714	drug cost	152	8436
21665	loxapine	152	8243
30812	psychological rating scale	152	7707
2382	abdominal pain	151	12912
3498	alpha (2,3 dimethoxyphenyl) 1 [2 (4 fluorophenyl)ethyl] 4 piperidinemethanol	151	6474
4469	antihistaminic agent	151	9659
13103	dyspepsia	151	12271
18841	hypomania	151	9730
25779	neurotransmitter release	151	7631
29314	polymerase chain reaction	151	5559
21307	limbic system	150	7020
25198	nerve tissue proteins	150	6482
39690	zolpidem	150	9692
13093	dyslipidemia	149	10634
12877	drug selectivity	148	7770
30725	psychiatrist	148	7266
36569	task performance	148	6678
3437	alleles	147	5422
3917	amygdaloid nucleus	147	7407
6640	body weight disorder	147	9979
12794	drug induced headache	147	12611
12833	drug overdose	147	10689
16662	glucose	146	8236
18799	hypnotic agent	146	8086
22743	mental health care	146	7160
38927	violence	146	6582
7651	cardiotoxicity	145	10798
9158	clinical global impression scale	145	7883
24897	naltrexone	145	9441
28448	pharmacogenomics	145	8435
28456	pharmacokinetics	145	7031
32220	reserpine	145	7258
6585	blurred vision	144	13433
8238	cerebrovascular accident	143	11242
9210	clinical trial (topic)	143	7935
4560	antipsychotic drugs	142	6401
12990	dsm-5	142	7121
13107	dysphoria	142	9365
30916	psychosocial care	142	8836
36238	sweating	142	11681
11310	demography	141	7227
23966	morphine	141	8892
3191	age factors	140	7358
3766	amine oxidase (flavin containing)	140	5378
6704	borderline state	140	7353
16350	genetic linkage	140	5732
18640	hydroxyindoleacetic acid	140	3996
6544	blood platelets	139	3843
12758	drug elimination	139	10092
17402	haplotype	139	5881
22754	mental health service	139	6239
7102	bulimia	138	8590
12769	drug fatality	138	11557
30409	protein localization	138	7239
34548	single photon emission computer tomography	138	7256
8204	cerebral cortex	137	5412
9002	circadian rhythm	137	6710
12830	drug monitoring	137	9012
28586	phenothiazine derivative	137	7102
16828	glycine	136	6928
24182	multicenter study	136	6767
25699	neuropsychological tests	136	6531
37570	tranquilizing activity	136	8088
18334	hospital patient	135	7063
18848	hyponatremia	135	10744
30305	protein binding	135	6275
35568	startle reflex	135	5574
5313	auditory hallucination	134	7127
15905	gabaergic system	134	7143
16665	glucose blood level	134	9308
5286	atypical antipsychotics	133	6957
10493	cross-sectional study	133	6521
17483	health care cost	133	7060
25157	nerve cell network	133	6564
27862	patient monitoring	133	8597
36141	support, u.s. gov't, p.h.s.	132	3997
37219	tic	132	9091
38405	upregulation	132	7779
39707	zuclopenthixol	132	7682
9111	clinical assessment	131	7149
28977	piperidine derivative	131	5961
31933	recommended drug dose	131	10826
3501	alpha 1 adrenergic receptor	130	7219
13482	electrophysiology	130	5931
16213	gene linkage disequilibrium	130	5717
22467	medical literature	130	6230
30239	prospective study	130	6490
36305	synapse	130	5964
3137	affect	129	5842
3912	amygdala	129	7543
4124	animalia	129	5396
4367	anticonvulsants	129	8837
12698	drug choice	129	7552
13889	enzyme inhibition	129	7236
18908	hypothalamus	129	6627
30892	psychoses, substance-induced	129	4649
35367	spiperone	129	5714
35860	structure-activity relationship	129	5826
12305	dopamine agonists	128	6702
15096	fever	128	9786
37951	trihexyphenidyl	128	6954
9142	clinical effectiveness	127	7516
18011	histamine	127	6044
9807	compulsion	126	6468
14510	exercise	126	8040
17374	hamilton scale	126	6254
17622	heart palpitation	126	10197
29793	pregabalin	126	8924
31396	quinolones	126	6397
31732	receptor gene	126	4519
1186	4 iodo 2,5 dimethoxyamphetamine	125	5450
2920	adjuvant therapy	125	8903
14501	executive function	125	6452
22725	mental deficiency	125	6722
4865	area under the curve	124	8055
10863	cytokine	124	6918
25010	nausea and vomiting	124	10388
25612	neuropathic pain	124	8857
10492	cross-sectional studies	123	5927
15024	fenfluramine	123	5610
19708	insulin	123	6648
28574	phenobarbital	123	8626
31608	rash	123	10421
21987	magnetic resonance imaging	122	5631
25146	nerve cell differentiation	122	6514
25633	neuropharmacology	122	6131
31767	receptor subtype	122	5106
31859	receptors, n-methyl-d-aspartate	122	5629
1140	4 aminobutyric acid receptor	121	5990
7466	cannabinoid	121	6591
11659	diagnostic imaging	121	5576
11909	diphenhydramine	121	8332
17931	high performance liquid chromatography	121	5398
22163	maprotiline	121	7325
23112	metoclopramide	121	7709
24721	n methyl dextro aspartic acid	121	5831
2128	8 chloro 2,3,4,5 tetrahydro 3 methyl 5 phenyl 1h 3 benzazepin 7 ol hydrogen maleate	120	5579
4472	antihypertensive agent	120	7269
5657	barbituric acid derivative	120	7542
12741	drug distribution	120	7862
18724	hyperlipidemia	120	8631
26325	normal human	120	4220
32447	reward	120	6338
38111	tumor necrosis factor	120	7118
7781	catatonia	119	6534
7804	catecholamine	119	4860
12993	dsm-iv	119	5858
15943	galactorrhea	119	8579
21111	lethargy	119	9595
25777	neurotransmitter receptor	119	5524
6362	biperiden	118	6146
9845	computer assisted tomography	118	6586
12470	dopaminergic activity	118	5862
12701	drug clearance	118	8081
12773	drug formulation	118	8005
17326	hallucinations	118	5068
17626	heart rate	118	8254
18931	hypothyroidism	118	9153
27615	paranoid schizophrenia	118	5237
33821	serotonin 3 antagonist	118	6464
36900	thalamus	118	5595
2553	acetylsalicylic acid	117	7879
8352	chemically induced	117	6144
9215	clinical trials as topic	117	7077
21179	levomepromazine	117	6984
25162	nerve degeneration	117	7078
32568	risk	117	5764
34238	sex factors	117	5364
35647	stereotypy	117	5827
35820	stroke	117	7761
3091	adverse drug reaction	116	6009
5233	attention deficit hyperactivity disorder	116	6877
6398	bipolar mania	116	8044
17940	high risk patient	116	6381
18312	hospital admission	116	7045
32756	ropinirole	116	8095
34988	social psychology	116	6025
1116	4 aminobutyric acid a receptor	115	5654
33925	serotonin brain level	115	4192
37007	thiazoles	115	5305
3682	alzheimer's disease	114	5594
6212	binding site	114	5375
6546	blood pressure	114	8057
9413	cocaine dependence	114	6867
9621	combination chemotherapy	114	7774
10286	cost effectiveness analysis	114	6617
12712	drug contraindication	114	8667
12734	drug development	114	5490
21441	lithium salt	114	7047
25067	negative symptoms	114	4402
37274	tiotixene	114	5909
37569	tranquilizer	114	6257
3887	amphetamine derivative	113	6855
8141	central nervous system stimulants	113	6321
10249	corticotropin	113	6126
12737	drug discovery	113	5594
14470	excitatory amino acid antagonists	113	4855
16192	gene expression regulation	113	5397
16437	genome-wide association study	113	5368
19727	insulin resistance	113	7396
24471	myoclonus	113	8481
25822	neutropenia	113	8860
29322	polymorphism	113	4092
38057	tryptophan hydroxylase	113	4951
5780	behavior change	112	5686
7002	brief psychiatric rating scale	112	5558
10842	cytochrome p450 3a4	112	7452
23771	molecular genetics	112	4814
28993	pirenzepine	112	4540
12686	drug binding	111	5227
12907	drug tolerance	111	6381
13604	emotional disorder	111	5821
14098	erectile dysfunction	111	8113
16156	gender	111	5859
25930	nicotinic receptor	111	5718
26872	omega 3 fatty acid	111	7099
30238	prospective studies	111	5246
30765	psychoeducation	111	6928
35567	startle reaction	111	4257
4171	anorexia nervosa	110	5546
12176	dna methylation	110	5593
15439	follow-up studies	110	4847
18768	hyperthermia	110	7956
28321	personalized medicine	110	6653
30622	psilocybine	110	5294
3321	alcohol abuse	109	6070
3873	ampa receptor	109	5839
5684	basal ganglion	109	5520
10771	cyproheptadine	109	6240
11529	developmental disorder	109	6568
12799	drug industry	109	5192
12847	drug protein binding	109	6925
16088	gastrointestinal disease	109	7725
23869	monoaminergic system	109	5391
33422	sedative agent	109	6079
6746	bradycardia	108	9352
10254	corticotropin releasing factor	108	5827
17591	heart disease	108	7829
22445	medical decision making	108	5798
34145	serotoninergic transmission	108	4682
35948	substantia nigra	108	5695
5124	asthenia	107	9411
14360	euphoria	107	7666
21560	long term potentiation	107	5991
25316	neuroanatomy	107	5187
31567	randomized controlled trials as topic	107	6583
911	3,4 methylenedioxymethamphetamine	106	5337
19285	impulse control disorder	106	6813
21148	leukopenia	106	9218
21213	libido disorder	106	8698
24356	muscle rigidity	106	7918
28531	phase 2 clinical trial (topic)	106	6075
30787	psychologic assessment	106	5754
2678	acute disease	105	5009
6641	body weight gain	105	6551
12751	drug dose regimen	105	7283
21261	ligand binding	105	5026
27685	paresthesia	105	9679
28495	pharmacology	105	5999
37887	triacylglycerol	105	6491
3971	analgesic agent	104	6857
11551	dexamethasone	104	6984
21259	ligand	104	5090
25208	nervous system inflammation	104	6601
28515	pharmacotherapy	104	6527
28533	phase 3 clinical trial (topic)	104	5948
39223	warfarin	104	7855
10722	cycloserine	103	6371
11103	daytime somnolence	103	7433
16637	glucocorticoid	103	6201
20084	intraperitoneal drug administration	103	3536
21086	leptin	103	5674
3767	amine oxidase (flavin containing) isoenzyme a	102	4924
9199	clinical research	102	5312
13088	dyskinesia, drug-induced	102	4179
19227	immunohistochemistry	102	4355
21272	ligands	102	4809
23507	mini mental state examination	102	5770
24010	motivation	102	5085
24948	narcolepsy	102	7171
28155	pergolide	102	6653
31160	pyramidal nerve cell	102	4633
38772	ventral tegmentum	102	5073
7290	calcium channel blocking agent	101	6265
12804	drug interaction	101	6238
12924	drug utilization	101	6094
22993	methadone	101	6803
28942	pindolol	101	5439
31066	puerperal depression	101	5632
37814	treatment failure	101	5836
4313	antibiotic agent	100	6322
8906	chronic pain	100	6714
11158	decision making	100	5064
26278	noradrenergic system	100	5112
30671	psychiatric disorders	100	5055
31726	receptor density	100	4047
32143	remoxipride	100	4640
33910	serotonin agents	100	4644
3326	alcohol consumption	99	5971
3868	amoxapine	99	5578
7698	cariprazine	99	5718
10627	cyclic amp	99	4875
19175	immune response	99	6052
20726	kynurenine	99	4947
25719	neurosis	99	5178
33771	serotonin 1b receptor	99	5285
34139	serotoninergic nerve cell	99	4536
37843	treatment resistant depression	99	5823
2999	adrenalin	98	4364
3531	alpha adrenergic receptor	98	4844
5230	attention deficit disorder with hyperactivity	98	5503
7719	carrier proteins	98	3696
8636	cholesterol blood level	98	6895
17167	guanfacine	98	6668
29977	primary medical care	98	5974
30450	protein protein interaction	98	4913
37332	tobacco dependence	98	5934
7467	cannabinoid 1 receptor	97	5188
8684	cholinergic system	97	5404
16215	gene locus	97	4302
17372	hamilton depression rating scale	97	4803
19358	increased appetite	97	8047
19437	indoles	97	3462
33312	scopolamine	97	5904
35600	statistical significance	97	4121
8633	cholesterol	96	5375
9057	classification	96	4983
17180	guanine nucleotide binding protein	96	4389
22642	membrane glycoproteins	96	3813
3988	anamnesis	95	4836
7676	cardiovascular risk	95	6403
9921	conduct disorder	95	6267
19864	interleukin 1beta	95	5746
21015	learning disorder	95	5723
22662	membrane transport proteins	95	3797
23249	microglia	95	5819
23425	midazolam	95	6601
32064	regulatory mechanism	95	4632
33614	sensory gating	95	4679
35004	social support	95	6179
11282	delusional disorder	94	5367
11631	diagnosis	94	4079
11709	dibenzothiazepines	94	4526
15457	food intake	94	5712
16019	gamma-aminobutyric acid	94	4084
17941	high risk population	94	5318
18496	human experiment	94	3347
20570	ketoconazole	94	7336
22762	mental instability	94	6482
25641	neurophysiology	94	4455
31069	puerperal psychosis	94	4686
36046	suicide, attempted	94	3715
5473	avoidance behavior	93	4256
9206	clinical study	93	3904
10820	cytochrome p450 1a2	93	5977
11584	dextromethorphan	93	6770
29719	prazosin	93	4989
36530	tandospirone	93	4785
36815	testosterone	93	5416
38194	tyrosine 3 monooxygenase	93	4695
39129	volinanserin	93	5148
6322	biomarkers	92	4467
12148	dna	92	4056
12822	drug metabolite	92	4862
17603	heart infarction	92	7837
22988	metformin	92	5919
30721	psychiatric treatment	92	4401
32315	restless legs syndrome	92	6195
5415	autonomic dysfunction	91	6171
6840	brain injury	91	4660
9537	cohort studies	91	4533
12123	dizocilpine maleate	91	3710
22568	melancholia	91	4517
25617	neuropeptide	91	4455
37778	traumatic brain injury	91	5859
38355	united kingdom	91	5401
4768	apoptosis	90	5710
12390	dopamine metabolism	90	3999
12675	drug administration schedule	90	4313
12863	drug resistance	90	4371
13672	endocannabinoid	90	4839
18928	hypothesis	90	4031
20006	intestine flora	90	5363
22297	maximum plasma concentration	90	6018
24312	muscarinic m1 receptor	90	4841
27570	paracetamol	90	6612
30439	protein phosphorylation	90	4913
33207	schizoidism	90	3274
3204	agents interacting with transmitter, hormone or drug receptors	89	4268
6277	biogenic monoamines	89	4039
6849	brain mapping	89	3763
8122	central nervous system agents	89	4700
9635	combined modality therapy	89	5153
12514	dorsal raphe nucleus	89	4368
14797	falling	89	6334
14940	fear	89	5078
22932	metabotropic receptor	89	4729
27376	oxytocin	89	4887
31277	qt interval	89	6469
32249	respiration depression	89	7508
34269	sexual behavior	89	5481
1379	5 hydroxytryptophan	88	3724
3189	age distribution	88	4837
4485	antimanic agents	88	5030
5582	baclofen	88	5996
6989	brexpiprazole	88	5016
15906	gabaergic transmission	88	4475
16674	glucose metabolism	88	4481
19943	interneuron	88	4184
22418	medial prefrontal cortex	88	4184
22936	metabotropic receptor 2	88	3916
25204	nervous system diseases	88	5035
33898	serotonin 6 antagonist	88	4931
35593	statistical analysis	88	3715
8190	cerebellum	87	4093
12283	dopamine 2 receptor stimulating agent	87	4850
12761	drug eruption	87	8005
14399	evidence based practice	87	5077
26536	nucleotide sequence	87	3757
27311	oxazepam	87	5704
27844	patient counseling	87	5951
37428	torsade des pointes	87	6684
3726	amenorrhea	86	6346
4412	antidepressive agents, tricyclic	86	4228
8976	cingulate gyrus	86	4216
25790	neurotransmitters	86	3451
27047	oral contraceptive agent	86	5925
27229	osteoporosis	86	7132
32661	rna, messenger	86	3555
33763	serotonin 1a antagonist	86	4526
33783	serotonin 2 agonist	86	3951
33790	serotonin 2a agonist	86	3966
3231	agomelatine	85	5562
4243	anti-anxiety agents	85	4653
5752	beck depression inventory	85	4517
7852	caucasian	85	4053
12052	disorientation	85	5646
20345	isoxazoles	85	3701
23815	molindone	85	5205
25709	neuroscience	85	3693
28311	personality	85	4533
33811	serotonin 2c antagonist	85	4400
35652	steroid	85	5400
35797	stress, psychological	85	4090
5433	autoradiography	84	3618
6846	brain level	84	3566
11638	diagnostic accuracy	84	4593
15398	fluvoxamine maleate	84	5329
16448	genotype environment interaction	84	4312
20095	intravenous drug administration	84	3446
33808	serotonin 2b receptor	84	4501
35902	subcutaneous drug administration	84	2967
37960	trimipramine	84	5292
38009	tropisetron	84	4237
4200	anterior cingulate	83	4521
7243	caffeine	83	5964
8240	cerebrovascular disease	83	5833
8353	chemically induced disorder	83	4259
12091	distress syndrome	83	5240
18213	homeostasis	83	4850
19770	intellectual impairment	83	4685
22807	mescaline	83	3774
23841	monoamine oxidase	83	2834
25240	neu differentiation factor	83	4002
30181	promethazine	83	5448
31506	radioisotope	83	2849
33857	serotonin 5-ht2 receptor antagonists	83	3763
37127	thrombocytopenia	83	7780
3512	alpha 2 adrenergic receptor	82	4370
3945	amyotrophic lateral sclerosis	82	5019
4531	antiparkinson agents	82	4735
5127	asthma	82	5779
7167	butyrophenone derivative	82	4396
14337	etiology	82	2678
25267	neural pathways	82	3765
29459	positron-emission tomography	82	3888
31513	radioligand assay	82	3540
34927	social aspect	82	4260
12324	dopamine brain level	81	3675
12567	down regulation	81	4202
12768	drug exposure	81	4634
18378	hostility	81	4531
18512	human immunodeficiency virus infection	81	5511
19485	infection	81	6498
25955	nightmare	81	6520
27260	outpatient	81	3810
30578	pruritus	81	7094
31956	recurrence	81	3633
4478	antiinflammatory activity	80	5255
6924	brain-derived neurotrophic factor	80	3746
7183	c reactive protein	80	4891
12646	droperidol	80	5370
15862	gaba	80	3901
16178	gene deletion	80	4032
18042	histamine receptor	80	4341
19178	immune system	80	4485
26964	opiate addiction	80	5217
28840	physical examination	80	4738
35676	stevens johnson syndrome	80	7671
36361	syncope	80	6603
39031	visual impairment	80	5742
4411	antidepressive agents, second-generation	79	3472
5131	astrocyte	79	5059
6747	bradykinesia	79	5522
6894	brain stem	79	3772
7856	caudate nucleus	79	4143
8347	chemical structure	79	4012
15133	fibromyalgia	79	5697
17016	granisetron	79	4382
25506	neurologic examination	79	4249
33836	serotonin 4 receptor	79	4023
34064	serotonin uptake	79	3061
37212	tiagabine	79	5482
38801	verbal memory	79	4209
6888	brain size	78	3927
7265	calcium	78	3926
9182	clinical outcome	78	4051
11903	dipeptidyl carboxypeptidase inhibitor	78	5299
12802	drug inhibition	78	4659
18647	hydroxymethylglutaryl coenzyme a reductase inhibitor	78	5609
20253	irritable colon	78	4396
22456	medical history	78	4736
23715	models, biological	78	3468
25924	nicotinic agent	78	4003
37077	thought disorder	78	4386
3025	adrenergic receptor	77	3963
3402	algorithm	77	4049
11787	diffuse lewy body disease	77	4837
12817	drug marketing	77	4331
13364	ejaculation disorder	77	6691
15940	gait disorder	77	5845
28585	phenothiazine	77	5337
34005	serotonin receptors	77	3053
34974	social isolation	77	3936
38112	tumor necrosis factor alpha	77	4315
38193	tyrosine	77	3472
5368	autistic disorder	76	3300
8047	cell proliferation	76	4243
13265	edema	76	6705
15421	folic acid	76	4979
20791	laboratory test	76	4581
23802	molecular structure	76	3721
26652	observational study	76	3795
35602	statistics	76	4107
36930	theoretical study	76	2137
36979	therapy effect	76	4146
4500	antineoplastic agent	75	5455
6393	bipolar ii disorder	75	4428
8564	chlordiazepoxide	75	4611
10242	corticosterone	75	4396
12781	drug hypersensitivity	75	6211
14225	estradiol	75	4239
16205	gene interaction	75	3921
24467	myocarditis	75	6174
31512	radioligand	75	3577
31866	receptors, neurotransmitter	75	3594
31896	recognition	75	3604
32583	risk reduction	75	4503
3793	amino acid sequence	74	3886
4943	arousal	74	3790
6156	bifeprunox	74	4215
12765	drug excretion	74	5447
24328	muscarinic receptor blocking agent	74	4814
27060	orbital cortex	74	3839
28267	perospirone	74	3463
29853	prenatal exposure	74	4449
31302	quantitative analysis	74	3516
38824	very elderly	74	4157
5275	atypical antipsychotic	73	3774
9615	coma	73	6516
10123	convulsion	73	5544
27849	patient education	73	4561
28827	physical activity	73	4432
33591	sensitivity and specificity	73	3966
33760	serotonin 1 receptor	73	3385
36720	temporal lobe	73	3308
37888	triacylglycerol blood level	73	5449
2592	acoustic stimulation	72	2618
4519	antioxidant	72	4338
5767	bedtime dosage	72	5040
6776	brain blood flow	72	3576
8963	cimetidine	72	4870
14027	epinephrine	72	4108
14338	etiracetam	72	5263
14405	evidence-based medicine	72	4723
21872	lysergic acid diethylamide	72	2890
23479	milnacipran	72	4731
23753	molecular biology	72	3342
27867	patient referral	72	4024
28126	perception	72	3350
29956	priapism	72	5954
33810	serotonin 2c agonist	72	3810
3926	amyloid beta protein	71	3912
4782	appetite	71	4645
5388	autoimmune disease	71	4690
6293	biological markers	71	3127
6951	breast cancer	71	5960
8682	cholinergic receptor stimulating agent	71	4185
13404	electrocardiogram	71	4305
20028	intoxication	71	3783
24894	naloxone	71	4284
30839	psychomotor disorder	71	4885
31188	pyridines	71	3082
32500	rheumatoid arthritis	71	5159
33333	screening	71	3712
33516	self report	71	3462
36927	theophylline	71	5254
6853	brain metabolism	70	3521
11822	digoxin	70	5086
12724	drug delivery system	70	4860
16003	gamma interferon	70	4333
16197	gene function	70	3240
16641	glucocorticoid receptor	70	4169
20673	knockout mouse	70	3246
21591	longitudinal study	70	3443
27871	patient safety	70	4389
29892	preschool child	70	3839
32491	rhabdomyolysis	70	5063
38420	urea	70	3335
39170	vortioxetine	70	4434
2959	adolescents	69	3906
4062	anger	69	3998
12704	drug combination	69	3846
16374	genetic screening	69	3442
18800	hypnotic sedative agent	69	3884
24040	motor performance	69	3544
25490	neuroleptics	69	2684
25987	nitric oxide	69	3823
29359	polysomnography	69	4191
30372	protein interaction	69	3633
33985	serotonin receptor affecting agent	69	3147
36482	tacrine	69	4180
37564	tramadol	69	5105
3583	alpha tocopherol	68	4241
6219	binge eating disorder	68	4232
6903	brain tissue	68	2875
6960	breast feeding	68	5144
7213	cabergoline	68	4451
7553	carbidopa plus levodopa	68	4633
7791	catechol methyltransferase inhibitor	68	4757
11743	diet supplementation	68	4695
13155	early diagnosis	68	3992
18701	hyperhidrosis	68	6061
19276	impotence	68	5830
19547	information processing	68	3028
20392	japan	68	2760
23526	minocycline	68	4108
29285	polydipsia	68	5195
34866	smoking cessation	68	4163
36764	teratogenicity	68	5130
37236	time	68	3021
37293	tissue distribution	68	3619
38569	vagus nerve stimulation	68	4413
1178	4 hydroxy 3 methoxyphenylethylene glycol	67	2270
3192	age of onset	67	3094
3895	amphetamines	67	2620
4032	anemia	67	5866
7458	cannabidiol	67	3844
8674	cholinergic receptor	67	3681
9622	combination drug therapy	67	3663
12764	drug evaluation, preclinical	67	3522
12914	drug treatment failure	67	4527
14817	family	67	3838
15708	functional connectivity	67	3147
17040	gray matter	67	3419
20606	kidney failure	67	5623
23462	mild cognitive impairment	67	4051
23911	montgomery asberg depression rating scale	67	3873
24785	n,n dimethyltryptamine	67	2712
25596	neuronal plasticity	67	3261
28584	phenomenology	67	3058
30288	protein	67	3375
30308	protein blood level	67	3951
31660	reaction time	67	2759
33939	serotonin metabolism	67	2880
37992	tritium	67	2792
39021	visual disorder	67	5563
905	3,4 dihydroxyphenylacetic acid	66	2776
2550	acetylcysteine	66	4349
3774	amino acid	66	3171
5681	basal ganglia diseases	66	3182
8746	chromatography, high pressure liquid	66	2499
11290	delusions	66	2689
11739	diet	66	3534
11933	disability	66	4044
14848	family therapy	66	3787
23962	morning dosage	66	5573
25700	neuropsychology	66	3113
30480	protein structure	66	3415
30859	psychopathy	66	3446
31829	receptors, dopamine d3	66	3052
31856	receptors, metabotropic glutamate	66	3102
32944	safety	66	4043
33856	serotonin 5-ht2 receptor agonists	66	2984
38473	urine incontinence	66	5492
4351	anticholinergic syndrome	65	5586
5485	awareness	65	3896
6473	bleeding	65	5661
8491	childhood disease	65	4208
11066	data base	65	3416
16392	genetic variation	65	3304
20637	kinetics	65	2321
24421	myalgia	65	5922
32553	rigidity	65	4090
35000	social status	65	3595
36702	temazepam	65	4893
36716	temporal cortex	65	3123
28	(3 chlorophenyl)piperazine	64	2890
4479	antiinflammatory agent	64	3782
6296	biological model	64	2986
11497	desvenlafaxine	64	4600
13407	electrocardiography	64	3535
18709	hypericum perforatum extract	64	4680
23105	methysergide	64	3093
23920	mood change	64	4300
25178	nerve growth factor	64	3487
28037	pemoline	64	4355
31700	receptor	64	2890
33245	schizophrenia, paranoid	64	2382
33470	selective serotonin reuptake inhibitors	64	3091
35289	speech disorder	64	5187
39698	zonisamide	64	4778
1446	5-ht	63	2494
3968	analgesia	63	3532
4435	antiemetic agent	63	4252
9194	clinical protocol	63	3921
10137	coping behavior	63	4015
12301	dopamine agents	63	3388
12725	drug delivery systems	63	3746
13684	endocrine disease	63	4414
14384	evening dosage	63	4860
14584	exploratory behavior	63	2781
16323	genetic association studies	63	2795
22306	maze test	63	3187
22619	melperone	63	3644
25622	neuropeptide y	63	3378
26292	norclozapine	63	3447
27637	parasomnia	63	4471
28648	phobia	63	3777
29368	polyuria	63	5243
30209	prophylaxis	63	3620
30566	protriptyline	63	4358
31405	quinpirole	63	3169
31668	reactive oxygen metabolite	63	4048
34741	sleep disorders	63	3863
35780	stress disorders, post-traumatic	63	3233
37912	trichotillomania	63	3489
38790	verapamil	63	4201
39702	zopiclone	63	4611
4622	antisocial behavior	62	3242
6554	blood sampling	62	2755
9145	clinical evaluation	62	3539
11171	decreased appetite	62	5713
12102	disulfiram	62	4237
12409	dopamine receptor blocking	62	2921
12891	drug surveillance program	62	4720
13311	efficacy	62	3641
22952	metabotropic receptor agonist	62	3347
26245	nootropic agent	62	3440
30834	psychometry	62	3351
30932	psychosocial withdrawal	62	3311
36006	sudden death	62	4718
2943	adolescence	61	3516
4988	arthralgia	61	5795
9480	cognitive dysfunction	61	2857
9880	concentration response	61	2880
10827	cytochrome p450 2c19	61	3878
16200	gene identification	61	2738
17269	gynecomastia	61	5215
19243	immunoreactivity	61	2919
19419	indole derivative	61	2566
21254	lifestyle modification	61	4049
22810	mesencephalon	61	2985
23015	methionine	61	2697
25853	newborn	61	3053
29796	pregnancy complications	61	3358
31070	puerperium	61	3645
31772	receptor upregulation	61	2882
33597	sensorimotor function	61	2501
34782	sleep waking cycle	61	3788
35146	somatoform disorder	61	3482
36089	sumatriptan	61	3504
38907	vigabatrin	61	4310
6273	biogenic amine	60	2731
6610	body dysmorphic disorder	60	2803
6624	body mass index	60	2683
6771	brain atrophy	60	3425
6817	brain dysfunction	60	3066
11689	diaphoresis	60	4209
12060	disrupted in schizophrenia 1 protein	60	2813
12199	dna sequence	60	2902
12894	drug synergism	60	2557
17547	health survey	60	3543
17596	heart failure	60	5316
18663	hydroxyzine	60	4309
18716	hyperkinesia	60	4407
19987	interview	60	3087
21251	lifestyle	60	4288
22668	memory consolidation	60	3470
30837	psychomotor agitation	60	3197
31606	rasagiline	60	4418
31676	real time polymerase chain reaction	60	2763
33924	serotonin blood level	60	2156
34411	sibutramine	60	4003
37256	time to maximum plasma concentration	60	3888
39208	wakefulness	60	3173
39411	wistar rat	60	2730
2720	acute psychosis	59	3483
6499	blood and hemopoietic system	59	1369
7686	caregiver	59	3640
12546	dosulepin	59	4029
12808	drug intoxication	59	3939
12837	drug penetration	59	3767
15377	fluphenazine decanoate	59	2965
16481	geriatric patient	59	3931
16792	glutathione	59	3859
21474	liver failure	59	5475
23851	monoamine oxidase inhibitors	59	3037
25202	nervous system	59	2703
26999	oppositional defiant disorder	59	3730
28878	physiological stress	59	3267
30845	psychomotor retardation	59	3584
31581	raphe nucleus	59	3154
36381	synthesis	59	2746
37380	tomography, emission-computed	59	2217
3514	alpha 2 adrenergic receptor stimulating agent	58	3711
7109	bungarotoxin receptor	58	2873
11745	diet therapy	58	4497
17543	health status	58	3819
18915	hypothalamus hypophysis system	58	3086
22486	medical society	58	3478
23265	microrna	58	3435
23602	mitogen activated protein kinase	58	3119
25366	neurodegenerative diseases	58	3228
25795	neurotrophic factor	58	2731
27814	pathological gambling	58	3958
28860	physician	58	3880
29400	population research	58	2869
30119	progesterone	58	3248
30856	psychopathology	58	2743
31372	quinidine	58	4152
31728	receptor down regulation	58	3016
32079	reinforcement	58	3024
33758	serotonin 1 agonist	58	2800
36310	synapses	58	2618
36721	temporal lobe epilepsy	58	3345
5111	association	57	2128
7821	catecholamines	57	1891
7962	celecoxib	57	3731
9999	consciousness disorder	57	4254
11581	dextro serine	57	3127
13872	enzyme activation	57	2776
13959	epidemiological data	57	3414
13962	epidemiology	57	3379
17408	haplotypes	57	2147
17505	health care utilization	57	3485
17840	heritability	57	2692
18903	hypothalamo-hypophyseal system	57	2790
24217	multiinfarct dementia	57	3583
27258	outcomes research	57	2770
29544	postnatal depression	57	3162
29855	prenatal exposure delayed effects	57	2880
30071	prochlorperazine	57	3653
31836	receptors, g-protein-coupled	57	2756
34487	sildenafil	57	3936
34737	sleep deprivation	57	3113
2149	8-hydroxy-2-(di-n-propylamino)tetralin	56	2134
3559	alpha interferon	56	3562
4784	appetite disorder	56	3760
5359	autism spectrum disorder	56	3158
6493	blonanserin	56	3138
8022	cell membrane	56	2452
8904	chronic obstructive lung disease	56	4398
8944	cigarette smoking	56	3076
11014	daily life activity	56	3423
12519	dorsolateral prefrontal cortex	56	3226
12748	drug dose escalation	56	4264
13380	elderly care	56	3394
13726	endophenotype	56	2617
17459	head twitch	56	2474
17795	hepatitis c	56	4093
19469	infant	56	3154
23721	models, neurological	56	2284
25400	neuroendocrine system	56	2977
28242	peripheral neuropathy	56	4858
30389	protein kinase c	56	2790
31348	questionnaires	56	2395
31395	quinolone derivative	56	2838
33689	serine	56	2371
3031	adrenergic receptor stimulating agent	55	3345
3149	affective disorders, psychotic	55	1966
3882	amperozide	55	2204
3978	analogs and derivatives	55	2310
6634	body temperature	55	2880
7795	catechol o-methyltransferase	55	2755
8612	cholecystokinin	55	2668
11064	data analysis	55	2591
12286	dopamine 3 receptor blocking agent	55	3205
12729	drug derivative	55	2264
13104	dysphagia	55	4642
13108	dyspnea	55	4572
17893	heterozygote	55	2508
18752	hyperreflexia	55	4168
18828	hypoglycemia	55	4454
21331	linkage disequilibrium	55	2113
21342	liothyronine	55	3239
22506	medication compliance	55	3349
22905	metabolite	55	2878
24079	movement disorders	55	3064
28350	pet	55	2365
37181	thyroid hormone	55	3203
38636	variable number of tandem repeat	55	2217
38699	vasopressin	55	2915
2867	adenylate cyclase	54	2587
3795	amino acid substitution	54	2482
4421	antidiabetic agent	54	3438
5219	atropine	54	3339
5238	attention disturbance	54	3822
6812	brain diseases	54	2762
8918	chronic stress	54	3412
12108	diuretic agent	54	3551
13280	education	54	3307
13621	emotionality	54	2912
15032	fentanyl	54	3929
15486	forced swim test	54	2918
16346	genetic heterogeneity	54	2239
16354	genetic marker	54	2349
16386	genetic transcription	54	2805
16444	genomics	54	2770
17921	high density lipoprotein cholesterol	54	3365
18326	hospital discharge	54	2950
18984	icd-10	54	2758
19234	immunology	54	2614
19849	interleukin 10	54	3228
21303	limbic cortex	54	2812
23849	monoamine oxidase b inhibitor	54	3650
25957	nigroneostriatal system	54	2848
27491	palliative therapy	54	3762
31202	pyridoxine	54	3295
32191	reproducibility of results	54	2475
33590	sensitivity analysis	54	2445
33778	serotonin 1d receptor	54	2778
33849	serotonin 5-ht1 receptor agonists	54	2348
34423	side effects	54	3355
36405	systematic review (topic)	54	3294
36831	tetrabenazine	54	3450
37073	thorax pain	54	5243
38191	tyramine	54	3121
39563	yale brown obsessive compulsive scale	54	2507
39594	yohimbine	54	3191
2547	acetylcholinesterase	53	2919
2933	administration, oral	53	2593
3241	agoraphobia	53	3005
5898	benzamide derivative	53	2594
7118	buprenorphine	53	3799
7488	cannabinoids	53	2780
8685	cholinergic transmission	53	2895
11352	dentate gyrus	53	2564
12645	dronabinol	53	3214
14491	excitotoxicity	53	3218
15286	flu like syndrome	53	4568
15451	food drug interaction	53	4549
15492	forebrain	53	2611
15576	fragile x syndrome	53	3157
17789	hepatitis	53	5060
18598	hydrocortisone blood level	53	2541
19867	interleukin 2	53	2901
20723	kynurenic acid	53	2361
22203	mass spectrometry	53	2701
22759	mental hospital	53	2664
26774	off label drug use	53	3578
27873	patient selection	53	2772
28229	peripheral edema	53	4402
28811	phototherapy	53	2847
30624	psoriasis	53	4502
31056	publication	53	2990
31143	putamen	53	2500
32273	respiratory tract disease	53	4342
32542	rifampicin	53	4477
32557	riluzole	53	3359
37041	thiophenes	53	2450
1330	5 chloro n [4 methoxy 3 (1 piperazinyl)phenyl] 3 methyl 2 benzothiophenesulfonamide	52	2872
1900	6 chloro 5 methyl 1 [[2 [(2 methyl 3 pyridyl)oxy] 5 pyridyl]carbamoyl]indoline	52	2636
2474	acamprosate	52	3413
4173	anorgasmia	52	4470
7493	cannabis addiction	52	2804
8596	chlorprothixene	52	3407
9878	concentration loss	52	4463
11030	dantrolene	52	3290
11656	diagnostic error	52	2639
11661	diagnostic procedure	52	2924
12429	dopamine receptors	52	2357
13573	emergency ward	52	3352
20810	lactation	52	3425
25120	neoplasm	52	3577
26259	noradrenalin transporter	52	2891
26404	novel object recognition test	52	2708
30043	probiotic agent	52	3156
30555	proton nuclear magnetic resonance	52	2675
33986	serotonin receptor agonists	52	2455
34643	skin disease	52	5021
35234	spatial memory	52	2853
36066	sulfonamide	52	2957
39355	white matter	52	2760
2916	adjustment disorder	51	2893
8075	cell survival	51	3120
9998	consciousness	51	2000
10021	consultation	51	2577
10497	crossover procedure	51	2152
12228	docosahexaenoic acid	51	3183
12700	drug classification	51	3421
13066	dysbindin	51	2377
16544	ginkgo biloba extract	51	3817
16787	glutamine	51	2685
17499	health care quality	51	3457
20266	ischemic heart disease	51	3755
21470	liver dysfunction	51	4960
24347	muscle hypertonia	51	3870
25652	neuroprotective agent	51	2932
26502	nuclear magnetic resonance spectroscopy	51	2840
26574	nursing home	51	2738
26949	open study	51	2791
27532	pancreatitis	51	4988
27834	patient attitude	51	2603
30156	prolactin release	51	2289
30310	protein c fos	51	2485
30523	proteinase inhibitor	51	3874
30843	psychomotor performance	51	2375
31211	pyrimidines	51	2348
32006	reference values	51	1725
34729	sleep apnea syndrome	51	3811
35603	statistics and numerical data	51	2713
37855	treatment withdrawal	51	3668
37868	treatment-resistant schizophrenia	51	2526
2580	acne	50	4695
3644	alternative medicine	50	3458
6843	brain ischemia	50	3569
7393	cancer	50	3237
7718	carrier protein	50	2329
8129	central nervous system diseases	50	2779
8231	cerebrospinal fluid analysis	50	2435
10638	cyclic amp responsive element binding protein	50	2777
10865	cytokine production	50	3011
12001	disease progression	50	2923
13812	entacapone	50	3929
15347	fluorobenzenes	50	1854
15659	frontotemporal dementia	50	3109
16233	gene sequence	50	2345
16281	general practitioner	50	2813
16561	glaucoma	50	4329
19070	illicit drug	50	2870
22835	mesoridazine	50	3027
22852	meta-analysis	50	1798
22939	metabotropic receptor 3	50	2502
25134	nephrotoxicity	50	4358
28186	perinatal period	50	2564
31882	receptors, serotonin, 5-ht3	50	2118
33269	schizotypal personality disorder	50	2466
34382	short term memory	50	2557
34942	social cognition	50	2646
35610	steady state	50	3119
2874	adhd	49	2682
3216	aggressiveness	49	2868
4520	antioxidant activity	49	3456
5474	avoidance learning	49	1968
8604	cho cells	49	2417
8689	cholinesterase inhibitors	49	3007
10399	creatine kinase	49	2796
10875	cytology	49	2036
12451	dopamine uptake inhibitor	49	2909
13336	eglumetad	49	2690
13378	elderly	49	3122
14166	erythromycin	49	4051
14261	eszopiclone	49	3270
14412	evoked auditory response	49	2009
15349	fluorodeoxyglucose f 18	49	2730
18998	icosapentaenoic acid	49	2781
19236	immunomodulation	49	2657
19773	intelligence quotient	49	2929
20105	intron	49	1896
21419	lisuride	49	3082
22043	malaise	49	4558
22755	mental health services	49	2311
24403	mutation	49	2297
26092	nociception	49	3049
26945	open field test	49	2650
27261	outpatient care	49	2345
29689	practice guidelines as topic	49	2969
29749	preclinical study	49	2800
30788	psychologic test	49	2440
31881	receptors, serotonin, 5-ht2	49	2103
32204	research	49	1838
35816	striatum	49	1972
37354	tolcapone	49	3574
37899	triazolam	49	3252
38038	tryptamine	49	1894
38592	validation process	49	2145
3153	affective psychosis	48	2137
3492	alopecia	48	4165
6276	biogenic amines	48	1711
7998	cell differentiation	48	2662
11375	depersonalization	48	3308
11670	diagnostic test	48	3036
11673	diagnostic value	48	2589
12258	domperidone	48	3144
13166	early intervention	48	2545
13590	emonapride	48	2427
13622	emotions	48	2024
14052	eplivanserin	48	2900
14387	event related potential	48	1901
16439	genomic dna	48	2070
17300	habituation	48	2146
17497	health care policy	48	2548
17817	herbaceous agent	48	3281
18023	histamine h1 receptor antagonist	48	2830
18757	hypersexuality	48	3434
22681	memory, short-term	48	2241
24141	mu opiate receptor	48	2609
24955	narcotic analgesic agent	48	2994
26884	omeprazole	48	3731
28362	pethidine	48	3360
28884	physostigmine	48	2700
29038	placebos	48	1907
31566	randomized controlled trials	48	2612
32562	rimonabant	48	3075
36364	syndrome	48	1873
37534	tracer	48	2399
38466	urine	48	1769
1094	4 amino 2 oxabicyclo[3.1.0]hexane 4,6 dicarboxylic acid	47	2642
3098	adverse effects	47	2737
3538	alpha adrenergic receptor stimulating agent	47	2851
4045	anesthetic agent	47	3087
4115	animal models	47	2115
4360	anticoagulant agent	47	3370
4753	apolipoprotein e	47	2500
5343	australia	47	2380
6256	biochemistry	47	2062
8440	child abuse	47	2409
10188	coronavirus disease 2019	47	2613
10816	cytochrome p-450 enzyme system	47	2714
10873	cytokines	47	2312
14976	feeding behavior	47	2781
15308	flumazenil	47	3145
15734	functional neuroimaging	47	2233
16092	gastrointestinal hemorrhage	47	3764
16777	glutamatergic transmission	47	2553
17495	health care personnel	47	2533
20335	isotope labeling	47	2223
21066	length of stay	47	2353
21348	lipid	47	2894
21352	lipid blood level	47	3174
22480	medical record review	47	2634
23700	model	47	1920
23804	molecular targeted therapy	47	2565
26970	opiate receptor	47	2578
27339	oxidopamine	47	2011
27614	paranoid psychosis	47	2156
28129	perception disorder	47	2479
28932	pilot study	47	2218
29780	prednisone	47	3264
30295	protein analysis	47	2731
30385	protein kinase b	47	2451
34239	sex hormone	47	2309
34718	slc6a4 protein, human	47	1995
35485	ssri	47	2359
37175	thyroid disease	47	3917
37391	tonic clonic seizure	47	3126
592	2,3,4,5 tetrahydro 7,8 dihydroxy 1 phenyl 1h 3 benzazepine	46	2460
2434	absence of side effects	46	2888
3034	adrenergic system	46	2366
3537	alpha adrenergic receptor blocking agent	46	2867
5059	asian continental ancestry group	46	1738
6213	binding sites	46	1846
7551	carbidopa	46	2987
9128	clinical decision making	46	3552
12568	down syndrome	46	2358
13990	epigenesis, genetic	46	2437
15702	functional assessment	46	2262
16498	gerontopsychiatry	46	2647
17357	haloperidol decanoate	46	2355
17533	health program	46	2761
17614	heart muscle conduction disturbance	46	3663
18758	hypersomnia	46	3499
18927	hypothermia	46	3610
20170	ion channel	46	2249
20208	ipsapirone	46	2412
21193	lewy body	46	2344
21362	lipid metabolism	46	2659
21555	long qt syndrome	46	3066
22710	menstrual cycle	46	3026
23114	metoprolol	46	2987
23447	mifepristone	46	2714
23765	molecular dynamics	46	2182
25259	neural inhibition	46	1800
25800	neurotrophin	46	2391
27748	partial agonist	46	2252
27796	patent	46	2434
28882	physiotherapy	46	3494
29837	premenstrual syndrome	46	2133
31830	receptors, dopamine d4	46	2064
35942	substance withdrawal syndrome	46	2818
36843	tetrahydrocannabinol	46	2650
37200	thyrotropin	46	2620
39617	zacopride	46	2070
39621	zaleplon	46	3268
3277	akathisia, drug-induced	45	1965
3803	amino acids	45	1828
3989	anandamide	45	2176
5740	bdnf	45	2036
5873	bemesetron	45	2083
6526	blood dyscrasia	45	3928
6535	blood level	45	1901
8030	cell migration	45	2640
8534	chinese	45	1630
12688	drug binding site	45	2473
13778	energy metabolism	45	2536
16337	genetic disorder	45	2241
22766	mental performance	45	2244
22828	mesolimbic dopaminergic system	45	2170
22896	metabolic syndrome	45	2173
23774	molecular imaging	45	2009
24437	mydriasis	45	3765
26966	opiate antagonist	45	2969
27770	parvalbumin	45	2076
28529	phase 1 clinical trial (topic)	45	2691
31880	receptors, serotonin, 5-ht1	45	1962
31957	recurrence risk	45	2700
32109	reliability	45	2010
32436	reverse transcription polymerase chain reaction	45	2045
33840	serotonin 5 receptor	45	2207
34780	sleep time	45	2795
35047	sodium chloride	45	2253
36140	support, u.s. gov't, non-p.h.s.	45	1338
36587	tau protein	45	2800
37209	thyroxine	45	2467
37213	tianeptine	45	2635
1142	4 aminobutyric acid receptor stimulating agent	44	2538
3513	alpha 2 adrenergic receptor blocking agent	44	2669
3768	amine oxidase (flavin containing) isoenzyme b	44	2339
3791	amino acid receptor blocking agent	44	2062
5118	association study	44	1398
5840	behavioral symptoms	44	2429
6358	biosynthesis	44	1977
7470	cannabinoid 2 receptor	44	2515
7477	cannabinoid receptor	44	2390
7566	carbon 11	44	2192
8991	ciprofloxacin	44	3370
10705	cyclooxygenase 2 inhibitor	44	3043
11138	death	44	2888
11990	disease marker	44	2642
12908	drug toxicity	44	2632
14555	experimental model	44	2210
17479	health care access	44	2742
18708	hypericum perforatum	44	3008
19781	intensive care unit	44	2807
21142	leukocytosis	44	3466
21186	levothyroxine	44	2610
21537	logistic models	44	2061
22438	medical assessment	44	2429
22448	medical education	44	2113
22670	memory disorders	44	2018
23800	molecular sequence data	44	1830
26035	nmda	44	2073
29018	pituitary-adrenal system	44	2221
30488	protein synthesis	44	2514
30535	proteomics	44	2425
31044	public health	44	2254
31524	radiopharmaceutical agent	44	2220
32503	rhinitis	44	4116
33335	screening test	44	3155
38440	urinalysis	44	2640
38458	urinary tract infection	44	3329
39337	western blotting	44	2073
5042	ascorbic acid	43	2280
5330	auditory stimulation	43	1707
6215	binding, competitive	43	1737
6819	brain electrophysiology	43	1970
6829	brain hemorrhage	43	4048
7202	c57bl mouse	43	2076
12063	disruptive behavior	43	2784
14297	ethnicity	43	2544
14364	europe	43	2536
16097	gastrointestinal microbiome	43	2242
16355	genetic markers	43	1691
16468	gepirone	43	2304
16568	glia cell	43	2338
18027	histamine h2 receptor antagonist	43	2847
18255	homozygosity	43	1772
18969	ibuprofen	43	2944
19921	international classification of diseases	43	2245
21526	locus ceruleus	43	2247
21677	lsd	43	1670
23832	monoamine metabolism	43	1765
24368	muscle weakness	43	3774
25430	neurogenesis	43	1993
25835	new drug	43	2196
28564	phenethylamine	43	1772
29942	prevention	43	2051
31080	pulmonary hypertension	43	3030
31386	quinolinic acid	43	2308
31897	recognition (psychology)	43	2028
33444	seizures	43	2541
34438	sigma opiate receptor	43	1848
36067	sulfonamides	43	1930
1646	5-ht<sub>2a</sub> receptor	42	1554
3278	akinesia	42	2565
5419	autonomic nervous system	42	2009
5678	basal ganglia	42	1842
6857	brain monoamine	42	1640
8532	china	42	1773
8877	chronic drug administration	42	2413
9915	conditioning	42	1914
10431	cricetinae	42	1986
11794	diffusion tensor imaging	42	2319
11989	disease management	42	2600
12278	dopamine 1 receptor stimulating agent	42	2312
12706	drug comparison	42	1451
16744	glutamate receptor antagonist	42	2254
17104	growth hormone	42	1783
17517	health insurance	42	2221
18434	htr2a gene	42	1843
19656	inositol	42	2494
19842	interleukin 1	42	2491
20071	intramuscular drug administration	42	1719
21136	leukocyte count	42	2804
22473	medical practice	42	2055
22653	membrane protein	42	2166
23756	molecular cloning	42	2258
24285	multivariate analysis	42	1912
24735	n methyl dextro aspartic acid receptor stimulating agent	42	2373
25653	neuroprotective agents	42	2498
27278	ovary polycystic disease	42	3526
29974	primary health care	42	2949
33016	sample size	42	1989
34740	sleep disordered breathing	42	3043
34767	sleep quality	42	2580
749	3 [2 [2 (4 methyl 1 piperidinyl)ethyl] 1 pyrrolidinesulfonyl]phenol	41	2312
4308	antiarrhythmic agent	41	3048
6861	brain nerve cell	41	2161
7868	cause of death	41	2754
8003	cell function	41	2236
9147	clinical examination	41	2647
10268	cortisol	41	1547
10717	cyclophosphamide	41	3109
10829	cytochrome p450 2c9	41	2714
13222	ecg abnormality	41	4153
13847	environment	41	1865
14037	episodic memory	41	2234
14291	ethnic difference	41	2167
15384	flushing	41	3793
18093	history	41	1875
19815	interferon	41	2687
19953	interpersonal communication	41	2478
20359	italy	41	2482
23763	molecular docking	41	1892
23937	mood stabilizers	41	2789
27067	orexin	41	2840
28315	personality disorders	41	1876
28931	pilot projects	41	1793
29851	prenatal drug exposure	41	3090
31997	reelin	41	2137
33356	seasonal affective disorder	41	2240
34190	setoperone	41	1487
34545	single photon emission computed tomography	41	2156
34582	sinus tachycardia	41	3365
36835	tetracyclic antidepressant agent	41	2223
37381	tomography, emission-computed, single-photon	41	1828
37590	transcranial direct current stimulation	41	2205
39072	vitamin d	41	3068
39091	vivid dream	41	3433
39329	wellbeing	41	2220
3403	algorithms	40	2100
3480	allosterism	40	1942
7498	cannabis use	40	1892
11639	diagnostic agent	40	1645
12537	dose time effect relation	40	1834
13502	elevated plus maze test	40	2158
16866	glycogen synthase kinase 3beta	40	2109
17316	hair loss	40	3612
18103	history, 20th century	40	1955
18526	human relation	40	2158
18779	hypertriglyceridemia	40	2736
19706	insula	40	2164
19885	interleukin 8	40	2240
20044	intracellular signaling	40	1944
20866	language disability	40	2565
22716	menstruation disorder	40	3386
[truncated: 6,739 more rows]

## Sheet: Authors
id	author	documents	citations	total link strength
85	abi-dargham, anissa	17	1246	15
111	abramova, l.i.	10	127	21
188	adell, albert	10	680	5
263	aghajanian, george k.	10	1505	13
395	akhondzadeh, shahin	11	388	3
575	alfimova, m.v.	11	91	24
894	andrade, chittaranjan	13	289	0
900	andreassen, ole a.	11	1244	7
1071	arango, celso	10	822	7
1202	arranz, m.j.	12	1508	12
1220	artigas, francesc	21	2202	6
1668	baldessarini, ross j.	11	986	2
1675	baldwin, david	11	204	13
1698	ballard, clive	11	422	0
1811	barbui, corrado	10	224	1
2455	berk, michael	22	2472	24
2772	birmaher, boris	10	1391	0
2793	bishop, jeffrey r.	10	246	5
3041	bojarski, andrzej j.	10	351	10
3829	buckley, peter f.	13	638	2
4452	carlsson, a.	15	2020	1
4453	carlsson, arvid	12	1151	6
4457	carlsson, maria l.	10	1115	7
4970	charney, dennis s.	10	1823	12
5578	citrome, leslie	25	729	2
5769	collier, d.a.	11	1222	10
5935	copolov, david	11	293	8
6005	correll, christoph u.	24	3766	22
6269	cryan, john f.	10	1022	8
6690	davidson, michael	12	672	9
6786	de bartolomeis, andrea	12	440	8
6811	de deurwaerdère, philippe	11	303	11
6890	de luca, vincenzo	16	427	22
6991	dean, brian	33	1508	26
7187	deng, chao	12	386	8
7356	di giovanni, giuseppe	20	768	20
7372	di matteo, vincenzo	10	565	8
7499	dinan, timothy g.	11	1066	8
8268	ellingrod, vicki l.	12	565	5
8577	fabbri, chiara	10	187	14
8616	fagiolini, andrea	13	1015	7
8651	falkai, peter	10	398	10
8722	farde, lars	16	1681	24
8930	fernandez, hubert h.	11	572	3
9359	fornaro, michele	11	443	8
9415	fox, susan h.	12	2078	9
9608	friedman, joseph h.	13	578	4
10356	geyer, m.a.	11	2421	0
10358	geyer, mark a.	28	4032	13
10544	ginsberg, david l.	19	11	0
10701	goff, donald c.	11	469	0
10704	gogos, andrea	10	347	12
10727	goldberg, joseph f.	11	257	3
10789	golimbet, v.e.	21	137	32
10863	gonzález-maeso, javier	50	3036	50
10898	goodwin, frederick k.	10	1339	1
11544	gur, raquel e.	10	312	1
11799	halldin, christer	15	1585	24
11868	hamon, michel	10	568	0
12120	harvey, philip d.	17	1279	11
12140	hashimoto, kenji	25	1421	11
12283	he, lin	15	375	0
12915	hollander, eric	12	604	9
12923	holloway, terrell	13	1221	29
12986	hong, chen-jee	15	792	16
13060	horiguchi, masakuni	10	471	13
13169	howes, oliver d.	11	1082	6
13279	huang, mei	18	974	22
13299	huang, xu-feng	13	589	7
13412	huot, philippe	15	587	7
13641	inada, toshiya	10	233	28
13867	iwata, nakao	19	617	36
13879	iyo, masaomi	19	976	28
13965	jain, sanjeev	10	383	0
13977	jakovljević, miro	17	637	17
14210	jeste, dilip v.	12	773	0
14544	juckel, georg	14	810	2
14785	kane, john m.	17	1232	18
14833	kanner, andres m.	10	1594	3
14887	kapur, s.	10	2069	0
14888	kapur, shitij	30	4410	22
14993	kasper, siegfried	47	1726	35
15025	kato, tadafumi	10	602	6
15151	keck jr., paul e.	14	1562	8
15222	kelly, deanna l.	11	338	2
15257	kennedy, james l.	35	2840	44
15298	kerwin, r.w.	18	1332	12
15566	kim, yong-ku	10	625	1
15681	kishi, taro	10	263	27
15754	kleinman, joel e.	10	1150	6
15759	kleven, mark s.	10	671	8
15825	knudsen, gitte m.	11	412	2
16114	korovaitseva, g.i.	12	36	23
16401	krystal, john h.	10	842	10
16472	kulkarni, jayashri	10	305	0
16558	kupfer, david j.	12	1098	15
16611	kusljic, snezana	10	214	12
16904	lane, hsien-yuan	14	496	0
17017	laruelle, marc	13	1420	15
17049	lattuada, enrico	10	485	36
17180	leboyer, marion	14	1436	1
17890	lieberman, jeffrey a.	28	3166	26
17918	lilli, roberta	12	647	42
18399	lorenzi, cristina	17	759	46
18913	maes, michael	15	593	9
19007	maier, wolfgang	19	1967	42
19092	malhi, gin s.	12	1268	3
19097	malhotra, anil k.	18	1973	17
19323	marazziti, donatella	16	539	7
19370	marder, stephen r.	10	2308	4
19374	marek, gerard j.	12	1327	5
20043	mccreary, andrew c.	10	471	7
20081	mcelroy, susan l.	16	1341	7
20150	mcintyre, roger s.	24	1278	11
20257	meana, j. javier	13	1024	13
20395	meltzer, h.y.	29	2442	0
20398	meltzer, herbert y.	113	11616	76
20716	millan, mark j.	22	3073	13
21291	moreno, josé l.	19	1363	39
21599	mulsant, benoit h.	16	1364	12
21799	möller, hans-jürgen	31	2254	20
21811	mück-šeler, dorotea	14	679	23
21818	müller, daniel j.	15	769	21
21828	müller, norbert	15	1119	4
21852	nabeshima, toshitaka	12	910	2
22102	nasrallah, henry a.	21	243	0
22231	nemeroff, charles b.	20	2411	15
22310	newman-tancredi, adrian	27	2184	19
22783	nutt, david j.	14	1116	9
22791	nyberg, svante	12	1329	20
22811	nöthen, markus m.	11	1123	20
23010	ohno, yukihiro	10	517	0
23420	ozaki, norio	16	647	34
23817	park, young-min	11	170	0
23823	parker, gordon	13	290	1
23856	partyka, anna	13	343	17
24131	peitl, vjekoslav	10	76	0
24498	pickar, david	12	821	6
24681	pivac, nela	28	1008	24
24802	pollock, bruce g.	11	1543	11
24978	poyurovsky, michael	18	806	14
25314	quednow, boris b.	11	672	25
25916	remington, gary	21	3675	13
26015	reynolds, gavin p.	21	1810	0
26148	rietschel, m.	10	562	0
26149	rietschel, marcella	13	1676	33
26276	robbins, trevor w.	11	2103	4
26710	roth, bryan l.	37	4789	5
26729	rothschild, anthony j.	10	842	8
26871	rujescu, dan	10	1178	23
27575	sawa, akira	10	969	0
27614	scarr, elizabeth	13	578	20
27654	schatzberg, alan f.	13	714	8
28057	sealfon, stuart c.	12	1717	27
28096	seeman, philip	12	1576	3
28252	serretti, alessandro	60	2526	75
28887	silver, henry	18	466	0
29186	smeraldi, enrico	27	1151	48
29599	spina, edoardo	20	1173	1
29706	stahl, stephen m.	38	1679	5
30232	sumiyoshi, tomiki	26	1049	8
30402	svensson, torgny h.	13	807	6
30762	tamminga, carol a.	11	613	4
30877	tarazi, frank i.	15	769	2
31127	thase, michael e.	20	3048	7
31279	tiihonen, jari	10	310	0
31699	tsai, shih-jen	19	973	16
32175	van den buuse, maarten	29	752	21
32615	vieta, eduard	21	1918	28
32802	vollenweider, franz x.	14	2378	7
32927	wagner, michael	10	509	24
33392	weinberger, daniel r.	15	1834	7
33410	weintraub, daniel	11	1861	2
33441	weizman, a.	11	334	0
33442	weizman, abraham	35	1337	17
33514	wesołowska, anna	12	264	15
34720	young, allan h.	11	1098	8
35336	zink, mathias	10	392	0
35375	zohar, joseph	15	784	27

## Sheet: Countries
id	country	documents	citations	total link strength
1	(hms)	1	17	4
2	(icrea)	1	22	2
3	(vacchcs)	1	1	1
4	02-028)	1	9	2
5	184 liberty street	1	114	1
6	6560 fannin street	1	6	1
7	administration	1	223	1
8	afghanistan	1	15	1
9	algeria	1	26	1
10	argentina	27	3548	40
11	arizona	1	12	10
12	armenia	1	2	1
13	asst fatebenefratelli-sacco	1	4	2
14	australia	552	21612	556
15	austria	108	9262	209
16	azerbaijan	1	1	0
17	bahrain	3	9	2
18	bangladesh	2	2	4
19	basle	1	32	0
20	beershevaisrael	1	17	0
21	belarus	1	16	1
22	belgium	135	12010	205
23	belgrade university	1	110	2
24	biochemical psychiatry unit	1	124	4
25	biovail	1	0	8
26	bosnia and herzegovina	5	150	9
27	boston	2	101	4
28	bouve and acute	1	29	1
29	brazil	183	5861	242
30	bristol medical school	1	6	2
31	bulgaria	12	245	38
32	c	1	3	0
33	california	1	1	2
34	canada	769	48473	652
35	care	1	26	1
36	center	2	5	3
37	chiba japan	1	33	3
38	chibajapan	1	33	3
39	chile	23	1249	73
40	china	287	7660	222
41	city	1	16	1
42	cleveland clinic	1	8	0
43	clinics	1	1	2
44	college of medicine	1	62	1
45	colombia	11	533	30
46	columbia university	3	100	14
47	committee	1	0	3
48	complutense university	1	21	2
49	connecticut	1	12	10
50	corcept	1	0	8
51	costa rica	2	37	3
52	croatia	76	2253	47
53	cuba	2	130	8
54	cyprus	4	19	4
55	czech republic	56	2500	105
56	ddr)	3	76	0
57	debray)	1	91	3
58	dementia research centre	1	7	9
59	denmark	170	10057	227
60	department of psychiatry	3	43	4
61	diabetes program	1	9	2
62	diseases	1	6	1
63	drammen	1	6	1
64	ecuador	3	55	7
65	egypt	24	246	43
66	eli lilly	1	0	8
67	england	1	38	0
68	estonia	6	121	17
69	ethiopia	4	13	11
70	features	1	4	0
71	finland	85	3237	95
72	fondation fondamental	1	1	2
73	france	388	24200	465
74	frost and sullivan	1	0	0
75	general adult psychiatry	1	0	3
76	georgia	5	971	20
77	germany	712	41587	813
78	glaxosmithkline	1	0	8
79	greece	77	3186	63
80	grenada	1	44	1
81	guinea-bissau	1	129	1
82	hampshireu.k	1	4	1
83	harvard medical school	3	141	17
84	health	3	792	14
85	hill	1	93	10
86	hms	1	17	4
87	hong kong	41	1309	98
88	hospital	3	31	5
89	hospital de galdakao-usánsolo	1	30	1
90	hungary	65	2856	85
91	iceland	6	1001	24
92	ichikawa chibajapan	1	33	3
93	india	289	6990	231
94	indonesia	7	28	38
95	institute	2	99	12
96	iran	80	2110	82
97	iraq	6	27	9
98	ireland	113	5427	147
99	is research coordinator	1	124	4
100	israel	224	11082	175
101	italy	681	31629	727
102	jamaica	2	46	1
103	janssen-cilag	1	67	1
104	japan	521	19925	257
105	jordan	8	58	9
106	k7l 4x3	1	241	0
107	karolinska institute	1	338	1
108	kazakhstan	2	7	2
109	kentucky	1	3	0
110	kenya	2	1703	13
111	kuwait	10	32	11
112	lebanon	9	217	10
113	leiden	1	49	4
114	lemperiere)	1	91	3
115	libyan arab jamahiriya	1	56	1
116	lithuania	7	137	14
117	lodz	1	4	1
118	loo)	1	91	3
119	ltd	1	0	0
120	luxembourg	2	73	11
121	macao	7	240	33
122	malawi	1	2	0
123	malaysia	22	358	36
124	malta	16	526	47
125	mannheim	1	49	3
126	maudsley hospital	1	0	1
127	mclean hospital	2	59	7
128	medical college hospital	1	8	1
129	medicine	8	87	14
130	mexico	52	1198	49
131	mgh	1	17	4
132	mirecc	1	581	3
133	mishovic	1	110	2
134	montreal	1	59	1
135	morocco	2	15	1
136	mozambique	1	0	1
137	nathan s	1	29	0
138	nauru	1	2	2
139	nepal	2	0	2
140	netherlands	316	20910	426
141	netherlands antilles	1	20	1
142	neurobiology 2 division	1	44	1
143	new york	2	72	8
144	new yorku.s.a	1	49	0
145	new zealand	100	5824	71
146	nigeria	16	1910	52
147	nimh	1	174	1
148	north macedonia	2	941	16
149	northwestern university	1	110	2
150	norway	80	5137	181
151	nsccahs	1	89	2
152	ohio	1	12	10
153	ont	2	42	1
154	orexigen	1	0	8
155	organon	1	0	8
156	pakistan	30	333	30
157	palestine	3	16	4
158	paris saclay	1	4	1
159	paris)	1	4	2
160	pediatrics	1	39	3
161	pennsylvania	1	4	1
162	perception physiology group	1	11	1
163	peru	6	76	11
164	pfizer	1	0	8
165	pfizer inc	1	5	1
166	philippines	1	2	0
167	poland	203	5928	141
168	portugal	50	3000	97
169	program	1	50	1
170	psychiatry	3	93	6
171	psychopharmacology	1	1	3
172	puerto rico	2	65	2
173	qatar	7	259	10
174	research	1	124	4
175	riley hospital	1	110	2
176	rockefeller university	1	6	4
177	romania	19	239	12
178	russia	2	66	0
179	russian federation	96	2417	121
180	rwanda	1	6	1
181	san diego	1	31	1
182	san diegousa	1	427	0
183	san marino	1	198	2
184	saudi arabia	22	217	16
185	school of medicine	1	6	4
186	seattle children's hospital	1	93	10
187	serbia	20	1677	57
188	service	1	12	2
189	sinai-grace hospital	1	1	2
190	singapore	56	2714	124
191	slovakia	5	93	24
192	slovenia	20	522	17
193	smithkline beecham organization	1	98	1
194	south africa	64	1850	105
195	south korea	137	4011	144
196	spain	394	21454	524
197	sri lanka	2	4	2
198	st maarten	1	0	1
199	st. john's university	1	4	1
200	st. michael's hospital	1	6	1
201	stroke	1	93	10
202	sweden	288	18181	362
203	switzerland	224	16737	428
204	system	1	11	2
205	tainan	1	7	1
206	taiwan	116	3268	68
207	technische universität dresden	1	29	2
208	thailand	30	736	80
209	the melbourne clinic	1	63	16
210	therapeutics	1	7	1
211	tokyojapan	1	33	3
212	trinidad and tobago	1	20	1
213	tunisia	5	53	19
214	turkey	98	1843	72
215	ubc	1	33	1
216	uganda	4	95	8
217	uk box 1	1	152	0
218	ukraine	8	236	22
219	umass medical school	1	93	10
220	unidad de medicina	1	0	1
221	united arab emirates	16	653	22
222	united kingdom	1422	86325	1132
223	united kingdon	2	9	0
224	united states	4901	288177	1882
225	unité inserm u657	1	17	3
226	university	2	97	12
227	university of bonn	1	49	3
228	university of connecticut	1	3	1
229	university of munich	1	49	3
230	university of richmond	1	73	1
231	university of sydney	1	12	2
232	university of toronto	3	453	3
233	university of ulm	1	29	2
234	university of washington	2	99	14
235	università di siena	1	2	1
236	uruguay	7	946	12
237	usa	14	401	13
238	usa 2002	1	31	1
239	ussr	1	0	1
240	v	1	67	1
241	venezuela	10	312	14
242	victoria	2	62	1
243	viet nam	3	27	10
244	weskoppies hospital	1	0	1
245	wiltshireu.k	1	4	1
246	yugoslavia	4	67	0
